# Supplementary material
Source: PubMed Central journal article supplement (PMC8933284)
Supplement: mmc1.pdf [file mmc1.pdf]

# **Associations Between Statin Use and Negative Affective Bias During COVID-19: An Observational, Longitudinal UK Study Investigating Depression Vulnerability**

## **Supplementary Information**

Supplementary Figures S1, S2 and S3

Detailed statistical analysis approach

Additional methods (including ECAT and EREC)

Statistical packages used

Supplementary Table S1: Characteristics of participants by medication group

Supplementary Table S2: Results for covariate identification analysis

Supplementary Table S3: Results for all analyses and sensitivity checks

# Supplementary Figures

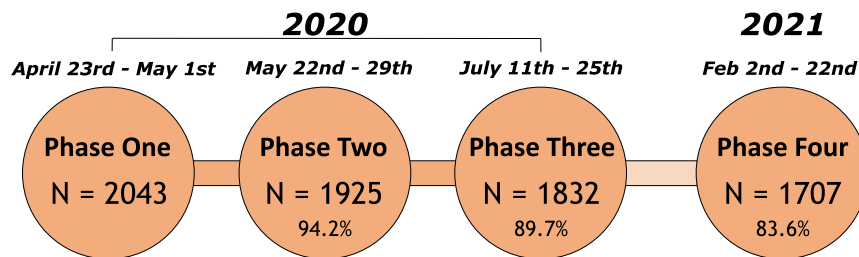

| Cognitive Tasks                                                                                    |        |
|----------------------------------------------------------------------------------------------------|--------|
| Facial expression recognition (FERT)<br>Emotional categorisation (ECAT)<br>Emotional recall (EREC) |        |
| Probabilistic instrumental learning (PILT)                                                         | N-back |

| Self-report psychological scales                                              |                                                                      |
|-------------------------------------------------------------------------------|----------------------------------------------------------------------|
| Depressive symptoms (CESD)<br>Anxiety symptoms (GAD-7)<br>Loneliness (UCLA-3) | Behavioural activation (BADs)<br>Social interaction (ESLA - adapted) |
| Trait anxiety (STAIT)                                                         | Anhedonia (SHAPS-14)                                                 |

| Demographics and medical history                                                                                                                                               |  |
|--------------------------------------------------------------------------------------------------------------------------------------------------------------------------------|--|
| Current medication use (statins, anti-hypertensives, anti-depressants)<br>Current psychiatric diagnosis and past psychiatric diagnosis<br>Current use of psychological therapy |  |
| Current level of social distancing<br>Current employment status                                                                                                                |  |
| Age<br>Gender<br>Ethnicity<br>Education<br>Income                                                                                                                              |  |

**Supplementary Figure S1:** Visual summary of data collection throughout the COSIE study

| Facial Expression Recognition (FERT)                                                                                                                                                                                                                                                                                                                              | Probabilistic Instrumental Learning (PILT)                                                                                                                                                                                                                                                                                                                                          | N-back                                                                                                                                                                                                                                                                                                                                                              |
|-------------------------------------------------------------------------------------------------------------------------------------------------------------------------------------------------------------------------------------------------------------------------------------------------------------------------------------------------------------------|-------------------------------------------------------------------------------------------------------------------------------------------------------------------------------------------------------------------------------------------------------------------------------------------------------------------------------------------------------------------------------------|---------------------------------------------------------------------------------------------------------------------------------------------------------------------------------------------------------------------------------------------------------------------------------------------------------------------------------------------------------------------|
| <ul style="list-style-type: none"> <li>• Participants are asked to identify the facial expression</li> <li>• 250 facial expressions across 4 blocks</li> <li>• Anger, disgust, fear, happiness, sadness, surprise + neutral</li> <li>• Fixed pseudo-randomised order</li> </ul> 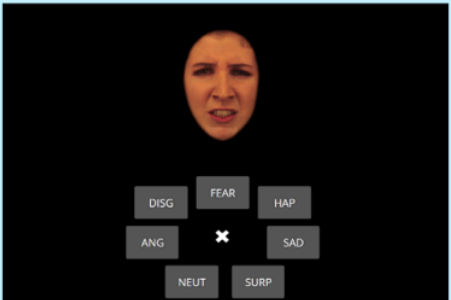 | <ul style="list-style-type: none"> <li>• Participants are asked to pick the optimal symbol</li> <li>• Each symbol has either 70% or 30% chance of winning 20 points (gain trials) or losing 20 points (loss trials)</li> <li>• 180 trials across 3 blocks</li> <li>• Randomised order</li> </ul>  | <ul style="list-style-type: none"> <li>• Participants are asked to decide if the presented stimulus matches the stimulus presented N-trials ago</li> <li>• 0-back, 1-back, 2-back and 3-back conditions</li> <li>• 160 trials across 8 blocks</li> <li>• Fixed order</li> </ul>  |

**Supplementary Figure S2:** Description and screenshots of cognitive tasks included in the COSIE study

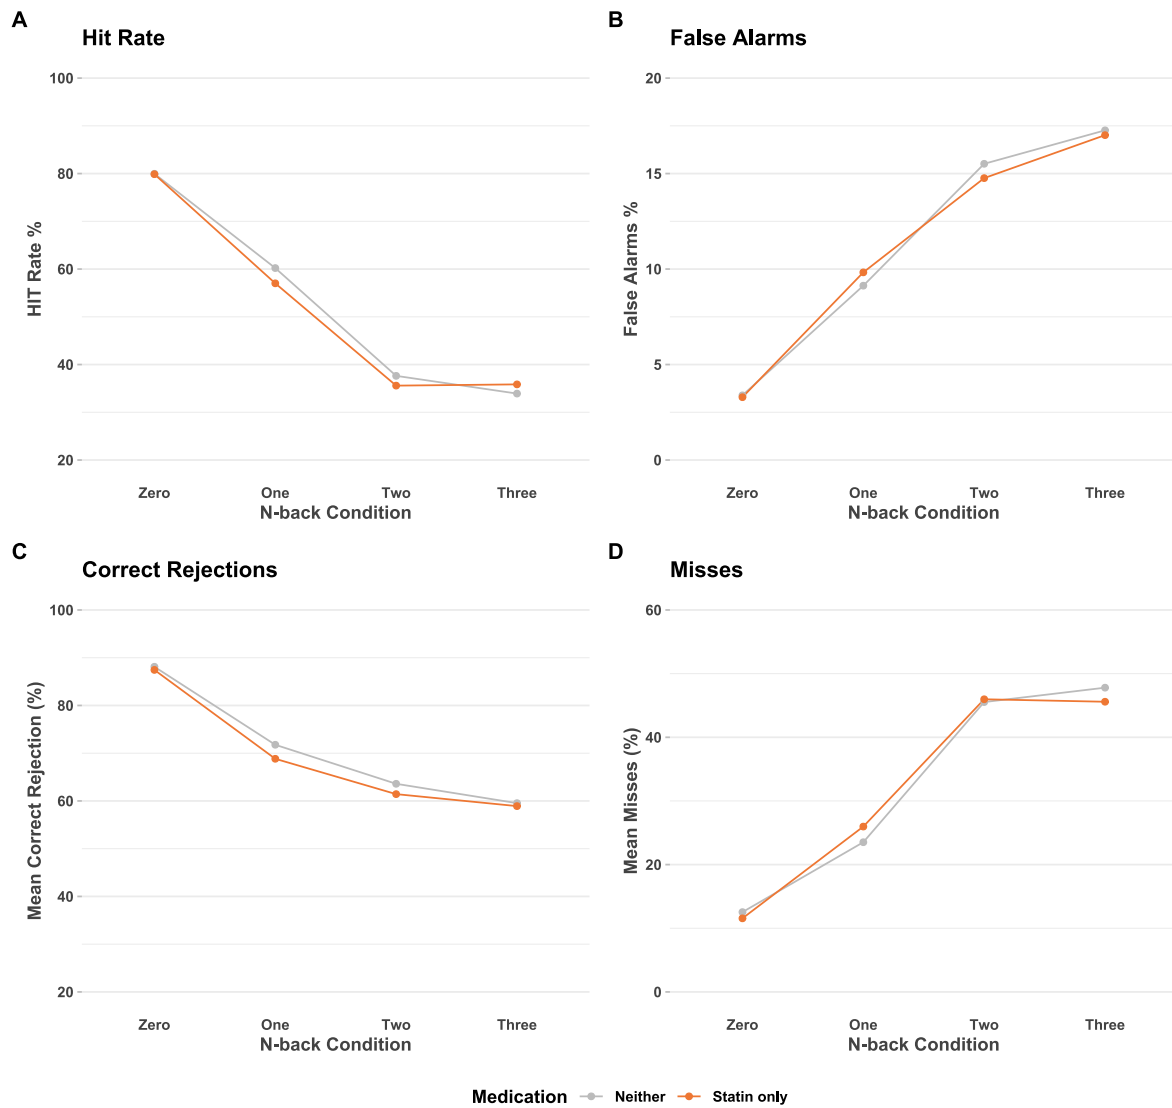

Figure 5: Working memory task performance - N-back - by medication group.

**Supplementary Figure S3:** Working memory task performance - N-back - by medication group. A) Mean proportion of hits on N-back, by condition (0 = control condition, 3 = most challenging). B) Mean proportion of false alarms on N-back, by condition. C) Mean proportion of correct rejections on N-back, by condition. D) Mean proportion of misses on N-back, by condition.

## Detailed statistical analysis approach

|                                                                                                                                                                                                                                                                                                                        |                                                                                                                                                                                                                                                                                                                                                                                                                                                                                                                                                                                                                                                                                                                                                                                                                                                                                                                                                                                                                                                                                                                                                                                                                                                       |
|------------------------------------------------------------------------------------------------------------------------------------------------------------------------------------------------------------------------------------------------------------------------------------------------------------------------|-------------------------------------------------------------------------------------------------------------------------------------------------------------------------------------------------------------------------------------------------------------------------------------------------------------------------------------------------------------------------------------------------------------------------------------------------------------------------------------------------------------------------------------------------------------------------------------------------------------------------------------------------------------------------------------------------------------------------------------------------------------------------------------------------------------------------------------------------------------------------------------------------------------------------------------------------------------------------------------------------------------------------------------------------------------------------------------------------------------------------------------------------------------------------------------------------------------------------------------------------------|
| <b>Medication groups</b>                                                                                                                                                                                                                                                                                               |                                                                                                                                                                                                                                                                                                                                                                                                                                                                                                                                                                                                                                                                                                                                                                                                                                                                                                                                                                                                                                                                                                                                                                                                                                                       |
| In order to investigate the specific effect of statins, independent of blood pressure medication, participants were classified into four groups: those taking 1) statins only, 2) blood pressure medication only, 3) both medications, or 4) neither.                                                                  |                                                                                                                                                                                                                                                                                                                                                                                                                                                                                                                                                                                                                                                                                                                                                                                                                                                                                                                                                                                                                                                                                                                                                                                                                                                       |
| <b>Group differences in demographic and self-report measures</b>                                                                                                                                                                                                                                                       |                                                                                                                                                                                                                                                                                                                                                                                                                                                                                                                                                                                                                                                                                                                                                                                                                                                                                                                                                                                                                                                                                                                                                                                                                                                       |
| Due to the low frequency of specific non-white ethnicities in the medication groups ( $n < 6$ , see Table 1), ethnicity was categorised as white or non-white.                                                                                                                                                         |                                                                                                                                                                                                                                                                                                                                                                                                                                                                                                                                                                                                                                                                                                                                                                                                                                                                                                                                                                                                                                                                                                                                                                                                                                                       |
| <b>Covariate selection:</b> Variables found to significantly differ between groups were included as covariates in below task analysis. See Supplementary File C for results.                                                                                                                                           |                                                                                                                                                                                                                                                                                                                                                                                                                                                                                                                                                                                                                                                                                                                                                                                                                                                                                                                                                                                                                                                                                                                                                                                                                                                       |
| Where multiple potential covariates assessed overlapping constructs, final covariates were chosen based on either greater sensitivity (i.e. continuous variables), greater theoretical/mechanistic plausibility (e.g. antidepressant use) or greater associations/significance after controlling for other covariates. |                                                                                                                                                                                                                                                                                                                                                                                                                                                                                                                                                                                                                                                                                                                                                                                                                                                                                                                                                                                                                                                                                                                                                                                                                                                       |
| <b>Continuous variables</b>                                                                                                                                                                                                                                                                                            | Linear regression, controlling for age and gender<br>e.g. $lm(outcome \sim group + Age + Gender, data = df)$                                                                                                                                                                                                                                                                                                                                                                                                                                                                                                                                                                                                                                                                                                                                                                                                                                                                                                                                                                                                                                                                                                                                          |
| <b>Categorical variables</b>                                                                                                                                                                                                                                                                                           | Logistic regression, controlling for age and gender<br>e.g. $glm(outcome \sim group + Age + Gender, data = df, family = binomial)$                                                                                                                                                                                                                                                                                                                                                                                                                                                                                                                                                                                                                                                                                                                                                                                                                                                                                                                                                                                                                                                                                                                    |
| <b>Task analysis</b>                                                                                                                                                                                                                                                                                                   |                                                                                                                                                                                                                                                                                                                                                                                                                                                                                                                                                                                                                                                                                                                                                                                                                                                                                                                                                                                                                                                                                                                                                                                                                                                       |
| For all tasks, participants with a total percentage accuracy (across conditions) of more than 3sds above or below the mean, or with a total mean reaction time (across conditions) of more than 3sds above or below the mean were excluded.                                                                            |                                                                                                                                                                                                                                                                                                                                                                                                                                                                                                                                                                                                                                                                                                                                                                                                                                                                                                                                                                                                                                                                                                                                                                                                                                                       |
| <b>FERT</b>                                                                                                                                                                                                                                                                                                            | <p><b>Outcomes:</b></p> <p><b>Unbiased hit rate</b>, as described by Wagner (1993) – a measure of emotion identification accuracy which accounts for response bias i.e. any general tendency to identify the emotion when it is not present. Calculated as <i>proportion of hits * (number of hits/all hits and misses)</i>.</p> <p><b>Misclassifications:</b> For emotions with a significant group differences in unbiased hit rate, we assessed misclassifications (the number of times a participant made a specific misclassification, e.g. identifying a fearful face as surprised) to determine which emotion they were incorrectly identifying these faces as.</p> <p><b>Reaction time</b> (ms) for trials with correct responses was also assessed.</p> <p>ANCOVAs were chosen as the primary analysis approach due to the lack of natural reference condition for the FERT, our primary emotional processing task.</p> <p>Mixed model ANCOVAs</p> <ul style="list-style-type: none"> <li>• Between subject factor – medication group</li> <li>• Within-subject factor - emotion of the facial expression</li> <li>• Interaction between group and task condition on task performance</li> <li>• Covariates - identified as above</li> </ul> |
|                                                                                                                                                                                                                                                                                                                        | <p><b>Outlier removal:</b></p> <p>Trials where participants responded in under 200ms or over 6000ms were excluded (across all time-points, 0.05% and 1.01% of trials respectively).</p> <p>Participants with a total percentage accuracy below 20% were excluded (Baseline, <math>n=1</math>; Phase 2, <math>n=4</math>; Phase 3, <math>n=7</math>).</p> <p>Exclusion for summary variables being 3sds above or below the mean (Baseline, <math>n = 29</math>; Phase 2, <math>n=28</math>; Phase 3, <math>n=30</math>).</p>                                                                                                                                                                                                                                                                                                                                                                                                                                                                                                                                                                                                                                                                                                                           |

|               |                                                                                                                                                                                                                                                                                                                                                                                                                                                                                                                                                                                                                                                                                                                                                                                                                                                                                                                                                                                                                                                                                                                                                                                                                                                                                                                                                                                                                                  |                                                                                                                                                                                                                                                                                                                                                                                                                                                                                         |
|---------------|----------------------------------------------------------------------------------------------------------------------------------------------------------------------------------------------------------------------------------------------------------------------------------------------------------------------------------------------------------------------------------------------------------------------------------------------------------------------------------------------------------------------------------------------------------------------------------------------------------------------------------------------------------------------------------------------------------------------------------------------------------------------------------------------------------------------------------------------------------------------------------------------------------------------------------------------------------------------------------------------------------------------------------------------------------------------------------------------------------------------------------------------------------------------------------------------------------------------------------------------------------------------------------------------------------------------------------------------------------------------------------------------------------------------------------|-----------------------------------------------------------------------------------------------------------------------------------------------------------------------------------------------------------------------------------------------------------------------------------------------------------------------------------------------------------------------------------------------------------------------------------------------------------------------------------------|
|               | <p>e.g. <math>\text{anova}(\text{lmer}(\text{Task outcome} \sim \text{Emotion} * \text{Group} + \text{covariates} + (1 \text{Participant.Public.ID}), \text{data}=\text{df}))</math></p> <p><b>Post-hoc analysis for significant interactions:</b><br/>One-way ANCOVAs for specific task conditions and/or specific medication groups</p> <ul style="list-style-type: none"> <li>If significant, an equivalent linear regression model was used to confirm analytical robustness</li> </ul> <p>e.g. <math>\text{lmer}(\text{Task outcome} \sim \text{Group} + \text{covariates} + (1 \text{Participant.Public.ID}), \text{data}=\text{df\_restricted\_by\_condition/groups})</math></p> <p>Data from all three time-points was included, with time-point added as a covariate.</p>                                                                                                                                                                                                                                                                                                                                                                                                                                                                                                                                                                                                                                               |                                                                                                                                                                                                                                                                                                                                                                                                                                                                                         |
| <b>PILT</b>   | <p><b>Outcome:</b></p> <p><b>Proportion of trials for which the participant chose the most advantageous symbol (%)</b> i.e. whether participants correctly chose the stimuli with the 0.7 probability of gaining points in the gain trials, and whether participants correctly chose the stimuli with the 0.3 probability of losing points in the loss trials. Performance was primarily assessed over the final 20 trials for each condition, as – similar to previous studies (e.g. Walsh 2017), this is where learning plateaued. Models were re-run including all trials to ensure robustness.</p> <p>One-way ANCOVAs for gain trials and loss trials</p> <ul style="list-style-type: none"> <li>Between subject factor – medication group</li> <li>Covariates - identified as above</li> </ul> <p>e.g. <math>\text{anova}(\text{lmer}(\text{Task outcome} \sim \text{Group} + \text{covariates} + (1 \text{Participant.Public.ID}), \text{data}=\text{df}))</math></p> <p><b>Post-hoc analysis for significant interactions:</b><br/>One-way ANCOVAs for specific medication groups</p> <ul style="list-style-type: none"> <li>If significant, an equivalent linear regression model was used to confirm analytical robustness</li> </ul> <p>e.g. <math>\text{lmer}(\text{Task outcome} \sim \text{Group} + \text{covariates} + (1 \text{Participant.Public.ID}), \text{data}=\text{df\_restricted\_by\_groups})</math></p> | <p><b>Outlier removal:</b><br/>Trials where participants responded in under 200ms or over 5000ms were excluded (0.44% and 0.64% of trials respectively).</p> <p>Participants who chose the high probability stimulus less than 60% of the time in the gain trials or more than 40% of the time in loss trials were excluded, as they were presumed to not adequately understand the task (n=295).</p> <p>Exclusion for summary variables being 3sds above or below the mean (n=27).</p> |
| <b>N-back</b> | <p><b>Outcomes:</b></p> <p><b>Hit rate (%)</b> i.e. the proportion of trials in which a letter matched the n-back requirement and the participant correctly identified this.</p> <p><b>Misses (%)</b> i.e. the proportion of trials in which a letter matched the n-back requirement and the participant incorrectly identified that it did not.</p> <p><b>Correct rejections (%)</b> i.e. the proportion of trials in which a letter did not meet the n-back requirement and the participant correctly identified that it did not.</p> <p><b>False alarms (%)</b> i.e. the proportion of trials in which a letter did not meet the n-back requirement and the participant incorrectly identified that it did.</p>                                                                                                                                                                                                                                                                                                                                                                                                                                                                                                                                                                                                                                                                                                               | <p><b>Outlier removal:</b><br/>Trials where participants responded in under 200ms or over 6000ms were excluded (1.79%, and 0.0065% of trials respectively)</p> <p>Participants with a total percentage accuracy below 20% were excluded (n=44).</p> <p>Exclusion for summary variables being 3sds above or below the mean (n=11).</p>                                                                                                                                                   |

|                                                                                                                                                                                                                                                                                                                                                                                                                                                                                                                                                                                                                                                                                                                                                                                                                                                                                                                                                                   |                                                                                                                                                                                                                                                                                                                                                                                                                                                                                                                                                                                                                                                                                                                                                                                                                                                                                                                                                                                                                                                                                                                                                                                                                                                                                                                                                                                                                                           |  |
|-------------------------------------------------------------------------------------------------------------------------------------------------------------------------------------------------------------------------------------------------------------------------------------------------------------------------------------------------------------------------------------------------------------------------------------------------------------------------------------------------------------------------------------------------------------------------------------------------------------------------------------------------------------------------------------------------------------------------------------------------------------------------------------------------------------------------------------------------------------------------------------------------------------------------------------------------------------------|-------------------------------------------------------------------------------------------------------------------------------------------------------------------------------------------------------------------------------------------------------------------------------------------------------------------------------------------------------------------------------------------------------------------------------------------------------------------------------------------------------------------------------------------------------------------------------------------------------------------------------------------------------------------------------------------------------------------------------------------------------------------------------------------------------------------------------------------------------------------------------------------------------------------------------------------------------------------------------------------------------------------------------------------------------------------------------------------------------------------------------------------------------------------------------------------------------------------------------------------------------------------------------------------------------------------------------------------------------------------------------------------------------------------------------------------|--|
|                                                                                                                                                                                                                                                                                                                                                                                                                                                                                                                                                                                                                                                                                                                                                                                                                                                                                                                                                                   | <p><b>d' (d prime)</b> measures sensitivity i.e. the normalised distance between the two distributions: signal, and signal + noise. The d' is calculated from the Z value of the hit rate minus that of the false alarm (FA) rate i.e. <math>d' = Z_{Hit} - Z_{FA}</math>. A positive d' indicates better than chance performance.</p> <p><b>beta</b> an index of accuracy that accounts for response bias.</p> <p><b>Reaction time</b> (ms) for trials with correct responses were also assessed.</p> <p>Mixed model ANCOVAs</p> <ul style="list-style-type: none"> <li>• Between subject factor – medication group</li> <li>• Within-subject factor – n-back condition (0-back, 1-back, 2-back, 3-back)</li> <li>• Interaction between group and task condition on task performance</li> <li>• Covariates - identified as above</li> </ul> <p>e.g. <math>anova(lmer(Task\ outcome \sim n\text{-back}\ condition * Group + covariates + (1 Participant.Public.ID), data=df))</math></p> <p><b>Post-hoc analysis for significant interactions:</b><br/>One-way ANCOVAs for specific task conditions and/or specific medication groups</p> <ul style="list-style-type: none"> <li>• If significant, an equivalent linear regression model was used to confirm analytical robustness</li> </ul> <p>e.g. <math>lmer(Task\ outcome \sim Group + covariates + (1 Participant.Public.ID), data=df\_restricted\_by\_condition/groups)</math></p> |  |
| <b>Sensitivity Checks</b>                                                                                                                                                                                                                                                                                                                                                                                                                                                                                                                                                                                                                                                                                                                                                                                                                                                                                                                                         |                                                                                                                                                                                                                                                                                                                                                                                                                                                                                                                                                                                                                                                                                                                                                                                                                                                                                                                                                                                                                                                                                                                                                                                                                                                                                                                                                                                                                                           |  |
| <p>To confirm the robustness of our models, all analyses were repeated controlling only for demographic covariates, as well as uncorrected.</p> <p>Sensitivity checks for analyses included:</p> <p>a) excluding participants on a non-lipophilic statin, to confirm results were associated with statins able to cross the blood-brain barrier (<i>all analyses</i>);</p> <p>b) excluding participants who reported a non-binary or other gender (due to the small group size, <math>n &lt; 10</math>) (<i>all analyses</i>);</p> <p>c) excluding all participants who failed understanding checks on the PILT (<i>PILT analyses</i>);</p> <p>d) excluding all participants who scored below 90% on the ECAT (<i>ECAT and EREC analyses</i>);</p> <p>e) excluding all participants who recalled zero words on the EREC (<i>ECAT and EREC analyses</i>).</p>                                                                                                      |                                                                                                                                                                                                                                                                                                                                                                                                                                                                                                                                                                                                                                                                                                                                                                                                                                                                                                                                                                                                                                                                                                                                                                                                                                                                                                                                                                                                                                           |  |
| <b>Additional Analyses</b>                                                                                                                                                                                                                                                                                                                                                                                                                                                                                                                                                                                                                                                                                                                                                                                                                                                                                                                                        |                                                                                                                                                                                                                                                                                                                                                                                                                                                                                                                                                                                                                                                                                                                                                                                                                                                                                                                                                                                                                                                                                                                                                                                                                                                                                                                                                                                                                                           |  |
| <p>To explore effects of age and gender, all core analyses were repeated including these as interaction terms e.g. <math>lmer(Task\ outcome \sim Group * Age/Gender + covariates + (1 Participant.Public.ID), data=df)</math></p> <p>To explore effects of anti-hypertensive medication type, all core analyses were repeated in four separate ways:</p> <ol style="list-style-type: none"> <li>1) Including anti-hypertensive medication type as a covariate e.g. <math>lmer(Task\ Outcome \sim Group + covariates + BPmed\_group + (1 Participant.Public.ID), data=df)</math></li> <li>2) Including use of L-type calcium channel blockers as a covariate e.g. <math>lmer(Task\ Outcome \sim Group + covariates + Calcium\_channel + (1 Participant.Public.ID), data=df)</math></li> <li>3) Anti-hypertensive medication type as predictor e.g. <math>lmer(Task\ Outcome \sim BPmed\_group + covariates + (1 Participant.Public.ID), data=df)</math></li> </ol> |                                                                                                                                                                                                                                                                                                                                                                                                                                                                                                                                                                                                                                                                                                                                                                                                                                                                                                                                                                                                                                                                                                                                                                                                                                                                                                                                                                                                                                           |  |

4) L-type calcium channel blockers as predictor e.g.  $lmer(\text{Task Outcome} \sim \text{Calcium\_channel} + \text{covariates} + (1|\text{Participant.Public.ID}), \text{data}=\text{df})$

Post-hocs were conducted as appropriate.

#### Predicting long term outcomes

Linear regression models were used e.g.  $lm(\text{outcome} \sim \text{predictor} + \text{covariates}, \text{data} = \text{df})$

*Predictors:* Baseline medication group and baseline task performance measures that significantly differed between medication groups

*Outcomes:* Self-reported depression (CESD) and anxiety (GAD-7) at all timepoints, absolute and change from baseline (score at timepoint - baseline score)

*Covariates:* Identified as above.

#### Pathway analysis:

*Self-report outcome* ~ *Negative affective bias measure* + *Statin use* + *covariates*

*Negative affective bias measure* + *Statin use*

#### Growth curve models:

$i \sim 1*\text{outcome\_BL} + 1*\text{outcome\_T2} + 1*\text{outcome\_T3} + 1*\text{outcome\_T4}$

$s \sim 0*\text{outcome\_BL} + 1*\text{outcome\_T2} + 2*\text{outcome\_T3} + 3*\text{outcome\_T4}$

$i \sim \text{predictor} + \text{covariates}$

$s \sim \text{predictor} + \text{covariates}$



## Additional methods

Participants were paid £7.50 for completion of Phase One, £7.50 for completion of Phase Two, £10 for completion of Phase Three and £2.50 for completion of Phase Four.

The fixed order of the emotional processing tasks was ECAT, FERT, EREC.

During the ECAT, participants were asked to decide whether they would 'like' or 'dislike' to be described with positive and negative personality characteristic words presented briefly (500ms) on screen, in the context of imagining that they have overheard a third party discuss them. The ECAT includes 40 words in a single block, presented with a new randomisation for each participant. Words are matched for word length and ratings of frequency and meaningfulness. The EREC is a free recall task during which participants are given three minutes to type as many words from the ECAT as possible. Participants were aware that they would be asked to recall words from the ECAT. The words recalled were rated as correct or incorrect and as positive, negative or ambiguous/neutral by at least two independent researchers, with a third senior researcher making a final decision on any discrepancies, all blind to group allocation.

For ECAT, the task condition was the valence of the word. The primary outcome was percentage of correctly categorised words. Reaction time (ms) for trials with correct categorisation was also assessed. Trials where participants responded in under 200ms or over 3000ms were excluded, and participants with a total percentage accuracy below 50% were excluded.

For EREC, the task condition was the valence of the word. The primary outcome was the number of correct words recalled. The number of incorrect words (intrusions) was also assessed.

For all emotional processing tasks, task performance across Phases 1, 2 and 3 were included in the models with time-point as a covariate.

### Engagement checks

At Phase One, successful completion of FERT and ECAT understanding checks was mandatory for inclusion. At subsequent time-points, if participants answered incorrectly they were prompted to re-read the instructions and answer the questions again.

Text given to participants is below:

### **FERT**

#### **Faces Task - Instructions**

In this task faces will be presented in the centre of the screen and they will appear for about half a second only. For each face you need to decide whether the emotional expression on the face is one of anger, disgust, fear, happiness, sadness, surprise or is neutral. You will have options along the bottom of the screen with these emotions:

ANG = anger

DISG = disgust

FEAR = fear

HAP = happy

SAD = sadness

SURP = surprise

NEUT = neutral

You will need to respond by using your mouse to select the appropriate option on screen, as quickly and accurately as possible. You must press just one option for every face. If you are unsure, please still make your best guess to choose an emotion. On the next page, there will be some simple questions to check you understand these instructions.

To check your understanding of the task, please answer the below questions. If you are unsure of any and give an incorrect answer, you will see the instructions again and have the chance to complete these questions again.

1.) What should you do when presented with a face on screen?

- use your cursor to select the response at the bottom of the screen which matches how you are currently feeling
- **use your cursor to select the response at the bottom of the screen which matches the expression of the face [correct answer]**
- type the name of the emotional expression of the face
- do nothing but try to remember the face

2.) ANG =

- angle
- **anger [correct answer]**
- angel

3.) NEUT =

- **neutral [correct answer]**
- neutron
- neuter

4.) If you're not sure which option to choose, what should you do?

- do nothing and wait for the next face
- **still choose your best guess [correct answer]**

## ECAT

### **Words Task - Instructions**

In this task, you will be presented with personality characteristic words. Please imagine overhearing someone describing you in this way. Press the "D" key on your keyboard if you would dislike to be described in this way and "L" button if you would like to be described in this way. For example, you might see the word "helpful" which you would like to be described as, so you would press "L", or the word "boring" which you would dislike to be described as, so you would press "D". Please use your index fingers, and keep them on the two keyboard keys throughout the task. Please respond as quickly and accurately as possible. Later in the session you will be asked to recall as many of the words from this task as you can and type them into a free text box.

The next page will ask you some simple questions about these instructions, to check you understand them.

To check your understanding of the task, please answer the below questions. If you are unsure of any and give an incorrect answer, you will see the instructions again and have the chance to complete these questions again.

1.) What should you do if you would dislike to be described as the word which appears on screen?

- do nothing and wait for the next word
- press ENTER
- **press D on the keyboard [correct answer]**
- press the right arrow key

2.) What should you do if you would like to be described as the word which appears on screen?

- press the space bar
- **press L on the keyboard [correct answer]**
- press the left arrow key
- do nothing and wait for the next word

## PILT

### Learning Task - Instructions

In this task you will be presented with a series of symbol pairs. On each trial you will be asked to choose between the two symbols displayed on screen. You can select a symbol by clicking on it with your mouse or trackpad. In this task, the aim is to win as many points as possible. You will begin the task with 100 points. Some symbols, if you choose them, will result in winning 20 points. Some symbols, if you choose them, will result in losing 20 points. Some symbols, if you choose them, will result in no change. After you make your choice the screen will immediately tell you if you've won or lost any points. It's your job to choose the symbol you believe is most likely to win points or least likely to lose points. The best symbol won't always result in winning (or not losing) points- it will just result in winning (or not losing) points more frequently than the other symbol.

On the next page, there will be some simple questions to check you understand these instructions.

To check your understanding of the task, please answer the below questions. If you are unsure of any and give an incorrect answer, you will see the instructions again and have the chance to complete these questions again.

1.) What is the aim of the task, and how do you select symbols?

- to pick the most appealing symbol (using arrow keys)
- to win as many points as possible (using arrow keys)
- **to win as many points as possible (using your mouse/trackpad) [correct answer]**
- to pick the most appealing symbol (using your mouse/trackpad)

2.) Will a symbol always result in the same outcome?

- Yes - the best symbol always wins points/avoids losing points
- **No - the best symbol will win points/avoid losing points more frequently than other symbols [correct answer]**
- No - the symbols have random outcomes

3.) How many points do you start with?

- 0
- **100 [correct answer]**
- 3000

## Statistical packages used

- Alboukadel Kassambara (2021). rstatix: Pipe-Friendly Framework for Basic Statistical Tests. R package version 0.7.0. <https://CRAN.R-project.org/package=rstatix>
- Daniel D. Sjoberg, Michael Curry, Margie Hannum, Joseph Larmarange, Karissa Whiting and Emily C. Zabor (2021). gtsummary: Presentation-Ready Data Summary and Analytic Result Tables. R package version 1.4.1. <https://CRAN.R-project.org/package=gtsummary>
- Douglas Bates and Martin Maechler (2019). Matrix: Sparse and Dense Matrix Classes and Methods. R package version 1.2-17. <https://CRAN.R-project.org/package=Matrix>
- Douglas Bates, Martin Maechler, Ben Bolker, Steve Walker (2015). Fitting Linear Mixed-Effects Models Using lme4. *Journal of Statistical Software*, 67(1), 1-48. doi:10.18637/jss.v067.i01.
- H. Wickham. ggplot2: Elegant Graphics for Data Analysis. Springer-Verlag New York, 2016.
- Hadley Wickham (2019). stringr: Simple, Consistent Wrappers for Common String Operations. R package version 1.4.0. <https://CRAN.R-project.org/package=stringr>
- Hadley Wickham (2021). forcats: Tools for Working with Categorical Variables (Factors). R package version 0.5.1. <https://CRAN.R-project.org/package=forcats>
- Hadley Wickham (2021). tidyr: Tidy Messy Data. R package version 1.1.3. <https://CRAN.R-project.org/package=tidyr>
- Hadley Wickham and Jim Hester (2020). readr: Read Rectangular Text Data. R package version 1.4.0. <https://CRAN.R-project.org/package=readr>
- Hadley Wickham, Romain François, Lionel Henry and Kirill Müller (2021). dplyr: A Grammar of Data Manipulation. R package version 1.0.6. <https://CRAN.R-project.org/package=dplyr>
- Jacob Kaplan (2020). fastDummies: Fast Creation of Dummy (Binary) Columns and Rows from Categorical Variables. R package version 1.6.3. <https://CRAN.R-project.org/package=fastDummies>
- Kirill Müller and Hadley Wickham (2021). tibble: Simple Data Frames. R package version 3.1.2. <https://CRAN.R-project.org/package=tibble>
- Kuznetsova A, Brockhoff PB, Christensen RHB (2017). "lmerTest Package: Tests in Linear Mixed Effects Models." *Journal of Statistical Software*, 82(13), 1-26. doi: 10.18637/jss.v082.i13 (URL:<https://doi.org/10.18637/jss.v082.i13>).
- Lemon, J. (2006) Plotrix: a package in the red light district of R. *R-News*, 6(4): 8-12.
- Lionel Henry and Hadley Wickham (2020). purrr: Functional Programming Tools. R package version 0.3.4. <https://CRAN.R-project.org/package=purrr>
- Long JA (2020). jtools: Analysis and Presentation of Social Scientific Data. R package version 2.1.0, <URL:<https://cran.r-project.org/package=jtools>>.
- Makowski, D. (2018). The Psycho Package: An Efficient and Publishing-Oriented Workflow for Psychological Science. *Journal of Open Source Software*, 3(22), 470. Available from <https://github.com/neuropsychology/psycho.R>
- Makowski, D., Ben-Shachar, M.S., Patil, I. & Lüdtke, D. (2020). Automated Results Reporting as a Practical Tool to Improve Reproducibility and Methodological Best Practices Adoption. CRAN. Available from <https://github.com/easystats/report>. doi: .

- R Core Team (2019). R: A language and environment for statistical computing. R Foundation for Statistical Computing, Vienna, Austria. URL <https://www.R-project.org/>.
- Richard Iannone, Joe Cheng and Barret Schloerke (2021). gt: Easily Create Presentation-Ready Display Tables. R package version 0.3.0. <https://CRAN.R-project.org/package=gt>
- Thomas Lin Pedersen (2020). patchwork: The Composer of Plots. R package version 1.1.1. <https://CRAN.R-project.org/package=patchwork>
- Wickham et al., (2019). Welcome to the tidyverse. Journal of Open Source Software, 4(43), 1686, <https://doi.org/10.21105/joss.01686>
- Yihui Xie (2021). knitr: A General-Purpose Package for Dynamic Report Generation in R. R package version 1.33.
- Yves Rosseel (2012). lavaan: An R Package for Structural Equation Modeling. Journal of Statistical Software, 48(2), 1-36. <https://doi.org/10.18637/jss.v048.i02>

# Supplementary Table S1

## Characteristics of participants by medication group

|                                                                    | Overall, N = 2,043 | Neither, N = 1,725 | Statin, N = 81 | Both, N = 111 | BP, N = 126   |
|--------------------------------------------------------------------|--------------------|--------------------|----------------|---------------|---------------|
| <b>Age</b>                                                         | 45.09 (14.49)      | 42.87 (13.94)      | 58.16 (11.03)  | 60.59 (7.69)  | 53.52 (12.44) |
| <b>Gender</b>                                                      |                    |                    |                |               |               |
| Female                                                             | 1,216 (60%)        | 1,066 (62%)        | 31 (38%)       | 46 (41%)      | 73 (58%)      |
| Male                                                               | 821 (40%)          | 654 (38%)          | 50 (62%)       | 65 (59%)      | 52 (41%)      |
| Non-binary or other                                                | 6 (0.2%)           | 5 (0.2%)           | 0 (0%)         | 0 (0%)        | 1 (0.8%)      |
| <b>Ethnicity</b>                                                   |                    |                    |                |               |               |
| White                                                              | 1,802 (89%)        | 1,512 (88%)        | 73 (90%)       | 105 (95%)     | 112 (90%)     |
| Asian                                                              | 99 (4.9%)          | 91 (5.3%)          | 5 (6.2%)       | 1 (0.9%)      | 2 (1.6%)      |
| Black                                                              | 54 (2.7%)          | 44 (2.6%)          | 2 (2.5%)       | 3 (2.7%)      | 5 (4.0%)      |
| Chinese                                                            | 19 (0.9%)          | 17 (1.0%)          | 0 (0%)         | 1 (0.9%)      | 1 (0.8%)      |
| Middle-eastern                                                     | 5 (0.2%)           | 5 (0.3%)           | 0 (0%)         | 0 (0%)        | 0 (0%)        |
| Mixed (black)                                                      | 10 (0.5%)          | 8 (0.5%)           | 0 (0%)         | 0 (0%)        | 2 (1.6%)      |
| Mixed (other)                                                      | 32 (1.6%)          | 31 (1.8%)          | 0 (0%)         | 0 (0%)        | 1 (0.8%)      |
| Not reported                                                       | 11 (0.5%)          | 8 (0.5%)           | 1 (1.2%)       | 0 (0%)        | 2 (1.6%)      |
| <b>English as first language</b>                                   |                    |                    |                |               |               |
| Yes                                                                | 1,845 (90%)        | 1,542 (89%)        | 76 (94%)       | 109 (98%)     | 118 (94%)     |
| No                                                                 | 198 (10%)          | 183 (11%)          | 5 (6%)         | 2 (2%)        | 8 (6%)        |
| <b>Education</b>                                                   |                    |                    |                |               |               |
| No qualifications                                                  | 20 (1.0%)          | 12 (0.7%)          | 3 (3.7%)       | 5 (4.5%)      | 0 (0%)        |
| Completed GCSE/CSE/O-levels or equivalent (at school till aged 16) | 287 (14%)          | 227 (13%)          | 16 (20%)       | 19 (17%)      | 25 (20%)      |
| Completed post-16 vocational course                                | 113 (5.5%)         | 89 (5.2%)          | 4 (4.9%)       | 13 (12%)      | 7 (5.6%)      |
| A-levels or equivalent (at school till aged 18)                    | 419 (21%)          | 362 (21%)          | 16 (20%)       | 16 (14%)      | 25 (20%)      |
| Undergraduate degree or professional qualification                 | 844 (41%)          | 726 (42%)          | 26 (32%)       | 41 (37%)      | 51 (40%)      |
| Postgraduate degree                                                | 360 (18%)          | 309 (18%)          | 16 (20%)       | 17 (15%)      | 18 (14%)      |
| <b>Annual household income</b>                                     |                    |                    |                |               |               |
| Under £16,000                                                      | 326 (16%)          | 286 (17%)          | 12 (15%)       | 15 (14%)      | 13 (10%)      |
| £16,000 - £29,999                                                  | 535 (26%)          | 439 (25%)          | 26 (32%)       | 40 (36%)      | 30 (24%)      |
| £30,000 - £59,999                                                  | 712 (35%)          | 589 (34%)          | 30 (37%)       | 36 (32%)      | 57 (45%)      |
| Over £60,000                                                       | 355 (17%)          | 310 (18%)          | 11 (14%)       | 15 (14%)      | 19 (15%)      |
| Not reported                                                       | 115 (5.6%)         | 101 (5.9%)         | 2 (2.5%)       | 5 (4.5%)      | 7 (5.6%)      |
| <b>Workhours</b>                                                   |                    |                    |                |               |               |
| Full-time                                                          | 540 (26%)          | 469 (27%)          | 15 (19%)       | 23 (21%)      | 33 (26%)      |
| Part-time                                                          | 391 (19%)          | 345 (20%)          | 13 (16%)       | 11 (9.9%)     | 22 (17%)      |
| Not at all                                                         | 1,112 (54%)        | 911 (53%)          | 53 (65%)       | 77 (69%)      | 71 (56%)      |
| <b>Current MDD diagnosis</b>                                       | 203 (9.9%)         | 167 (9.7%)         | 8 (9.9%)       | 10 (9.0%)     | 18 (14%)      |

|                                                                                                  |               |               |               |               |               |
|--------------------------------------------------------------------------------------------------|---------------|---------------|---------------|---------------|---------------|
| <b>Current GAD diagnosis</b>                                                                     | 189 (9.3%)    | 156 (9.0%)    | 4 (4.9%)      | 14 (13%)      | 15 (12%)      |
| <b>No past psychiatric history</b>                                                               | 1,371 (67%)   | 1,177 (68%)   | 52 (64%)      | 58 (52%)      | 84 (67%)      |
| <b>Current psychological therapy</b>                                                             | 317 (16%)     | 270 (16%)     | 13 (16%)      | 13 (12%)      | 21 (17%)      |
| <b>Current antidepressant use</b>                                                                | 271 (13%)     | 216 (13%)     | 16 (20%)      | 18 (16%)      | 21 (17%)      |
| <b>Social Distancing due to COVID-19 (Phase One)</b>                                             |               |               |               |               |               |
| Leaving the house as normal                                                                      | 20 (1.0%)     | 16 (0.9%)     | 2 (2.5%)      | 0 (0%)        | 2 (1.6%)      |
| Leaving the house as normal but practising social distancing where possible                      | 460 (23%)     | 399 (23%)     | 18 (22%)      | 19 (17%)      | 24 (19%)      |
| Leaving the house for essentials supplies and exercise only                                      | 1,222 (60%)   | 1,028 (60%)   | 48 (59%)      | 69 (62%)      | 77 (61%)      |
| Shielding with access to outside space                                                           | 300 (15%)     | 244 (14%)     | 12 (15%)      | 22 (20%)      | 22 (17%)      |
| Shielding with no access to outside space                                                        | 41 (2.0%)     | 38 (2.2%)     | 1 (1.2%)      | 1 (0.9%)      | 1 (0.8%)      |
| <b>Social Distancing due to COVID-19 (Phase Two)</b>                                             |               |               |               |               |               |
| Leaving the house as normal                                                                      | 47 (2.4%)     | 42 (2.6%)     | 0 (0%)        | 2 (1.7%)      | 3 (3.9%)      |
| Leaving the house as normal but practising social distancing where possible                      | 677 (35%)     | 594 (37%)     | 26 (24%)      | 35 (30%)      | 22 (29%)      |
| Leaving the house for essentials supplies and exercise only                                      | 955 (50%)     | 792 (49%)     | 58 (54%)      | 64 (54%)      | 41 (54%)      |
| Shielding with access to outside space                                                           | 218 (11%)     | 171 (11%)     | 21 (20%)      | 17 (14%)      | 9 (12%)       |
| Shielding with no access to outside space                                                        | 26 (1.4%)     | 23 (1.4%)     | 2 (1.9%)      | 0 (0%)        | 1 (1.3%)      |
| <b>Social Distancing due to COVID-19 (Phase Three)</b>                                           |               |               |               |               |               |
| Leaving the house as normal                                                                      | 129 (7.0%)    | 113 (7.4%)    | 4 (3.8%)      | 8 (6.7%)      | 4 (5.3%)      |
| Leaving the house to socialise, but practising social distancing where possible                  | 538 (29%)     | 469 (31%)     | 19 (18%)      | 33 (28%)      | 17 (23%)      |
| Leaving the house for essential responsibilities but practising social distancing where possible | 625 (34%)     | 512 (33%)     | 38 (36%)      | 47 (39%)      | 28 (37%)      |
| Leaving the house for essentials supplies and exercise only                                      | 424 (23%)     | 344 (22%)     | 33 (31%)      | 24 (20%)      | 23 (31%)      |
| Shielding with access to outside space                                                           | 105 (5.7%)    | 84 (5.5%)     | 10 (9.4%)     | 8 (6.7%)      | 3 (4.0%)      |
| Shielding with no access to outside space                                                        | 10 (0.5%)     | 8 (0.5%)      | 2 (1.9%)      | 0 (0%)        | 0 (0%)        |
| <b>Social Distancing due to COVID-19 (Phase Four)</b>                                            |               |               |               |               |               |
| Leaving the house as normal                                                                      | 59 (3.5%)     | 50 (3.5%)     | 3 (3.0%)      | 4 (3.4%)      | 2 (2.7%)      |
| Leaving the house to socialise, but practising social distancing where possible                  | 58 (3.4%)     | 53 (3.7%)     | 0 (0%)        | 3 (2.6%)      | 2 (2.7%)      |
| Leaving the house for essential responsibilities but practising social distancing where possible | 508 (30%)     | 456 (32%)     | 15 (15%)      | 19 (16%)      | 18 (25%)      |
| Leaving the house for essentials supplies and exercise only                                      | 928 (54%)     | 739 (52%)     | 67 (67%)      | 74 (64%)      | 48 (66%)      |
| Shielding with access to outside space                                                           | 133 (7.8%)    | 101 (7.1%)    | 13 (13%)      | 16 (14%)      | 3 (4.1%)      |
| Shielding with no access to outside space                                                        | 19 (1.1%)     | 17 (1.2%)     | 2 (2.0%)      | 0 (0%)        | 0 (0%)        |
| <b>Depressive symptoms (CESD)</b>                                                                |               |               |               |               |               |
| Phase One                                                                                        | 17.65 (12.34) | 18.02 (12.36) | 13.96 (10.46) | 15.18 (12.88) | 17.01 (12.20) |
| Phase Two                                                                                        | 16.76 (12.27) | 17.14 (12.32) | 13.18 (10.23) | 15.09 (12.86) | 15.43 (11.79) |
| Phase Three                                                                                      | 16.83 (12.62) | 17.10 (12.66) | 14.20 (11.87) | 15.27 (12.94) | 16.41 (12.16) |
| Phase Four                                                                                       | 18.51 (12.80) | 18.91 (12.90) | 16.59 (11.87) | 15.68 (12.16) | 17.17 (12.28) |
| <b>Anxiety symptoms (GAD7)</b>                                                                   |               |               |               |               |               |
| Phase One                                                                                        | 5.65 (5.49)   | 5.88 (5.53)   | 3.57 (4.17)   | 3.97 (4.98)   | 5.36 (5.50)   |
| Phase Two                                                                                        | 5.01 (5.11)   | 5.18 (5.16)   | 2.92 (3.39)   | 4.01 (4.87)   | 5.00 (5.18)   |

|                                          |               |               |               |               |               |
|------------------------------------------|---------------|---------------|---------------|---------------|---------------|
| Phase Three                              | 4.97 (5.21)   | 5.10 (5.25)   | 3.31 (4.04)   | 3.92 (5.16)   | 5.27 (5.21)   |
| Phase Four                               | 5.51 (5.55)   | 5.70 (5.59)   | 3.95 (4.86)   | 3.85 (4.67)   | 5.64 (5.72)   |
| <b>Loneliness (UCLA)</b>                 |               |               |               |               |               |
| Phase One                                | 5.12 (1.93)   | 5.17 (1.93)   | 5.01 (1.69)   | 4.80 (1.98)   | 4.67 (1.92)   |
| Phase Two                                | 5.11 (1.89)   | 5.17 (1.89)   | 4.84 (1.83)   | 4.79 (1.92)   | 4.75 (1.86)   |
| Phase Three                              | 4.98 (1.92)   | 5.03 (1.93)   | 4.92 (1.91)   | 4.65 (1.86)   | 4.68 (1.82)   |
| Phase Four                               | 5.34 (2.00)   | 5.38 (2.01)   | 5.08 (1.98)   | 5.03 (1.91)   | 5.38 (2.07)   |
| <b>Social Interaction (adapted ESLA)</b> |               |               |               |               |               |
| Phase One                                | 17.02 (5.45)  | 17.14 (5.46)  | 16.06 (5.57)  | 16.12 (4.67)  | 16.77 (5.75)  |
| Phase Two                                | 18.73 (5.21)  | 18.81 (5.26)  | 17.75 (4.89)  | 18.40 (4.82)  | 18.49 (5.07)  |
| Phase Three                              | 18.18 (5.16)  | 18.20 (5.09)  | 17.57 (5.33)  | 18.08 (5.44)  | 18.38 (5.64)  |
| Phase Four                               | 17.17 (5.08)  | 17.20 (5.07)  | 17.22 (5.36)  | 16.98 (4.78)  | 16.82 (5.25)  |
| <b>Anhedonia (SHAPS)</b>                 |               |               |               |               |               |
| Phase Two                                | 1.69 (2.56)   | 1.70 (2.60)   | 1.63 (2.26)   | 1.69 (2.28)   | 1.53 (2.41)   |
| Phase Three                              | 1.71 (2.75)   | 1.74 (2.78)   | 1.33 (2.19)   | 1.59 (2.74)   | 1.75 (2.76)   |
| Phase Four                               | 2.02 (2.90)   | 2.04 (2.94)   | 1.79 (2.36)   | 2.15 (3.19)   | 1.73 (2.29)   |
| <b>Trait Anxiety</b>                     | 42.58 (12.85) | 43.05 (12.89) | 37.90 (11.14) | 39.41 (12.05) | 41.98 (13.13) |

*Unless otherwise stated, all measures are from Phase One of data collection.*



# Supplementary Table S2

## Results for covariate identification analysis

Where multiple potential covariates assessed overlapping constructs, final covariates were chosen based on either greater sensitivity (i.e. continuous variables), greater theoretical/mechanistic plausibility (e.g. antidepressant use) or greater associations/significance after controlling for other covariates. Covariates included in fully corrected models are in bold.

|                                                                                                                       |                          | B              | SE             | Z value     | p                  |
|-----------------------------------------------------------------------------------------------------------------------|--------------------------|----------------|----------------|-------------|--------------------|
| <b>Household Income</b>                                                                                               | <b>Neither vs Statin</b> | <b>0.30458</b> | <b>0.32857</b> | <b>0.93</b> | <b>0.354</b>       |
|                                                                                                                       | <b>Neither vs BP</b>     | <b>0.67773</b> | <b>0.30480</b> | <b>2.22</b> | <b>0.026 *</b>     |
|                                                                                                                       | <b>Neither vs Both</b>   | <b>0.44321</b> | <b>0.29665</b> | <b>1.49</b> | <b>0.135</b>       |
| Work hours                                                                                                            | Neither vs Statin        | 0.40118        | 0.30076        | 1.33        | 0.1822             |
|                                                                                                                       | Neither vs BP            | -0.10970       | 0.21710        | -0.51       | 0.6134             |
|                                                                                                                       | Neither vs Both          | 0.19250        | 0.25331        | 0.76        | 0.4473             |
| English as first language                                                                                             | Neither vs Statin        | 0.04650        | 0.48823        | 0.10        | 0.92412            |
|                                                                                                                       | Neither vs BP            | -0.19600       | 0.38572        | -0.51       | 0.61136            |
|                                                                                                                       | Neither vs Both          | -1.07942       | 0.73128        | -1.48       | 0.13993            |
| Education                                                                                                             | Neither vs Statin        | -0.36308       | 0.29748        | -1.22       | 0.222              |
|                                                                                                                       | Neither vs BP            | -0.23631       | 0.24001        | -0.98       | 0.325              |
|                                                                                                                       | Neither vs Both          | -0.05182       | 0.29056        | -0.18       | 0.858              |
| <b>Current antidepressant use</b>                                                                                     | <b>Neither vs Statin</b> | <b>0.8631</b>  | <b>0.3046</b>  | <b>2.83</b> | <b>0.00461 **</b>  |
|                                                                                                                       | <b>Neither vs BP</b>     | <b>0.4808</b>  | <b>0.2588</b>  | <b>1.86</b> | <b>0.06320 .</b>   |
|                                                                                                                       | <b>Neither vs Both</b>   | <b>0.5990</b>  | <b>0.2866</b>  | <b>2.09</b> | <b>0.03664 *</b>   |
| Current psychological therapy                                                                                         | Neither vs Statin        | 0.48560        | 0.32286        | 1.50        | 0.1326             |
|                                                                                                                       | Neither vs BP            | 0.31181        | 0.25921        | 1.20        | 0.2290             |
|                                                                                                                       | Neither vs Both          | 0.15639        | 0.31794        | 0.49        | 0.6228             |
| Current MDD diagnosis                                                                                                 | Neither vs Statin        | 0.77082        | 0.40148        | 1.92        | 0.0549 .           |
|                                                                                                                       | Neither vs BP            | 0.90778        | 0.28566        | 3.18        | 0.0015 **          |
|                                                                                                                       | Neither vs Both          | 0.76416        | 0.36718        | 2.08        | 0.0374*            |
| Current GAD diagnosis                                                                                                 | Neither vs Statin        | -0.00326       | 0.53296        | -0.01       | 0.99512            |
|                                                                                                                       | Neither vs BP            | 0.65780        | 0.30249        | 2.17        | 0.02966 *          |
|                                                                                                                       | Neither vs Both          | 1.10199        | 0.32708        | 3.37        | 0.00075 ***        |
| <b>History of mental health diagnosis</b>                                                                             | <b>Neither vs Statin</b> | <b>0.51806</b> | <b>0.24831</b> | <b>2.09</b> | <b>0.037 *</b>     |
|                                                                                                                       | <b>Neither vs BP</b>     | <b>0.23436</b> | <b>0.20348</b> | <b>1.15</b> | <b>0.249</b>       |
|                                                                                                                       | <b>Neither vs Both</b>   | <b>1.01697</b> | <b>0.21104</b> | <b>4.82</b> | <b>1.4e-06 ***</b> |
| Isolation level                                                                                                       | Neither vs Statin        | 0.02644        | 0.23929        | 0.11        | 0.91201            |
|                                                                                                                       | Neither vs BP            | -0.09158       | 0.19376        | -0.47       | 0.63647            |
|                                                                                                                       | Neither vs Both          | -0.08777       | 0.21207        | -0.41       | 0.67896            |
| <b>CESD</b>                                                                                                           | <b>Neither vs Statin</b> | <b>0.8599</b>  | <b>1.3648</b>  | <b>0.63</b> | <b>0.529</b>       |
|                                                                                                                       | <b>Neither vs BP</b>     | <b>1.8006</b>  | <b>1.1009</b>  | <b>1.64</b> | <b>0.102</b>       |
|                                                                                                                       | <b>Neither vs Both</b>   | <b>2.4547</b>  | <b>1.2011</b>  | <b>2.04</b> | <b>0.041 *</b>     |
| GAD7                                                                                                                  | Neither vs Statin        | -0.1583        | 0.6061         | -0.26       | 0.79               |
|                                                                                                                       | Neither vs BP            | 0.7275         | 0.4889         | 1.49        | 0.14               |
|                                                                                                                       | Neither vs Both          | 0.4150         | 0.5334         | 0.78        | 0.44               |
| ESLA                                                                                                                  | Neither vs Statin        | 0.62317        | 0.61355        | 1.02        | 0.3099             |
|                                                                                                                       | Neither vs BP            | 0.59627        | 0.49492        | 1.20        | 0.2284             |
|                                                                                                                       | Neither vs Both          | 0.86872        | 0.53993        | 1.61        | 0.1078             |
| UCLA                                                                                                                  | Neither vs Statin        | 0.33023        | 0.22093        | 1.49        | 0.135              |
|                                                                                                                       | Neither vs BP            | -0.18239       | 0.17821        | -1.02       | 0.306              |
|                                                                                                                       | Neither vs Both          | 0.17958        | 0.19377        | 0.93        | 0.354              |
| SHAPS (Timepoint 2 – first measurement)                                                                               | Neither vs Statin        | 0.34013        | 0.30707        | 1.11        | 0.268              |
|                                                                                                                       | Neither vs BP            | 0.14283        | 0.24827        | 0.58        | 0.565              |
|                                                                                                                       | Neither vs Both          | 0.49892        | 0.26751        | 1.87        | 0.062 .            |
| STAIT                                                                                                                 | Neither vs Statin        | -0.3293        | 1.4276         | -0.23       | 0.82               |
|                                                                                                                       | Neither vs BP            | 1.8301         | 1.1515         | 1.59        | 0.11               |
|                                                                                                                       | Neither vs Both          | 1.6814         | 1.2569         | 1.34        | 0.18               |
| History of mental health diagnosis – controlling for antidepressant use and CESD score                                | Neither vs Statin        | 0.31024        | 0.28834        | 1.08        | 0.2819             |
|                                                                                                                       | Neither vs BP            | 0.04614        | 0.23764        | 0.19        | 0.8460             |
|                                                                                                                       | Neither vs Both          | 1.02052        | 0.23827        | 4.28        | 1.8e-05 ***        |
| Current MDD diagnosis – controlling for antidepressant use and CESD score and past history of mental health diagnosis | Neither vs Statin        | 0.36567        | 0.50970        | 0.72        | 0.473              |
|                                                                                                                       | Neither vs BP            | 0.91603        | 0.40799        | 2.25        | 0.025 *            |
|                                                                                                                       | Neither vs Both          | 0.05082        | 0.48467        | 0.10        | 0.916              |
|                                                                                                                       | Neither vs Statin        | -0.63898       | 0.58813        | -1.09       | 0.2773             |

|                                                                                                                       |                          |                 |                |              |                  |
|-----------------------------------------------------------------------------------------------------------------------|--------------------------|-----------------|----------------|--------------|------------------|
| Current GAD diagnosis – controlling for antidepressant use and CESD score and past history of mental health diagnosis | Neither vs BP            | 0.43955         | 0.35960        | 1.22         | 0.2216           |
|                                                                                                                       | Neither vs Both          | 0.64593         | 0.38665        | 1.67         | 0.0948 .         |
| Tobacco Use                                                                                                           | Neither vs Statin        | 0.34441         | 0.24329        | 1.42         | 0.15688          |
|                                                                                                                       | Neither vs BP            | -0.15077        | 0.20499        | -0.74        | 0.46203          |
|                                                                                                                       | Neither vs Both          | 0.31948         | 0.21215        | 1.51         | 0.13209          |
| <b>Alcohol Use</b>                                                                                                    | <b>Neither vs Statin</b> | <b>-0.53869</b> | <b>0.24192</b> | <b>-2.23</b> | <b>0.02597 *</b> |
|                                                                                                                       | <b>Neither vs BP</b>     | <b>-0.36024</b> | <b>0.19440</b> | <b>-1.85</b> | <b>0.06387 .</b> |
|                                                                                                                       | <b>Neither vs Both</b>   | <b>-0.19113</b> | <b>0.21789</b> | <b>-0.88</b> | <b>0.38037</b>   |
| <b>Weekly Physical Activity</b>                                                                                       | <b>Neither vs Statin</b> | <b>-0.14966</b> | <b>0.27199</b> | <b>-0.55</b> | <b>0.582</b>     |
|                                                                                                                       | <b>Neither vs BP</b>     | <b>-0.35644</b> | <b>0.20776</b> | <b>-1.72</b> | <b>0.086 .</b>   |
|                                                                                                                       | <b>Neither vs Both</b>   | <b>-0.57081</b> | <b>0.22163</b> | <b>-2.58</b> | <b>0.010 *</b>   |

## Supplementary Table S3

### Results for all analyses and sensitivity checks

#### Notes

- Corrected for demographics (minimally adjusted) = Age, gender, ethnicity, and household income
- Corrected for all covariates (maximally adjusted) = Age, gender, ethnicity, household income, current antidepressant use, current depression scores, presence of past psychiatric history, weekly units of alcohol and weekly hours of physical activity
- Cells with significant results ( $p < 0.05$ ) are shaded blue
- Primary corrected analyses (reported within the main manuscript, as appropriate) are within - - - bordered cells

| Outcome             | Groups             | Full dataset (n=2033)                                                                                                                                                           |                                                                                                             |                                                                                                                                                                                      |                                                                                                         |                                                                                                                                                                                      |                                                                                                         | Sensitivity Checks                                                                                                                                                                   |                                                                                                         |                                                                                                                                                                                      |                                                                                                         |
|---------------------|--------------------|---------------------------------------------------------------------------------------------------------------------------------------------------------------------------------|-------------------------------------------------------------------------------------------------------------|--------------------------------------------------------------------------------------------------------------------------------------------------------------------------------------|---------------------------------------------------------------------------------------------------------|--------------------------------------------------------------------------------------------------------------------------------------------------------------------------------------|---------------------------------------------------------------------------------------------------------|--------------------------------------------------------------------------------------------------------------------------------------------------------------------------------------|---------------------------------------------------------------------------------------------------------|--------------------------------------------------------------------------------------------------------------------------------------------------------------------------------------|---------------------------------------------------------------------------------------------------------|
|                     |                    | Uncorrected                                                                                                                                                                     |                                                                                                             | Corrected for demographics                                                                                                                                                           |                                                                                                         | Corrected for all covariates                                                                                                                                                         |                                                                                                         | Excluding non-lipophilic (n=2011)                                                                                                                                                    |                                                                                                         | Excluding small gender groups (n=2027)                                                                                                                                               |                                                                                                         |
|                     |                    | ANCOVA                                                                                                                                                                          | Linear regression                                                                                           | ANCOVA                                                                                                                                                                               | Linear regression                                                                                       | ANCOVA                                                                                                                                                                               | Linear regression                                                                                       | ANCOVA                                                                                                                                                                               | Linear regression                                                                                       | ANCOVA                                                                                                                                                                               | Linear regression                                                                                       |
|                     |                    | Corrected for all covariates                                                                                                                                                    |                                                                                                             |                                                                                                                                                                                      |                                                                                                         |                                                                                                                                                                                      |                                                                                                         |                                                                                                                                                                                      |                                                                                                         |                                                                                                                                                                                      |                                                                                                         |
| All emotions - UBHR | All                | Group: F(3) = 7.78, p < .001; Eta2 (partial) = 0.01, 90% CI [4.29e-03, 0.02]<br><br>Interaction: F(18) = 6.08, p < .001; Eta2 (partial) = 2.88e-03, 90% CI [1.64e-03, 3.38e-03] | N/A                                                                                                         | Group: F(3) = 4.44, p = 0.004; Eta2 (partial) = 6.74e-03, 90% CI [1.28e-03, 0.01]<br><br>Interaction: F(18) = 6.08, p < .001; Eta2 (partial) = 2.88e-03, 90% CI [1.64e-03, 3.38e-03] | N/A                                                                                                     | Group: F(3) = 3.44, p = 0.016; Eta2 (partial) = 5.57e-03, 90% CI [5.67e-04, 0.01]<br><br>Interaction: F(18) = 5.41, p < .001; Eta2 (partial) = 2.64e-03, 90% CI [1.41e-03, 3.09e-03] | N/A                                                                                                     | Group: F(3) = 3.18, p = 0.023; Eta2 (partial) = 5.21e-03, 90% CI [3.85e-04, 0.01]<br><br>Interaction: F(18) = 4.77, p < .001; Eta2 (partial) = 2.36e-03, 90% CI [1.17e-03, 2.76e-03] | N/A                                                                                                     | Group: F(3) = 3.41, p = 0.017; Eta2 (partial) = 5.53e-03, 90% CI [5.43e-04, 0.01]<br><br>Interaction: F(18) = 5.40, p < .001; Eta2 (partial) = 2.64e-03, 90% CI [1.41e-03, 3.10e-03] | N/A                                                                                                     |
|                     | All                | F(3) = 10.36, p < .001; Eta2 (partial) = 0.02, 90% CI [6.85e-03, 0.02]                                                                                                          | N/A                                                                                                         | F(3) = 5.17, p = 0.001; Eta2 (partial) = 7.77e-03, 90% CI [1.87e-03, 0.01]                                                                                                           | N/A                                                                                                     | F(3) = 4.52, p = 0.004; Eta2 (partial) = 7.23e-03, 90% CI [1.42e-03, 0.01]                                                                                                           | N/A                                                                                                     | F(3) = 4.21, p = 0.006; Eta2 (partial) = 6.80e-03, 90% CI [1.17e-03, 0.01]                                                                                                           | N/A                                                                                                     | F(3) = 4.45, p = 0.004; Eta2 (partial) = 7.12e-03, 90% CI [1.36e-03, 0.01]                                                                                                           | N/A                                                                                                     |
| Angry - UBHR        | Statins vs Neither | F(1) = 18.64, p < .001; Eta2 (partial) = 0.01, 90% CI [4.04e-03, 0.02]                                                                                                          | Beta = -0.06, 95% CI [-0.09, -0.03], t(5691) = -4.29, p < .001; Std. beta = -0.40, 95% CI [-0.58, -0.21]    | F(1) = 11.66, p < .001; Eta2 (partial) = 6.64e-03, 90% CI [1.78e-03, 0.01]                                                                                                           | beta = -0.05, 95% CI [-0.08, -0.02], t(5682) = -3.28, p < .01; Std. beta = -0.31, 95% CI [-0.49, -0.12] | F(1) = 9.19, p = 0.002; Eta2 (partial) = 5.55e-03, 90% CI [1.16e-03, 0.01]                                                                                                           | beta = -0.05, 95% CI [-0.08, -0.02], t(5505) = -3.00, p < .01; Std. beta = -0.29, 95% CI [-0.48, -0.10] | F(1) = 7.07, p = 0.008; Eta2 (partial) = 4.30e-03, 90% CI [6.23e-04, 0.01]                                                                                                           | beta = -0.05, 95% CI [-0.08, -0.01], t(5439) = -2.67, p < .01; Std. beta = -0.29, 95% CI [-0.50, -0.08] | F(1) = 9.19, p = 0.002; Eta2 (partial) = 5.55e-03, 90% CI [1.16e-03, 0.01]                                                                                                           | beta = -0.05, 95% CI [-0.08, -0.02], t(5492) = -2.99, p < .01; Std. beta = -0.29, 95% CI [-0.48, -0.10] |
|                     | BP vs neither      | F(1) = 2.26, p = 0.133; Eta2 (partial) = 1.25e-03, 90% CI [0.00, 5.47e-03]                                                                                                      | beta = -0.02, 95% CI [-0.04, 5.51e-03], t(5691) = -1.49, p = 0.135; Std. beta = -0.11, 95% CI [-0.26, 0.04] | F(1) = 1.09, p = 0.297; Eta2 (partial) = 6.06e-04, 90% CI [0.00, 4.01e-03]                                                                                                           | beta = -0.01, 95% CI [-0.04, 0.01], t(5682) = -0.97, p = 0.332; Std. beta = -0.07, 95% CI [-0.22, 0.08] | F(1) = 1.37, p = 0.242; Eta2 (partial) = 8.14e-04, 90% CI [0.00, 4.69e-03]                                                                                                           | beta = -0.01, 95% CI [-0.04, 0.01], t(5505) = -1.09, p = 0.276; Std. beta = -0.09, 95% CI [-0.24, 0.07] | F(1) = 1.37, p = 0.242; Eta2 (partial) = 8.15e-04, 90% CI [0.00, 4.69e-03]                                                                                                           | beta = -0.01, 95% CI [-0.04, 0.01], t(5439) = -1.12, p = 0.264; Std. beta = -0.09, 95% CI [-0.24, 0.07] | F(1) = 1.14, p = 0.286; Eta2 (partial) = 6.76e-04, 90% CI [0.00, 4.35e-03]                                                                                                           | beta = -0.01, 95% CI [-0.04, 0.01], t(5492) = -1.12, p = 0.323; Std. beta = -0.08, 95% CI [-0.23, 0.08] |
|                     | Both vs neither    | F(1) = 13.22, p < .001; Eta2 (partial) = 7.39e-03, 90% CI [2.22e-03, 0.02]                                                                                                      | (beta = -0.05, 95% CI [-0.07, -0.02], t(5691) = -3.63, p < .001; Std. beta = -0.29, 95% CI [-0.44, -0.13])  | F(1) = 7.44, p = 0.006; Eta2 (partial) = 4.19e-03, 90% CI [6.59e-04, 0.01]                                                                                                           | beta = -0.03, 95% CI [-0.06, -0.02], t(5682) = -2.52, p < .05; Std. beta = -0.21, 95% CI [-0.37, -0.05] | F(1) = 6.48, p = 0.011; Eta2 (partial) = 3.87e-03, 90% CI [4.82e-04, 0.01]                                                                                                           | beta = -0.03, 95% CI [-0.06, -0.02], t(5505) = -2.42, p < .05; Std. beta = -0.21, 95% CI [-0.37, -0.04] | F(1) = 7.18, p = 0.007; Eta2 (partial) = 4.30e-03, 90% CI [6.40e-04, 0.01]                                                                                                           | beta = -0.03, 95% CI [-0.06, -0.02], t(5439) = -2.55, p < .05; Std. beta = -0.22, 95% CI [-0.39, -0.05] | F(1) = 6.50, p = 0.011; Eta2 (partial) = 3.89e-03, 90% CI [4.86e-04, 0.01]                                                                                                           | beta = -0.03, 95% CI [-0.06, -0.02], t(5492) = -2.41, p < .05; Std. beta = -0.21, 95% CI [-0.37, -0.04] |

| Outcome          | Groups                                                                     | Full dataset (n=2033)                                                                                   |                                                                                                             |                                                                                                         |                                                                                                             |                                                                                                         |                                                                                                             | Sensitivity Checks                                                                                           |                                                                                                             |                                                                                                              |                                                                                                              |
|------------------|----------------------------------------------------------------------------|---------------------------------------------------------------------------------------------------------|-------------------------------------------------------------------------------------------------------------|---------------------------------------------------------------------------------------------------------|-------------------------------------------------------------------------------------------------------------|---------------------------------------------------------------------------------------------------------|-------------------------------------------------------------------------------------------------------------|--------------------------------------------------------------------------------------------------------------|-------------------------------------------------------------------------------------------------------------|--------------------------------------------------------------------------------------------------------------|--------------------------------------------------------------------------------------------------------------|
|                  |                                                                            | Uncorrected                                                                                             |                                                                                                             | Corrected for demographics                                                                              |                                                                                                             | Corrected for all covariates                                                                            |                                                                                                             | Excluding non-lipophilic (n=2011)                                                                            |                                                                                                             | Excluding small gender groups (n=2027)                                                                       |                                                                                                              |
|                  |                                                                            | ANCOVA                                                                                                  | Linear regression                                                                                           | ANCOVA                                                                                                  | Linear regression                                                                                           | ANCOVA                                                                                                  | Linear regression                                                                                           | Corrected for all covariates                                                                                 |                                                                                                             |                                                                                                              |                                                                                                              |
|                  |                                                                            |                                                                                                         |                                                                                                             |                                                                                                         |                                                                                                             |                                                                                                         |                                                                                                             | ANCOVA                                                                                                       | Linear regression                                                                                           | ANCOVA                                                                                                       | Linear regression                                                                                            |
| Disgust - UBHR   | All                                                                        | F(3) = 0.38, p = 0.768; Eta2 (partial) = 5.76e-04, 90% CI [0.00, 1.95e-03]                              | N/A                                                                                                         | (F(3) = 0.35, p = 0.792; Eta2 (partial) = 5.31e-04, 90% CI [0.00, 1.79e-03])                            | N/A                                                                                                         | F(3) = 0.48, p = 0.698; Eta2 (partial) = 7.75e-04, 90% CI [0.00, 2.57e-03]                              | N/A                                                                                                         | F(3) = 0.31, p = 0.817; Eta2 (partial) = 5.11e-04, 90% CI [0.00, 1.71e-03]                                   | N/A                                                                                                         | F(3) = 0.49, p = 0.691; Eta2 (partial) = 7.94e-04, 90% CI [0.00, 2.63e-03]                                   | N/A                                                                                                          |
| Fear - UBHR      | All                                                                        | F(3) = 8.09, p < .001; Eta2 (partial) = 0.01, 90% CI [4.54e-03, 0.02]                                   | N/A                                                                                                         | (F(3) = 5.03, p = 0.002; Eta2 (partial) = 7.55e-03, 90% CI [1.75e-03, 0.01])                            | N/A                                                                                                         | F(3) = 3.76, p = 0.010; Eta2 (partial) = 6.00e-03, 90% CI [8.01e-04, 0.01]                              | N/A                                                                                                         | F(3) = 2.94, p = 0.032; Eta2 (partial) = 4.74e-03, 90% CI [2.12e-04, 0.01]                                   | N/A                                                                                                         | F(3) = 3.77, p = 0.010; Eta2 (partial) = 6.03e-03, 90% CI [8.10e-04, 0.01]                                   | N/A                                                                                                          |
|                  | Statin vs neither                                                          | F(1) = 13.84, p < .001; Eta2 (partial) = 7.78e-03, 90% CI [2.43e-03, 0.02]                              | beta = -0.05, 95% CI [-0.08, -0.02], t(5687) = -3.76, p < .001; Std. beta = -0.36, 95% CI [-0.54, -0.17]    | (F(1) = 9.94, p = 0.002; Eta2 (partial) = 5.64e-03, 90% CI [1.29e-03, 0.01])                            | beta = -0.04, 95% CI [-0.07, -0.02], t(5678) = -3.17, p < .01; Std. beta = -0.31, 95% CI [-0.50, -0.12])    | F(1) = 6.90, p = 0.009; Eta2 (partial) = 4.16e-03, 90% CI [5.79e-04, 0.01]                              | beta = -0.04, 95% CI [-0.07, -0.09], t(5501) = -2.62, p < .01; Std. beta = -0.26, 95% CI [-0.46, -0.07]     | F(1) = 4.37, p = 0.037; Eta2 (partial) = 2.65e-03, 90% CI [8.42e-05, 8.42e-03]                               | beta = -0.03, 95% CI [-0.07, -0.23], t(5435) = -2.10, p < .05; Std. beta = -0.23, 95% CI [-0.45, -0.02]     | F(1) = 6.93, p = 0.009; Eta2 (partial) = 4.18e-03, 90% CI [5.87e-04, 0.01]                                   | beta = -0.04, 95% CI [-0.07, -0.967e-03], t(5488) = -2.63, p < .01; Std. beta = -0.26, 95% CI [-0.46, -0.07] |
|                  | BP vs neither                                                              | (F(1) = 2.35, p = 0.125; Eta2 (partial) = 1.30e-03, 90% CI [0.00, 5.56e-03])                            | beta = -0.02, 95% CI [-0.04, 4.71e-03], t(5687) = -1.54, p = 0.125; Std. beta = -0.12, 95% CI [-0.27, 0.03] | (F(1) = 1.76, p = 0.184; Eta2 (partial) = 9.79e-04, 90% CI [0.00, 4.89e-03])                            | beta = -0.01, 95% CI [-0.04, 7.68e-03], t(5678) = -1.28, p = 0.200; Std. beta = -0.10, 95% CI [-0.25, 0.05] | F(1) = 1.69, p = 0.194; Eta2 (partial) = 1.00e-03, 90% CI [0.00, 5.11e-03])                             | beta = -0.01, 95% CI [-0.04, 8.75e-03], t(5501) = -1.21, p = 0.225; Std. beta = -0.10, 95% CI [-0.26, 0.06] | F(1) = 1.62, p = 0.203; Eta2 (partial) = 9.62e-04, 90% CI [0.00, 5.03e-03])                                  | beta = -0.01, 95% CI [-0.04, 8.95e-03], t(5435) = -1.20, p = 0.231; Std. beta = -0.10, 95% CI [-0.26, 0.06] | F(1) = 1.67, p = 0.196; Eta2 (partial) = 9.91e-04, 90% CI [0.00, 5.10e-03])                                  | beta = -0.01, 95% CI [-0.04, 8.85e-03], t(5488) = -1.21, p = 0.227; Std. beta = -0.10, 95% CI [-0.26, 0.06]  |
| Both vs neither  | F(1) = 9.97, p = 0.002; Eta2 (partial) = 5.55e-03, 90% CI [1.28e-03, 0.01] | beta = -0.04, 95% CI [-0.06, -0.01], t(5687) = -3.16, p < .01; Std. beta = -0.26, 95% CI [-0.42, -0.10] | (F(1) = 6.88, p = 0.009; Eta2 (partial) = 3.86e-03, 90% CI [5.35e-04, 0.01])                                | beta = -0.03, 95% CI [-0.05, -0.04], t(5678) = -2.49, p < .05; Std. beta = -0.21, 95% CI [-0.38, -0.04] | F(1) = 5.66, p = 0.017; Eta2 (partial) = 3.37e-03, 90% CI [3.13e-04, 9.59e-03])                             | beta = -0.03, 95% CI [-0.05, -0.04], t(5501) = -2.28, p < .05; Std. beta = -0.20, 95% CI [-0.37, -0.03] | F(1) = 5.28, p = 0.022; Eta2 (partial) = 3.16e-03, 90% CI [2.42e-04, 9.24e-03])                             | beta = -0.03, 95% CI [-0.05, -0.275e-03], t(5435) = -2.17, p < .05; Std. beta = -0.20, 95% CI [-0.37, -0.02] | F(1) = 5.69, p = 0.017; Eta2 (partial) = 3.39e-03, 90% CI [3.18e-04, 9.63e-03])                             | beta = -0.03, 95% CI [-0.05, -0.410e-03], t(5488) = -2.28, p < .05; Std. beta = -0.20, 95% CI [-0.37, -0.03] |                                                                                                              |
| Happiness - UBHR | All                                                                        | F(3) = 1.10, p = 0.350; Eta2 (partial) = 1.68e-03, 90% CI [0.00, 4.65e-03]                              | N/A                                                                                                         | (F(3) = 2.07, p = 0.103; Eta2 (partial) = 3.16e-03, 90% CI [0.00, 7.37e-03])                            | N/A                                                                                                         | F(3) = 2.05, p = 0.104; Eta2 (partial) = 3.35e-03, 90% CI [0.00, 7.80e-03])                             | N/A                                                                                                         | F(3) = 2.20, p = 0.086; Eta2 (partial) = 3.63e-03, 90% CI [0.00, 8.30e-03])                                  | N/A                                                                                                         | F(3) = 2.05, p = 0.105; Eta2 (partial) = 3.34e-03, 90% CI [0.00, 7.79e-03])                                  | N/A                                                                                                          |
| Sadness - UBHR   | All                                                                        | F(3) = 0.55, p = 0.650; Eta2 (partial) = 8.28e-04, 90% CI [0.00, 2.69e-03])                             | N/A                                                                                                         | (F(3) = 1.83, p = 0.140; Eta2 (partial) = 2.77e-03, 90% CI [0.00, 6.20e-03])                            | N/A                                                                                                         | F(3) = 1.75, p = 0.154; Eta2 (partial) = 2.83e-03, 90% CI [0.00, 6.88e-03])                             | N/A                                                                                                         | F(3) = 1.83, p = 0.140; Eta2 (partial) = 2.98e-03, 90% CI [0.00, 7.17e-03])                                  | N/A                                                                                                         | F(3) = 1.75, p = 0.155; Eta2 (partial) = 2.83e-03, 90% CI [0.00, 6.89e-03])                                  | N/A                                                                                                          |

| Outcome                              | Groups            | Full dataset (n=2033)                                                                                                                                                           |                                                                                                          |                                                                                                                                                                                      |                                                                                                         |                                                                                                                                                                                      |                                                                                                         | Sensitivity Checks                                                                                                                                                                   |                                                                                                         |                                                                                                                                                                                      |                                                                                                         |
|--------------------------------------|-------------------|---------------------------------------------------------------------------------------------------------------------------------------------------------------------------------|----------------------------------------------------------------------------------------------------------|--------------------------------------------------------------------------------------------------------------------------------------------------------------------------------------|---------------------------------------------------------------------------------------------------------|--------------------------------------------------------------------------------------------------------------------------------------------------------------------------------------|---------------------------------------------------------------------------------------------------------|--------------------------------------------------------------------------------------------------------------------------------------------------------------------------------------|---------------------------------------------------------------------------------------------------------|--------------------------------------------------------------------------------------------------------------------------------------------------------------------------------------|---------------------------------------------------------------------------------------------------------|
|                                      |                   | Uncorrected                                                                                                                                                                     |                                                                                                          | Corrected for demographics                                                                                                                                                           |                                                                                                         | Corrected for all covariates                                                                                                                                                         |                                                                                                         | Excluding non-lipophilic (n=2011)                                                                                                                                                    |                                                                                                         | Excluding small gender groups (n=2027)                                                                                                                                               |                                                                                                         |
|                                      |                   | ANCOVA                                                                                                                                                                          | Linear regression                                                                                        | ANCOVA                                                                                                                                                                               | Linear regression                                                                                       | ANCOVA                                                                                                                                                                               | Linear regression                                                                                       | Corrected for all covariates                                                                                                                                                         |                                                                                                         |                                                                                                                                                                                      |                                                                                                         |
|                                      |                   |                                                                                                                                                                                 |                                                                                                          |                                                                                                                                                                                      |                                                                                                         |                                                                                                                                                                                      |                                                                                                         | ANCOVA                                                                                                                                                                               | Linear regression                                                                                       | ANCOVA                                                                                                                                                                               | Linear regression                                                                                       |
| Surprise - UBHR                      | All               | F(3) = 3.11, p = 0.025; Eta2 (partial) = 4.74e-03, 90% CI [3.12e-04, 9.90e-03]                                                                                                  | N/A                                                                                                      | F(3) = 0.44, p = 0.724; Eta2 (partial) = 6.79e-04, 90% CI [0.00, 2.25e-03]                                                                                                           | N/A                                                                                                     | F(3) = 0.67, p = 0.572; Eta2 (partial) = 1.09e-03, 90% CI [0.00, 3.40e-03]                                                                                                           | N/A                                                                                                     | F(3) = 0.80, p = 0.494; Eta2 (partial) = 1.32e-03, 90% CI [0.00, 3.95e-03]                                                                                                           | N/A                                                                                                     | F(3) = 0.68, p = 0.566; Eta2 (partial) = 1.11e-03, 90% CI [0.00, 3.45e-03]                                                                                                           | N/A                                                                                                     |
| Neutral - UBHR                       | All               | F(3) = 1.98, p = 0.115; Eta2 (partial) = 3.00e-03, 90% CI [0.00, 7.08e-03]                                                                                                      | N/A                                                                                                      | F(3) = 0.48, p = 0.693; Eta2 (partial) = 7.41e-04, 90% CI [0.00, 2.45e-03]                                                                                                           | N/A                                                                                                     | F(3) = 0.67, p = 0.570; Eta2 (partial) = 1.09e-03, 90% CI [0.00, 3.39e-03]                                                                                                           | N/A                                                                                                     | F(3) = 0.74, p = 0.527; Eta2 (partial) = 1.21e-03, 90% CI [0.00, 3.70e-03]                                                                                                           | N/A                                                                                                     | F(3) = 0.70, p = 0.553; Eta2 (partial) = 1.13e-03, 90% CI [0.00, 3.50e-03]                                                                                                           | N/A                                                                                                     |
| Anger – misclassifications (all)     | All               | Group: F(3) = 8.47, p < .001; Eta2 (partial) = 0.01, 90% CI [4.93e-03, 0.02]<br><br>Interaction: F(15) = 3.57, p < .001; Eta2 (partial) = 1.66e-03, 90% CI [6.18e-04, 2.01e-03] | N/A                                                                                                      | Group: F(3) = 3.96, p = 0.008; Eta2 (partial) = 5.97e-03, 90% CI [9.03e-04, 0.01]<br><br>Interaction: F(15) = 3.57, p < .001; Eta2 (partial) = 1.66e-03, 90% CI [6.18e-04, 2.01e-03] | N/A                                                                                                     | Group: F(3) = 3.47, p = 0.016; Eta2 (partial) = 5.58e-03, 90% CI [5.86e-04, 0.01]<br><br>Interaction: F(15) = 3.31, p < .001; Eta2 (partial) = 1.58e-03, 90% CI [5.41e-04, 1.91e-03] | N/A                                                                                                     | Group: F(3) = 3.15, p = 0.024; Eta2 (partial) = 5.12e-03, 90% CI [3.61e-04, 0.01]<br><br>Interaction: F(15) = 3.36, p < .001; Eta2 (partial) = 1.63e-03, 90% CI [5.68e-04, 1.97e-03] | N/A                                                                                                     | Group: F(3) = 3.37, p = 0.018; Eta2 (partial) = 5.42e-03, 90% CI [5.10e-04, 0.01]<br><br>Interaction: F(15) = 3.47, p < .001; Eta2 (partial) = 1.66e-03, 90% CI [6.00e-04, 2.01e-03] | N/A                                                                                                     |
| Anger – misclassifications (disgust) | Statin vs neither | F(1) = 3.89, p = 0.049; Eta2 (partial) = 2.23e-03, 90% CI [6.23e-06, 7.46e-03]                                                                                                  | beta = 0.56, 95% CI [3.41e-03, 1.12], t(5019) = 1.97, p < .05; Std. beta = 0.17, 95% CI [1.04e-03, 0.34] | F(1) = 3.33, p = 0.068; Eta2 (partial) = 1.92e-03, 90% CI [0.00, 6.90e-03]                                                                                                           | beta = 0.54, 95% CI [-0.04, 1.11], t(5010) = 1.82, p = 0.068; Std. beta = 0.16, 95% CI [-0.01, 0.34]    | F(1) = 2.62, p = 0.105; Eta2 (partial) = 1.59e-03, 90% CI [0.00, 6.43e-03]                                                                                                           | beta = 0.49, 95% CI [-0.10, 1.08], t(4851) = 1.62, p = 0.105; Std. beta = 0.15, 95% CI [-0.03, 0.33]    | F(1) = 0.70, p = 0.403; Eta2 (partial) = 4.27e-04, 90% CI [0.00, 3.73e-03]                                                                                                           | beta = 0.28, 95% CI [-0.38, 0.94], t(4800) = 0.84, p = 0.403; Std. beta = 0.09, 95% CI [-0.12, 0.29]    | F(1) = 2.62, p = 0.106; Eta2 (partial) = 1.59e-03, 90% CI [0.00, 6.44e-03]                                                                                                           | beta = 0.49, 95% CI [-0.10, 1.08], t(4841) = 1.62, p = 0.105; Std. beta = 0.15, 95% CI [-0.03, 0.33]    |
| Anger – misclassifications (fear)    | Statin vs neither | F(1) = 8.20, p = 0.004; Eta2 (partial) = 4.72e-03, 90% CI [8.56e-04, 0.01]                                                                                                      | beta = 0.43, 95% CI [0.14, 0.73], t(5019) = 2.86, p < .01; Std. beta = 0.27, 95% CI [0.08, 0.45]         | F(1) = 2.11, p = 0.146; Eta2 (partial) = 1.23e-03, 90% CI [0.00, 5.56e-03]                                                                                                           | beta = 0.22, 95% CI [-0.08, 0.52], t(5010) = 1.45, p = 0.146; Std. beta = 0.14, 95% CI [-0.05, 0.32]    | F(1) = 1.75, p = 0.187; Eta2 (partial) = 1.08e-03, 90% CI [0.00, 5.41e-03]                                                                                                           | beta = 0.21, 95% CI [-0.10, 0.52], t(4851) = 1.32, p = 0.186; Std. beta = 0.13, 95% CI [-0.06, 0.32]    | F(1) = 4.10, p = 0.043; Eta2 (partial) = 2.55e-03, 90% CI [4.19e-05, 8.32e-03]                                                                                                       | beta = 0.36, 95% CI [0.01, 0.70], t(4800) = 2.03, p < .05; Std. beta = 0.22, 95% CI [7.10e-03, 0.43]    | F(1) = 1.74, p = 0.187; Eta2 (partial) = 1.08e-03, 90% CI [0.00, 5.42e-03]                                                                                                           | beta = 0.21, 95% CI [-0.10, 0.52], t(4841) = 1.32, p = 0.187; Std. beta = 0.13, 95% CI [-0.06, 0.32]    |
| Anger – misclassifications (happy)   | Statin vs neither | F(1) = 0.53, p = 0.466; Eta2 (partial) = 3.19e-04, 90% CI [0.00, 3.35e-03]                                                                                                      | beta = -0.03, 95% CI [-0.11, 0.05], t(5019) = -0.73, p = 0.466; Std. beta = -0.06, 95% CI [-0.21, 0.10]  | F(1) = 0.36, p = 0.547; Eta2 (partial) = 2.19e-04, 90% CI [0.00, 2.98e-03]                                                                                                           | beta = -0.02, 95% CI [-0.10, 0.06], t(5010) = -0.60, p = 0.547; Std. beta = -0.05, 95% CI [-0.21, 0.11] | F(1) = 0.49, p = 0.486; Eta2 (partial) = 3.05e-04, 90% CI [0.00, 3.39e-03]                                                                                                           | beta = -0.03, 95% CI [-0.11, 0.05], t(4851) = -0.70, p = 0.486; Std. beta = -0.06, 95% CI [-0.22, 0.10] | F(1) = 0.43, p = 0.511; Eta2 (partial) = 2.73e-04, 90% CI [0.00, 3.28e-03]                                                                                                           | beta = -0.03, 95% CI [-0.12, 0.06], t(4800) = -0.66, p = 0.511; Std. beta = -0.06, 95% CI [-0.24, 0.12] | F(1) = 0.48, p = 0.487; Eta2 (partial) = 3.04e-04, 90% CI [0.00, 3.39e-03]                                                                                                           | beta = -0.03, 95% CI [-0.11, 0.05], t(4841) = -0.70, p = 0.487; Std. beta = -0.06, 95% CI [-0.22, 0.10] |

| Outcome                               | Groups            | Full dataset (n=2033)                                                                                                                                                                |                                                                                                        |                                                                                                                                                                                       |                                                                                                              |                                                                                                                                                                                       |                                                                                                             | Sensitivity Checks                                                                                                                                                                    |                                                                                                             |                                                                                                                                                                                       |                                                                                                             |
|---------------------------------------|-------------------|--------------------------------------------------------------------------------------------------------------------------------------------------------------------------------------|--------------------------------------------------------------------------------------------------------|---------------------------------------------------------------------------------------------------------------------------------------------------------------------------------------|--------------------------------------------------------------------------------------------------------------|---------------------------------------------------------------------------------------------------------------------------------------------------------------------------------------|-------------------------------------------------------------------------------------------------------------|---------------------------------------------------------------------------------------------------------------------------------------------------------------------------------------|-------------------------------------------------------------------------------------------------------------|---------------------------------------------------------------------------------------------------------------------------------------------------------------------------------------|-------------------------------------------------------------------------------------------------------------|
|                                       |                   | Uncorrected                                                                                                                                                                          |                                                                                                        | Corrected for demographics                                                                                                                                                            |                                                                                                              | Corrected for all covariates                                                                                                                                                          |                                                                                                             | Excluding non-lipophilic (n=2011)                                                                                                                                                     |                                                                                                             | Excluding small gender groups (n=2027)                                                                                                                                                |                                                                                                             |
|                                       |                   | ANCOVA                                                                                                                                                                               | Linear regression                                                                                      | ANCOVA                                                                                                                                                                                | Linear regression                                                                                            | ANCOVA                                                                                                                                                                                | Linear regression                                                                                           | Corrected for all covariates                                                                                                                                                          |                                                                                                             |                                                                                                                                                                                       |                                                                                                             |
|                                       |                   |                                                                                                                                                                                      |                                                                                                        |                                                                                                                                                                                       |                                                                                                              |                                                                                                                                                                                       |                                                                                                             | ANCOVA                                                                                                                                                                                | Linear regression                                                                                           | ANCOVA                                                                                                                                                                                | Linear regression                                                                                           |
| Anger – misclassifications (sad)      | Statin vs neither | (F(1) = 3.09, p = 0.079; Eta2 (partial) = 1.77e-03, 90% CI [0.00, 6.59e-03])                                                                                                         | beta = 0.52, 95% CI [-0.06, 1.11], t(5019) = 1.76, p = 0.079; Std. beta = 0.17, 95% CI [-0.02, 0.35]   | (F(1) = 0.21, p = 0.646; Eta2 (partial) = 1.21e-04, 90% CI [0.00, 2.41e-03])                                                                                                          | beta = 0.14, 95% CI [-0.46, 0.74], t(5010) = 0.46, p = 0.646; Std. beta = 0.04, 95% CI [-0.15, 0.24]         | F(1) = 4.44e-03, p = 0.947; Eta2 (partial) = 2.71e-06, 90% CI [0.00, 7.07e-05]                                                                                                        | beta = -0.02, 95% CI [-0.63, 0.59], t(4851) = -0.07, p = 0.947; Std. beta = -6.64e-03, 95% CI [-0.20, 0.19] | F(1) = 0.02, p = 0.891; Eta2 (partial) = 1.16e-05, 90% CI [0.00, 9.65e-04]                                                                                                            | beta = -0.05, 95% CI [-0.73, 0.63], t(4800) = -0.14, p = 0.891; Std. beta = -0.02, 95% CI [-0.23, 0.20]     | F(1) = 4.56e-03, p = 0.946; Eta2 (partial) = 2.78e-06, 90% CI [0.00, 8.99e-05]                                                                                                        | beta = -0.02, 95% CI [-0.64, 0.59], t(4841) = -0.07, p = 0.946; Std. beta = -6.73e-03, 95% CI [-0.20, 0.19] |
| Anger – misclassifications (surprise) | Statin vs neither | (F(1) = 7.51, p = 0.006; Eta2 (partial) = 4.28e-03, 90% CI [6.83e-04, 0.01])                                                                                                         | beta = 0.12, 95% CI [0.04, 0.21], t(5019) = 2.74, p < .01; Std. beta = 0.22, 95% CI [0.06, 0.38]       | (F(1) = 10.85, p = 0.001; Eta2 (partial) = 6.22e-03, 90% CI [1.56e-03, 0.01])                                                                                                         | beta = 0.15, 95% CI [0.06, 0.24], t(5010) = 3.29, p < .001; Std. beta = 0.27, 95% CI [0.11, 0.43]            | F(1) = 11.52, p < .001; Eta2 (partial) = 7.00e-03, 90% CI [1.86e-03, 0.02]                                                                                                            | beta = 0.16, 95% CI [0.07, 0.26], t(4851) = 3.39, p < .001; Std. beta = 0.29, 95% CI [0.12, 0.46]           | F(1) = 6.87, p = 0.009; Eta2 (partial) = 4.21e-03, 90% CI [5.82e-04, 0.01])                                                                                                           | beta = 0.14, 95% CI [0.03, 0.24], t(4800) = 2.62, p < .01; Std. beta = 0.25, 95% CI [0.06, 0.43]            | F(1) = 11.52, p < .001; Eta2 (partial) = 7.01e-03, 90% CI [1.86e-03, 0.02]                                                                                                            | beta = 0.16, 95% CI [0.07, 0.26], t(4841) = 3.39, p < .001; Std. beta = 0.29, 95% CI [0.12, 0.46]           |
| Anger – misclassifications (neutral)  | Statin vs neither | (F(1) = 2.28, p = 0.131; Eta2 (partial) = 1.28e-03, 90% CI [0.00, 5.58e-03])                                                                                                         | beta = 0.54, 95% CI [-0.16, 1.25], t(5019) = 1.51, p = 0.131; Std. beta = 0.14, 95% CI [-0.04, 0.33]   | (F(1) = 3.40, p = 0.065; Eta2 (partial) = 1.92e-03, 90% CI [0.00, 6.86e-03])                                                                                                          | beta = 0.68, 95% CI [-0.04, 1.40], t(5010) = 1.84, p = 0.065; Std. beta = 0.18, 95% CI [-0.01, 0.37]         | F(1) = 3.17, p = 0.075; Eta2 (partial) = 1.91e-03, 90% CI [0.00, 7.05e-03]                                                                                                            | beta = 0.68, 95% CI [-0.07, 1.42], t(4851) = 1.78, p = 0.075; Std. beta = 0.18, 95% CI [-0.02, 0.37]        | F(1) = 2.31, p = 0.129; Eta2 (partial) = 1.41e-03, 90% CI [0.00, 6.07e-03]                                                                                                            | beta = 0.64, 95% CI [-0.18, 1.46], t(4800) = 1.52, p = 0.128; Std. beta = 0.17, 95% CI [-0.05, 0.39]        | F(1) = 3.16, p = 0.076; Eta2 (partial) = 1.91e-03, 90% CI [0.00, 7.05e-03]                                                                                                            | beta = 0.68, 95% CI [-0.07, 1.42], t(4841) = 1.78, p = 0.075; Std. beta = 0.18, 95% CI [-0.02, 0.37]        |
| Fear – misclassifications (all)       | All               | Group: F(3) = 5.99, p < .001; Eta2 (partial) = 8.95e-03, 90% CI [2.58e-03, 0.02]<br><br>Interaction: F(15) = 3.49, p < .001; Eta2 (partial) = 1.62e-03, 90% CI [5.90e-04, 1.96e-03]) | N/A                                                                                                    | Group: F(3) = 3.28, p = 0.020; Eta2 (partial) = 4.95e-03, 90% CI [4.18e-04, 0.01]<br><br>Interaction: F(15) = 3.49, p < .001; Eta2 (partial) = 1.62e-03, 90% CI [5.90e-04, 1.96e-03]) | N/A                                                                                                          | Group: F(3) = 2.37, p = 0.069; Eta2 (partial) = 3.80e-03, 90% CI [0.00, 8.52e-03]<br><br>Interaction: F(15) = 3.47, p < .001; Eta2 (partial) = 1.66e-03, 90% CI [5.99e-04, 2.01e-03]) | N/A                                                                                                         | Group: F(3) = 1.65, p = 0.175; Eta2 (partial) = 2.68e-03, 90% CI [0.00, 6.63e-03]<br><br>Interaction: F(15) = 3.06, p < .001; Eta2 (partial) = 1.48e-03, 90% CI [4.58e-04, 1.78e-03]) | N/A                                                                                                         | Group: F(3) = 2.38, p = 0.068; Eta2 (partial) = 3.81e-03, 90% CI [0.00, 8.55e-03]<br><br>Interaction: F(15) = 3.43, p < .001; Eta2 (partial) = 1.65e-03, 90% CI [5.88e-04, 1.99e-03]) | N/A                                                                                                         |
| Fear – misclassifications (anger)     | Statin vs neither | F(1) = 4.33, p = 0.038; Eta2 (partial) = 2.43e-03, 90% CI [7.24e-05, 7.75e-03]                                                                                                       | (beta = 0.27, 95% CI [0.02, 0.53], t(5019) = 2.08, p < .05; Std. beta = 0.16, 95% CI [9.05e-03, 0.30]) | F(1) = 3.46e-03, p = 0.953; Eta2 (partial) = 1.96e-06, 90% CI [0.00, 0.00]                                                                                                            | beta = 7.74e-03, 95% CI [-0.25, 0.27], t(5010) = 0.06, p = 0.953; Std. beta = 4.44e-03, 95% CI [-0.14, 0.15] | F(1) = 0.13, p = 0.721; Eta2 (partial) = 7.71e-05, 90% CI [0.00, 2.16e-03]                                                                                                            | beta = -0.05, 95% CI [-0.31, 0.22], t(4851) = -0.36, p = 0.721; Std. beta = -0.03, 95% CI [-0.18, 0.12]     | F(1) = 8.06e-03, p = 0.928; Eta2 (partial) = 4.89e-06, 90% CI [0.00, 4.36e-04]                                                                                                        | beta = -0.01, 95% CI [-0.31, 0.28], t(4800) = -0.09, p = 0.928; Std. beta = -7.74e-03, 95% CI [-0.18, 0.16] | F(1) = 0.13, p = 0.724; Eta2 (partial) = 7.58e-05, 90% CI [0.00, 2.30e-03]                                                                                                            | beta = -0.05, 95% CI [-0.31, 0.22], t(4841) = -0.35, p = 0.723; Std. beta = -0.03, 95% CI [-0.18, 0.12]     |
| Fear – misclassifications (disgust)   | Statin vs neither | F(1) = 2.11, p = 0.146; Eta2 (partial) = 1.25e-03, 90% CI [0.00, 5.67e-03]                                                                                                           | beta = 0.32, 95% CI [-0.11, 0.75], t(5019) = 1.45, p = 0.146; Std. beta = 0.12, 95% CI [-0.04, 0.28]   | F(1) = 4.21, p = 0.040; Eta2 (partial) = 2.51e-03, 90% CI [5.77e-05, 8.10e-03]                                                                                                        | beta = 0.46, 95% CI [0.02, 0.90], t(5010) = 2.05, p < .05; Std. beta = 0.17, 95% CI [7.82e-03, 0.34]         | F(1) = 3.12, p = 0.077; Eta2 (partial) = 1.91e-03, 90% CI [0.00, 7.10e-03]                                                                                                            | beta = 0.40, 95% CI [-0.04, 0.85], t(4851) = 1.77, p = 0.077; Std. beta = 0.15, 95% CI [-0.02, 0.32]        | F(1) = 1.72, p = 0.190; Eta2 (partial) = 1.06e-03, 90% CI [0.00, 5.37e-03]                                                                                                            | beta = 0.33, 95% CI [-0.16, 0.82], t(4800) = 1.31, p = 0.189; Std. beta = 0.12, 95% CI [-0.06, 0.31]        | F(1) = 3.13, p = 0.077; Eta2 (partial) = 1.92e-03, 90% CI [0.00, 7.12e-03]                                                                                                            | beta = 0.40, 95% CI [-0.04, 0.85], t(4841) = 1.77, p = 0.077; Std. beta = 0.15, 95% CI [-0.02, 0.32]        |

| Outcome                              | Groups            | Full dataset (n=2033)                                                                                                                                                        |                                                                                                      |                                                                                                                                                                                      |                                                                                                                  |                                                                                                                                                                                      |                                                                                                         | Sensitivity Checks                                                                                                                                                                   |                                                                                                         |                                                                                                                                                                                      |                                                                                                         |
|--------------------------------------|-------------------|------------------------------------------------------------------------------------------------------------------------------------------------------------------------------|------------------------------------------------------------------------------------------------------|--------------------------------------------------------------------------------------------------------------------------------------------------------------------------------------|------------------------------------------------------------------------------------------------------------------|--------------------------------------------------------------------------------------------------------------------------------------------------------------------------------------|---------------------------------------------------------------------------------------------------------|--------------------------------------------------------------------------------------------------------------------------------------------------------------------------------------|---------------------------------------------------------------------------------------------------------|--------------------------------------------------------------------------------------------------------------------------------------------------------------------------------------|---------------------------------------------------------------------------------------------------------|
|                                      |                   | Uncorrected                                                                                                                                                                  |                                                                                                      | Corrected for demographics                                                                                                                                                           |                                                                                                                  | Corrected for all covariates                                                                                                                                                         |                                                                                                         | Excluding non-lipophilic (n=2011)                                                                                                                                                    |                                                                                                         | Excluding small gender groups (n=2027)                                                                                                                                               |                                                                                                         |
|                                      |                   | ANCOVA                                                                                                                                                                       | Linear regression                                                                                    | ANCOVA                                                                                                                                                                               | Linear regression                                                                                                | ANCOVA                                                                                                                                                                               | Linear regression                                                                                       | Corrected for all covariates                                                                                                                                                         |                                                                                                         |                                                                                                                                                                                      |                                                                                                         |
|                                      |                   |                                                                                                                                                                              |                                                                                                      |                                                                                                                                                                                      |                                                                                                                  |                                                                                                                                                                                      |                                                                                                         | ANCOVA                                                                                                                                                                               | Linear regression                                                                                       | ANCOVA                                                                                                                                                                               | Linear regression                                                                                       |
| Fear – misclassifications (happy)    | Statin vs neither | F(1) = 0.24, p = 0.626; Eta2 (partial) = 1.40e-04, 90% CI [0.00, 2.54e-03]                                                                                                   | beta = 0.04, 95% CI [-0.11, 0.18], t(5019) = 0.49, p = 0.626; Std. beta = 0.04, 95% CI [-0.12, 0.20] | F(1) = 2.10e-05, p = 0.996; Eta2 (partial) = 1.24e-08, 90% CI [0.00, 0.00]                                                                                                           | beta = 3.51e-04, 95% CI [-0.15, 0.15], t(5010) = 4.58e-03, p = 0.996; Std. beta = 3.86e-04, 95% CI [-0.16, 0.17] | F(1) = 0.03, p = 0.866; Eta2 (partial) = 1.79e-05, 90% CI [0.00, 1.24e-03]                                                                                                           | beta = -0.01, 95% CI [-0.17, 0.14], t(4851) = -0.17, p = 0.866; Std. beta = -0.01, 95% CI [-0.18, 0.15] | F(1) = 0.38, p = 0.540; Eta2 (partial) = 2.36e-04, 90% CI [0.00, 3.13e-03]                                                                                                           | beta = -0.05, 95% CI [-0.22, 0.12], t(4800) = -0.61, p = 0.540; Std. beta = -0.06, 95% CI [-0.25, 0.13] | F(1) = 0.03, p = 0.866; Eta2 (partial) = 1.77e-05, 90% CI [0.00, 1.28e-03]                                                                                                           | beta = -0.01, 95% CI [-0.17, 0.14], t(4841) = -0.17, p = 0.866; Std. beta = -0.01, 95% CI [-0.18, 0.15] |
| Fear – misclassifications (sad)      | Statin vs neither | (F(1) = 0.74, p = 0.390; Eta2 (partial) = 4.23e-04, 90% CI [0.00, 3.57e-03]                                                                                                  | beta = 0.21, 95% CI [-0.27, 0.70], t(5019) = 0.86, p = 0.390; Std. beta = 0.08, 95% CI [-0.10, 0.26] | F(1) = 0.40, p = 0.527; Eta2 (partial) = 2.31e-04, 90% CI [0.00, 2.94e-03]                                                                                                           | beta = -0.16, 95% CI [-0.66, 0.34], t(5010) = -0.63, p = 0.527; Std. beta = -0.06, 95% CI [-0.24, 0.12]          | F(1) = 2.01, p = 0.157; Eta2 (partial) = 1.22e-03, 90% CI [0.00, 5.65e-03]                                                                                                           | beta = -0.37, 95% CI [-0.87, 0.14], t(4851) = -1.42, p = 0.156; Std. beta = -0.13, 95% CI [-0.32, 0.05] | F(1) = 0.74, p = 0.390; Eta2 (partial) = 4.51e-04, 90% CI [0.00, 3.80e-03]                                                                                                           | beta = -0.25, 95% CI [-0.81, 0.32], t(4800) = -0.86, p = 0.390; Std. beta = -0.09, 95% CI [-0.30, 0.12] | F(1) = 2.00, p = 0.157; Eta2 (partial) = 1.21e-03, 90% CI [0.00, 5.65e-03]                                                                                                           | beta = -0.37, 95% CI [-0.87, 0.14], t(4841) = -1.42, p = 0.157; Std. beta = -0.13, 95% CI [-0.32, 0.05] |
| Fear – misclassifications (surprise) | Statin vs neither | F(1) = 0.44, p = 0.505; Eta2 (partial) = 2.52e-04, 90% CI [0.00, 2.99e-03]                                                                                                   | beta = 0.28, 95% CI [-0.54, 1.09], t(5019) = 0.67, p = 0.505; Std. beta = 0.06, 95% CI [-0.12, 0.25] | F(1) = 4.45, p = 0.035; Eta2 (partial) = 2.54e-03, 90% CI [9.21e-05, 7.99e-03]                                                                                                       | beta = 0.89, 95% CI [0.06, 1.72], t(5010) = 2.11, p < .05; Std. beta = 0.21, 95% CI [0.01, 0.40]                 | F(1) = 4.36, p = 0.037; Eta2 (partial) = 2.63e-03, 90% CI [8.27e-05, 8.36e-03]                                                                                                       | beta = 0.91, 95% CI [0.06, 1.76], t(4851) = 2.09, p < .05; Std. beta = 0.21, 95% CI [0.01, 0.41]        | F(1) = 2.81, p = 0.094; Eta2 (partial) = 1.71e-03, 90% CI [0.00, 6.67e-03]                                                                                                           | beta = 0.81, 95% CI [-0.14, 1.75], t(4800) = 1.68, p = 0.094; Std. beta = 0.19, 95% CI [-0.03, 0.40]    | F(1) = 4.39, p = 0.036; Eta2 (partial) = 2.65e-03, 90% CI [8.68e-05, 8.39e-03]                                                                                                       | beta = 0.91, 95% CI [0.06, 1.76], t(4841) = 2.09, p < .05; Std. beta = 0.21, 95% CI [0.01, 0.41]        |
| Fear – misclassifications (neutral)  | Statin vs neither | F(1) = 7.93, p = 0.005; Eta2 (partial) = 4.48e-03, 90% CI [7.73e-04, 0.01]                                                                                                   | beta = 0.95, 95% CI [0.29, 1.62], t(5019) = 2.82, p < .01; Std. beta = 0.27, 95% CI [0.08, 0.45]     | (F(1) = 2.58, p = 0.109; Eta2 (partial) = 1.47e-03, 90% CI [0.00, 5.99e-03]                                                                                                          | beta = 0.56, 95% CI [-0.12, 1.24], t(5010) = 1.61, p = 0.108; Std. beta = 0.16, 95% CI [-0.03, 0.35]             | F(1) = 2.49, p = 0.115; Eta2 (partial) = 1.51e-03, 90% CI [0.00, 6.26e-03]                                                                                                           | beta = 0.57, 95% CI [-0.14, 1.27], t(4851) = 1.58, p = 0.115; Std. beta = 0.16, 95% CI [-0.04, 0.35]    | F(1) = 0.86, p = 0.355; Eta2 (partial) = 5.23e-04, 90% CI [0.00, 4.01e-03]                                                                                                           | beta = 0.37, 95% CI [-0.41, 1.14], t(4800) = 0.93, p = 0.355; Std. beta = 0.10, 95% CI [-0.11, 0.32]    | F(1) = 2.47, p = 0.116; Eta2 (partial) = 1.50e-03, 90% CI [0.00, 6.25e-03]                                                                                                           | beta = 0.56, 95% CI [-0.14, 1.27], t(4841) = 1.57, p = 0.116; Std. beta = 0.16, 95% CI [-0.04, 0.35]    |
| All emotions - RT                    | All               | Group: F(3) = 14.57, p < .001; Eta2 (partial) = 0.02, 90% CI [0.01, 0.03]<br><br>Interaction: F(18) = 5.03, p < .001; Eta2 (partial) = 2.39e-03, 90% CI [1.23e-03, 2.80e-03] | N/A                                                                                                  | Group: F(3) = 1.13, p = 0.335; Eta2 (partial) = 1.69e-03, 90% CI [0.00, 4.63e-03]<br><br>Interaction: F(18) = 5.03, p < .001; Eta2 (partial) = 2.39e-03, 90% CI [1.23e-03, 2.80e-03] | N/A                                                                                                              | Group: F(3) = 1.49, p = 0.216; Eta2 (partial) = 2.37e-03, 90% CI [0.00, 6.03e-03]<br><br>Interaction: F(18) = 5.01, p < .001; Eta2 (partial) = 2.45e-03, 90% CI [1.25e-03, 2.87e-03] | N/A                                                                                                     | Group: F(3) = 0.83, p = 0.480; Eta2 (partial) = 1.33e-03, 90% CI [0.00, 3.96e-03]<br><br>Interaction: F(18) = 4.91, p < .001; Eta2 (partial) = 2.43e-03, 90% CI [1.23e-03, 2.84e-03] | N/A                                                                                                     | Group: F(3) = 1.49, p = 0.216; Eta2 (partial) = 2.37e-03, 90% CI [0.00, 6.04e-03]<br><br>Interaction: F(18) = 4.94, p < .001; Eta2 (partial) = 2.42e-03, 90% CI [1.23e-03, 2.84e-03] | N/A                                                                                                     |
| Anger - RT                           | Statin vs neither | F(1) = 33.47, p < .001; Eta2 (partial) = 0.02, 90% CI [9.56e-03, 0.03]                                                                                                       | beta = 254.41, 95% CI [168.22, 340.60], t(5017) = 5.79, p < .001; Std. beta = 0.59,                  | F(1) = 7.05, p = 0.008; Eta2 (partial) = 3.99e-03, 90% CI [5.76e-04, 0.01]                                                                                                           | beta = 114.46, 95% CI [29.95, 198.97], t(5008) = 2.65, p < .01; Std. beta = 0.26,                                | F(1) = 7.93, p = 0.005; Eta2 (partial) = 4.78e-03, 90% CI [8.27e-04, 0.01]                                                                                                           | beta = 124.47, 95% CI [37.86, 211.08], t(4849) = 2.82, p < .01; Std. beta = 0.29,                       | F(1) = 5.43, p = 0.020; Eta2 (partial) = 3.30e-03, 90% CI [2.75e-04, 9.56e-03]                                                                                                       | beta = 114.03, 95% CI [18.16, 209.90], t(4798) = 2.33, p < .05; Std. beta = 0.26,                       | F(1) = 7.93, p = 0.005; Eta2 (partial) = 4.78e-03, 90% CI [8.26e-04, 0.01]                                                                                                           | beta = 124.48, 95% CI [37.82, 211.14], t(4839) = 2.82, p < .01; Std. beta = 0.29,                       |



| Outcome        | Groups            | Full dataset (n=2033)                                                      |                                                                                                           |                                                                            |                                                                                                          |                                                                                |                                                                                                          | Sensitivity Checks                                                         |                                                                                                          |                                                                                |                                                                                                          |
|----------------|-------------------|----------------------------------------------------------------------------|-----------------------------------------------------------------------------------------------------------|----------------------------------------------------------------------------|----------------------------------------------------------------------------------------------------------|--------------------------------------------------------------------------------|----------------------------------------------------------------------------------------------------------|----------------------------------------------------------------------------|----------------------------------------------------------------------------------------------------------|--------------------------------------------------------------------------------|----------------------------------------------------------------------------------------------------------|
|                |                   | Uncorrected                                                                |                                                                                                           | Corrected for demographics                                                 |                                                                                                          | Corrected for all covariates                                                   |                                                                                                          | Excluding non-lipophilic (n=2011)                                          |                                                                                                          | Excluding small gender groups (n=2027)                                         |                                                                                                          |
|                |                   | ANCOVA                                                                     | Linear regression                                                                                         | ANCOVA                                                                     | Linear regression                                                                                        | ANCOVA                                                                         | Linear regression                                                                                        | Corrected for all covariates                                               |                                                                                                          |                                                                                |                                                                                                          |
|                |                   |                                                                            |                                                                                                           |                                                                            |                                                                                                          |                                                                                |                                                                                                          | ANCOVA                                                                     | Linear regression                                                                                        | ANCOVA                                                                         | Linear regression                                                                                        |
|                |                   |                                                                            | 95% CI [0.39, 0.78]                                                                                       |                                                                            | 95% CI [0.07, 0.46]                                                                                      |                                                                                | 95% CI [0.09, 0.49]                                                                                      |                                                                            | 95% CI [0.04, 0.49]                                                                                      |                                                                                | 95% CI [0.09, 0.49]                                                                                      |
| Disgust - RT   | Statin vs neither | F(1) = 21.99, p < .001; Eta2 (partial) = 0.01, 90% CI [5.18e-03, 0.02]     | (beta = 194.66, 95% CI [113.29, 276.03], t(5017) = 4.69, p < .001; Std. beta = 0.47, 95% CI [0.27, 0.66]) | F(1) = 3.37, p = 0.067; Eta2 (partial) = 1.91e-03, 90% CI [0.00, 6.83e-03] | beta = 75.43, 95% CI [-5.11, 155.98], t(5008) = 1.84, p = 0.066; Std. beta = 0.18, 95% CI [-0.01, 0.38]  | F(1) = 3.88, p = 0.049; Eta2 (partial) = 2.34e-03, 90% CI [4.51e-06, 7.84e-03] | beta = 83.36, 95% CI [0.37, 166.35], t(4849) = 1.97, p < .05; Std. beta = 0.20, 95% CI [8.88e-04, 0.40]  | F(1) = 1.81, p = 0.178; Eta2 (partial) = 1.10e-03, 90% CI [0.00, 5.42e-03] | beta = 63.16, 95% CI [-28.74, 155.06], t(4798) = 1.35, p = 0.178; Std. beta = 0.15, 95% CI [-0.07, 0.37] | F(1) = 3.87, p = 0.049; Eta2 (partial) = 2.34e-03, 90% CI [4.28e-06, 7.84e-03] | beta = 83.39, 95% CI [0.35, 166.43], t(4839) = 1.97, p < .05; Std. beta = 0.20, 95% CI [8.51e-04, 0.40]  |
| Fear - RT      | Statin vs neither | F(1) = 15.64, p < .001; Eta2 (partial) = 8.63e-03, 90% CI [2.95e-03, 0.02] | beta = 194.48, 95% CI [98.09, 290.87], t(4979) = 3.95, p < .001; Std. beta = 0.38, 95% CI [0.19, 0.56])   | F(1) = 1.79, p = 0.181; Eta2 (partial) = 1.01e-03, 90% CI [0.00, 4.98e-03] | beta = 65.62, 95% CI [-30.45, 161.70], t(4970) = 1.34, p = 0.181; Std. beta = 0.13, 95% CI [-0.06, 0.31] | F(1) = 1.19, p = 0.276; Eta2 (partial) = 7.09e-04, 90% CI [0.00, 4.45e-03]     | beta = 54.99, 95% CI [-43.93, 153.92], t(4813) = 1.09, p = 0.276; Std. beta = 0.11, 95% CI [-0.08, 0.30] | F(1) = 0.56, p = 0.453; Eta2 (partial) = 3.40e-04, 90% CI [0.00, 2.52e-03] | beta = 42.06, 95% CI [-67.70, 151.83], t(4764) = 0.75, p = 0.453; Std. beta = 0.08, 95% CI [-0.13, 0.29] | F(1) = 1.19, p = 0.275; Eta2 (partial) = 7.13e-04, 90% CI [0.00, 4.46e-03]     | beta = 55.13, 95% CI [-43.83, 154.09], t(4803) = 1.09, p = 0.275; Std. beta = 0.11, 95% CI [-0.08, 0.30] |
| Happiness - RT | Statin vs neither | F(1) = 13.97, p < .001; Eta2 (partial) = 7.82e-03, 90% CI [2.45e-03, 0.02] | beta = 114.22, 95% CI [54.32, 174.13], t(5019) = 3.74, p < .001; Std. beta = 0.38, 95% CI [0.18, 0.58])   | F(1) = 2.48, p = 0.116; Eta2 (partial) = 1.41e-03, 90% CI [0.00, 5.85e-03] | beta = 48.04, 95% CI [-11.76, 107.84], t(5010) = 1.57, p = 0.115; Std. beta = 0.16, 95% CI [-0.04, 0.36] | F(1) = 2.81, p = 0.094; Eta2 (partial) = 1.70e-03, 90% CI [0.00, 6.64e-03]     | beta = 52.90, 95% CI [-8.99, 114.79], t(4851) = 1.68, p = 0.094; Std. beta = 0.18, 95% CI [-0.03, 0.38]  | F(1) = 1.00, p = 0.317; Eta2 (partial) = 6.11e-04, 90% CI [0.00, 4.25e-03] | beta = 34.85, 95% CI [-33.42, 103.11], t(4800) = 1.00, p = 0.317; Std. beta = 0.12, 95% CI [-0.11, 0.35] | F(1) = 2.81, p = 0.094; Eta2 (partial) = 1.70e-03, 90% CI [0.00, 6.65e-03]     | beta = 52.94, 95% CI [-8.99, 114.86], t(4841) = 1.68, p = 0.094; Std. beta = 0.18, 95% CI [-0.03, 0.38]  |
| Sadness - RT   | Statin vs neither | F(1) = 12.66, p < .001; Eta2 (partial) = 7.10e-03, 90% CI [2.06e-03, 0.02] | beta = 130.14, 95% CI [58.45, 201.84], t(5018) = 3.56, p < .001; Std. beta = 0.35, 95% CI [0.16, 0.54])   | F(1) = 1.26, p = 0.261; Eta2 (partial) = 7.18e-04, 90% CI [0.00, 4.34e-03] | beta = 40.86, 95% CI [-30.41, 112.14], t(5009) = 1.12, p = 0.261; Std. beta = 0.11, 95% CI [-0.08, 0.30] | F(1) = 2.17, p = 0.141; Eta2 (partial) = 1.31e-03, 90% CI [0.00, 5.86e-03]     | beta = 55.25, 95% CI [-18.20, 128.69], t(4850) = 1.47, p = 0.140; Std. beta = 0.15, 95% CI [-0.05, 0.34] | F(1) = 0.99, p = 0.320; Eta2 (partial) = 6.02e-04, 90% CI [0.00, 4.23e-03] | beta = 41.07, 95% CI [-39.93, 122.07], t(4799) = 0.99, p = 0.320; Std. beta = 0.11, 95% CI [-0.11, 0.33] | F(1) = 2.17, p = 0.141; Eta2 (partial) = 1.32e-03, 90% CI [0.00, 5.86e-03]     | beta = 55.27, 95% CI [-18.22, 128.75], t(4840) = 1.47, p = 0.140; Std. beta = 0.15, 95% CI [-0.05, 0.34] |
| Surprise - RT  | Statin vs neither | F(1) = 12.00, p < .001; Eta2 (partial) = 6.73e-03, 90% CI [1.86e-03, 0.01] | beta = 133.22, 95% CI [57.85, 208.59], t(5019) = 3.46, p < .001; Std. beta = 0.35, 95% CI [0.15, 0.55])   | F(1) = 0.47, p = 0.492; Eta2 (partial) = 2.68e-04, 90% CI [0.00, 6.02e-04] | beta = 26.17, 95% CI [-48.46, 100.81], t(5010) = 0.69, p = 0.492; Std. beta = 0.07, 95% CI [-0.13, 0.27] | F(1) = 1.08, p = 0.299; Eta2 (partial) = 6.52e-04, 90% CI [0.00, 4.33e-03]     | beta = 40.64, 95% CI [-36.01, 117.28], t(4851) = 1.04, p = 0.299; Std. beta = 0.11, 95% CI [-0.10, 0.31] | F(1) = 0.35, p = 0.555; Eta2 (partial) = 2.12e-04, 90% CI [0.00, 2.97e-03] | beta = 25.53, 95% CI [-59.25, 110.31], t(4800) = 0.59, p = 0.555; Std. beta = 0.07, 95% CI [-0.16, 0.29] | F(1) = 1.08, p = 0.299; Eta2 (partial) = 6.52e-04, 90% CI [0.00, 4.33e-03]     | beta = 40.61, 95% CI [-36.07, 117.30], t(4841) = 1.04, p = 0.299; Std. beta = 0.11, 95% CI [-0.10, 0.31] |
| Neutral - RT   | Statin vs neither | F(1) = 11.24, p < .001; Eta2 (partial) = 6.36e-03, 90% CI [1.65e-03, 0.01] | (beta = 116.29, 95% CI [48.30, 184.28], t(5015) = 3.35, p < .001; Std. beta = 0.32, 95% CI [0.13, 0.51])  | F(1) = 1.88, p = 0.170; Eta2 (partial) = 1.08e-03, 90% CI [0.00, 5.21e-03] | beta = 47.56, 95% CI [-20.35, 115.47], t(5006) = 1.37, p = 0.170; Std. beta = 0.13, 95% CI [-0.06, 0.32] | F(1) = 1.22, p = 0.269; Eta2 (partial) = 7.45e-04, 90% CI [0.00, 4.62e-03]     | beta = 39.30, 95% CI [-30.39, 108.99], t(4848) = 1.11, p = 0.269; Std. beta = 0.11, 95% CI [-0.08, 0.30] | F(1) = 0.58, p = 0.447; Eta2 (partial) = 3.56e-04, 90% CI [0.00, 3.52e-03] | beta = 29.89, 95% CI [-47.10, 106.88], t(4797) = 0.76, p = 0.447; Std. beta = 0.08, 95% CI [-0.13, 0.30] | F(1) = 1.22, p = 0.270; Eta2 (partial) = 7.45e-04, 90% CI [0.00, 4.60e-03]     | beta = 39.29, 95% CI [-30.44, 109.03], t(4838) = 1.10, p = 0.269; Std. beta = 0.11, 95% CI [-0.09, 0.30] |

| Outcome                                       | Groups                                                                 | Full dataset (n=1636)                                                                 |                                                                                                         |                                                                                        |                                                                                                         |                                                                                        |                                                                                                         | Sensitivity Checks                                                                     |                                                                                                         |                                                                                        |                                                                                                         |                                                                                        |                                                                                                         |                                                                                              |                                                                                                         |
|-----------------------------------------------|------------------------------------------------------------------------|---------------------------------------------------------------------------------------|---------------------------------------------------------------------------------------------------------|----------------------------------------------------------------------------------------|---------------------------------------------------------------------------------------------------------|----------------------------------------------------------------------------------------|---------------------------------------------------------------------------------------------------------|----------------------------------------------------------------------------------------|---------------------------------------------------------------------------------------------------------|----------------------------------------------------------------------------------------|---------------------------------------------------------------------------------------------------------|----------------------------------------------------------------------------------------|---------------------------------------------------------------------------------------------------------|----------------------------------------------------------------------------------------------|---------------------------------------------------------------------------------------------------------|
|                                               |                                                                        | Last 20 trials only                                                                   |                                                                                                         |                                                                                        |                                                                                                         |                                                                                        |                                                                                                         | All trials                                                                             |                                                                                                         | Excluding non-lipophilic (n=1619)                                                      |                                                                                                         | Excluding small gender groups (n=1631)                                                 |                                                                                                         | Excluding understanding check fails (n=1271)                                                 |                                                                                                         |
|                                               |                                                                        | Uncorrected                                                                           |                                                                                                         | Corrected for demographics                                                             |                                                                                                         | Corrected for all covariates                                                           |                                                                                                         | Corrected for all covariates                                                           |                                                                                                         |                                                                                        |                                                                                                         |                                                                                        |                                                                                                         |                                                                                              |                                                                                                         |
|                                               |                                                                        | ANCOVA                                                                                | Linear regression                                                                                       | ANCOVA                                                                                 | Linear regression                                                                                       | ANCOVA                                                                                 | Linear regression                                                                                       | ANCOVA                                                                                 | Linear regression                                                                                       | ANCOVA                                                                                 | Linear model                                                                                            | ANCOVA                                                                                 | Linear model                                                                                            | ANCOVA                                                                                       | Linear model                                                                                            |
| Gain trials - choice of advantageous stimulus | All                                                                    | F(3, 1632) = 0.24, p = 0.871; Eta2 = 4.35e-04, 90% CI [0.00, 1.34e-03]                | N/A                                                                                                     | F(3, 1623) = 0.24, p = 0.870; Eta2 (partial) = 4.40e-04, 90% CI [0.00, 1.36e-03]       | N/A                                                                                                     | F(3, 1610) = 0.06, p = 0.979; Eta2 (partial) = 1.20e-04, 90% CI [0.00, 0.00]           | N/A                                                                                                     | F(3, 1610) = 0.24, p = 0.866; Eta2 (partial) = 4.53e-04, 90% CI [0.00, 1.41e-03]       | N/A                                                                                                     | F(3, 1593) = 0.18, p = 0.909; Eta2 (partial) = 3.41e-04, 90% CI [0.00, 8.33e-04]       | N/A                                                                                                     | F(3, 1607) = 0.05, p = 0.984; Eta2 (partial) = 9.97e-05, 90% CI [0.00, 0.00]           | N/A                                                                                                     | F(3, 1245) = 0.67, p = 0.572; Eta2 (partial) = 1.61e-03, 90% CI [0.00, 5.02e-03]             | N/A                                                                                                     |
|                                               | Loss trials - choice of advantageous stimulus                          | F(3, 1632) = 3.91, p = 0.009; Eta2 = 7.13e-03, 90% CI [1.04e-03, 0.01]                | N/A                                                                                                     | F(3, 1623) = 4.01, p = 0.007; Eta2 (partial) = 7.35e-03, 90% CI [1.14e-03, 0.01]       | N/A                                                                                                     | F(3, 1610) = 4.73, p = 0.003; Eta2 (partial) = 8.74e-03, 90% CI [1.85e-03, 0.02]       | N/A                                                                                                     | F(3, 1610) = 4.07, p = 0.007; Eta2 (partial) = 7.52e-03, 90% CI [1.20e-03, 0.01]       | N/A                                                                                                     | F(3, 1593) = 4.24, p = 0.005; Eta2 (partial) = 7.92e-03, 90% CI [1.38e-03, 0.02]       | N/A                                                                                                     | F(3, 1607) = 4.67, p = 0.003; Eta2 (partial) = 8.65e-03, 90% CI [1.79e-03, 0.02]       | N/A                                                                                                     | F(3, 1245) = 2.99, p = 0.030; Eta2 (partial) = 7.16e-03, 90% CI [3.65e-04, 0.02]             | N/A                                                                                                     |
|                                               | Statin vs neither                                                      | F(1, 1440) = 9.22, p = 0.002; Eta2 = 6.36e-03, 90% CI [1.34e-03, 0.02]                | beta = -5.61, 95% CI [-9.16, -2.06], t(1632) = -3.10, p < .01; Std. beta = -0.39, 95% CI [-0.63, -0.14] | F(2, 1430) = 5.05, p = 0.007; Eta2 (partial) = 7.01e-03, 90% CI [1.14e-03, 0.02]       | beta = -3.82, 95% CI [-7.43, -0.21], t(1623) = -2.08, p < .05; Std. beta = -0.26, 95% CI [-0.51, -0.01] | F(1, 1418) = 9.90, p = 0.002; Eta2 (partial) = 6.93e-03, 90% CI [1.58e-03, 0.02]       | beta = -3.73, 95% CI [-7.33, -0.12], t(1610) = -2.03, p < .05; Std. beta = -0.26, 95% CI [-0.51, -0.01] | F(1, 1418) = 9.60, p = 0.002; Eta2 (partial) = 6.72e-03, 90% CI [1.48e-03, 0.02]       | beta = -3.25, 95% CI [-6.24, -0.27], t(1610) = -2.14, p < .05; Std. beta = -0.27, 95% CI [-0.52, -0.02] | F(1, 1405) = 7.53, p = 0.006; Eta2 (partial) = 5.33e-03, 90% CI [8.55e-04, 0.01]       | beta = -3.69, 95% CI [-7.64, 0.27], t(1593) = -1.83, p = 0.068; Std. beta = -0.25, 95% CI [-0.53, 0.02] | F(1, 1415) = 9.81, p = 0.002; Eta2 (partial) = 6.89e-03, 90% CI [1.55e-03, 0.02]       | beta = -3.72, 95% CI [-7.32, -0.12], t(1607) = -2.03, p < .05; Std. beta = -0.26, 95% CI [-0.50, -0.01] | F(1, 1101) = 4.62, p = 0.032; Eta2 (partial) = 4.18e-03, 90% CI [1.89e-04, 0.01]             | beta = -2.73, 95% CI [-6.97, 1.51], t(1245) = -1.26, p = 0.207; Std. beta = -0.19, 95% CI [-0.48, 0.10] |
| BP vs neither                                 | F(1, 1476) = 2.52, p = 0.112; Eta2 = 1.71e-03, 90% CI [0.00, 7.04e-03] | beta = -3.00, 95% CI [-5.90, -0.11], t(1632) = -2.03, p < .05; Std. beta = -0.21, 95% | F(2, 1467) = 2.97, p = 0.051; Eta2 (partial) = 4.04e-03, 90% CI [0.00, 0.01]                            | beta = -1.47, 95% CI [-4.40, 1.46], t(1623) = -0.98, p = 0.326; Std. beta = -0.10, 95% | F(1, 1454) = 4.26, p = 0.039; Eta2 (partial) = 2.92e-03, 90% CI [7.53e-05, 9.38e-03]                    | beta = -1.61, 95% CI [-4.54, 1.32], t(1610) = -1.08, p = 0.280; Std. beta = -0.11, 95% | F(1, 1454) = 2.63, p = 0.105; Eta2 (partial) = 1.81e-03, 90% CI [0.00, 7.29e-03]                        | beta = -0.86, 95% CI [-3.29, 1.57], t(1610) = -0.70, p = 0.486; Std. beta = -0.07, 95% | F(1, 1453) = 4.27, p = 0.039; Eta2 (partial) = 2.93e-03, 90% CI [7.69e-05, 9.39e-03]                    | beta = -1.63, 95% CI [-4.57, 1.31], t(1593) = -1.09, p = 0.277; Std. beta = -0.11, 95% | F(1, 1451) = 4.19, p = 0.041; Eta2 (partial) = 2.88e-03, 90% CI [6.21e-05, 9.31e-03]                    | beta = -1.61, 95% CI [-4.54, 1.32], t(1607) = -1.08, p = 0.280; Std. beta = -0.11, 95% | F(1, 1132) = 4.74, p = 0.030; Eta2 (partial) = 4.17e-03, 90% CI [2.14e-04, 0.01]                        | beta = -2.08, 95% CI [-5.42, 1.26], t(1245) = -1.22, p = 0.223; Std. beta = -0.14, 95% CI [- |                                                                                                         |

| Outcome | Groups          | Full dataset (n=1636)                                                  |                                                                                                         |                                                                                  |                                                                                                      |                                                                                  |                                                                                                      | Sensitivity Checks                                                               |                                                                                                      |                                                                                  |                                                                                                      |                                                                                  |                                                                                                      |                                                                                  |                                                                                                      |
|---------|-----------------|------------------------------------------------------------------------|---------------------------------------------------------------------------------------------------------|----------------------------------------------------------------------------------|------------------------------------------------------------------------------------------------------|----------------------------------------------------------------------------------|------------------------------------------------------------------------------------------------------|----------------------------------------------------------------------------------|------------------------------------------------------------------------------------------------------|----------------------------------------------------------------------------------|------------------------------------------------------------------------------------------------------|----------------------------------------------------------------------------------|------------------------------------------------------------------------------------------------------|----------------------------------------------------------------------------------|------------------------------------------------------------------------------------------------------|
|         |                 | Last 20 trials only                                                    |                                                                                                         |                                                                                  |                                                                                                      |                                                                                  |                                                                                                      | All trials                                                                       |                                                                                                      | Excluding non-lipophilic (n=1619)                                                |                                                                                                      | Excluding small gender groups (n=1631)                                           |                                                                                                      | Excluding understanding check fails (n=1271)                                     |                                                                                                      |
|         |                 | Uncorrected                                                            |                                                                                                         | Corrected for demographics                                                       |                                                                                                      | Corrected for all covariates                                                     |                                                                                                      |                                                                                  |                                                                                                      |                                                                                  |                                                                                                      |                                                                                  |                                                                                                      |                                                                                  |                                                                                                      |
|         |                 | ANCOVA                                                                 | Linear regression                                                                                       | ANCOVA                                                                           | Linear regression                                                                                    | ANCOVA                                                                           | Linear regression                                                                                    | ANCOVA                                                                           | Linear regression                                                                                    | ANCOVA                                                                           | Linear model                                                                                         | ANCOVA                                                                           | Linear model                                                                                         | ANCOVA                                                                           | Linear model                                                                                         |
|         |                 |                                                                        | CI [-0.41, -7.28e-03]                                                                                   |                                                                                  | CI [-0.30, 0.10]                                                                                     |                                                                                  | CI [-0.31, 0.09]                                                                                     |                                                                                  | CI [-0.27, 0.13]                                                                                     |                                                                                  | CI [-0.31, 0.09]                                                                                     |                                                                                  | CI [-0.31, 0.09]                                                                                     |                                                                                  | 0.37, 0.09]                                                                                          |
|         | Both vs neither | F(1, 1464) = 0.70, p = 0.402; Eta2 = 4.80e-04, 90% CI [0.00, 4.18e-03] | beta = -1.59, 95% CI [-4.66, 1.48], t(1632) = -1.02, p = 0.309; Std. beta = -0.11, 95% CI [-0.32, 0.10] | F(3, 1454) = 1.57, p = 0.194; Eta2 (partial) = 3.23e-03, 90% CI [0.00, 8.10e-03] | beta = 0.73, 95% CI [-2.47, 3.93], t(1623) = 0.45, p = 0.654; Std. beta = 0.05, 95% CI [-0.17, 0.27] | F(1, 1442) = 1.08, p = 0.299; Eta2 (partial) = 7.47e-04, 90% CI [0.00, 4.97e-03] | beta = 0.30, 95% CI [-2.92, 3.51], t(1610) = 0.18, p = 0.856; Std. beta = 0.02, 95% CI [-0.20, 0.24] | F(1, 1442) = 0.74, p = 0.389; Eta2 (partial) = 5.14e-04, 90% CI [0.00, 4.32e-03] | beta = 0.16, 95% CI [-2.50, 2.83], t(1610) = 0.12, p = 0.905; Std. beta = 0.01, 95% CI [-0.21, 0.24] | F(1, 1437) = 1.97, p = 0.160; Eta2 (partial) = 1.37e-03, 90% CI [0.00, 6.43e-03] | beta = 0.29, 95% CI [-3.58, 3.00], t(1593) = 0.17, p = 0.863; Std. beta = 0.02, 95% CI [-0.25, 0.21] | F(1, 1439) = 1.04, p = 0.307; Eta2 (partial) = 7.25e-04, 90% CI [0.00, 4.91e-03] | beta = 0.31, 95% CI [-2.91, 3.52], t(1607) = 0.19, p = 0.851; Std. beta = 0.02, 95% CI [-0.20, 0.24] | F(1, 1120) = 0.14, p = 0.707; Eta2 (partial) = 1.26e-04, 90% CI [0.00, 3.30e-03] | beta = 1.06, 95% CI [-2.68, 4.80], t(1245) = 0.55, p = 0.580; Std. beta = 0.07, 95% CI [-0.19, 0.33] |

# N-back

| Outcome                                    | Groups                   | Full dataset (n=1777)                                                                                                                                                               |                                                                                                             |                                                                                                                                                                                     |                                                                                                          |                                                                                                                                                                                 |                                                                                                             | Sensitivity Checks                                                                                                                                                                   |                                                                                                          |                                                                                                                                                                                 |                                                                                                             |
|--------------------------------------------|--------------------------|-------------------------------------------------------------------------------------------------------------------------------------------------------------------------------------|-------------------------------------------------------------------------------------------------------------|-------------------------------------------------------------------------------------------------------------------------------------------------------------------------------------|----------------------------------------------------------------------------------------------------------|---------------------------------------------------------------------------------------------------------------------------------------------------------------------------------|-------------------------------------------------------------------------------------------------------------|--------------------------------------------------------------------------------------------------------------------------------------------------------------------------------------|----------------------------------------------------------------------------------------------------------|---------------------------------------------------------------------------------------------------------------------------------------------------------------------------------|-------------------------------------------------------------------------------------------------------------|
|                                            |                          | Uncorrected                                                                                                                                                                         |                                                                                                             | Corrected for demographics                                                                                                                                                          |                                                                                                          | Corrected for all covariates                                                                                                                                                    |                                                                                                             | Corrected for all covariates                                                                                                                                                         |                                                                                                          | Excluding non-lipophilic (n=1755)                                                                                                                                               | Excluding small gender groups (n=1772)                                                                      |
|                                            |                          | ANCOVA                                                                                                                                                                              | Linear regression                                                                                           | ANCOVA                                                                                                                                                                              | Linear regression                                                                                        | ANCOVA                                                                                                                                                                          | Linear regression                                                                                           | ANCOVA                                                                                                                                                                               | Linear regression                                                                                        | ANCOVA                                                                                                                                                                          | Linear regression                                                                                           |
| <b>Hits- Zero back (control condition)</b> | <b>All</b>               | F(3, 1773) = 0.21, p = 0.888; Eta2 = 3.60e-04, 90% CI [0.00, 1.04e-03]                                                                                                              | N/A                                                                                                         | F(3) = 1.15, p = 0.329; Eta2 (partial) = 1.94e-03, 90% CI [0.00, 5.32e-03]                                                                                                          | N/A                                                                                                      | F(3, 1709) = 0.16, p = 0.923; Eta2 (partial) = 2.80e-04, 90% CI [0.00, 5.51e-04]                                                                                                | N/A                                                                                                         | F(3, 1687) = 0.20, p = 0.899; Eta2 (partial) = 3.50e-04, 90% CI [0.00, 9.42e-04]                                                                                                     | N/A                                                                                                      | F(3, 1706) = 0.17, p = 0.918; Eta2 (partial) = 2.96e-04, 90% CI [0.00, 6.65e-04]                                                                                                | N/A                                                                                                         |
| <b>Hits- All test conditions</b>           | <b>All</b>               | Group: F(3) = 3.73, p = 0.011; Eta2 (partial) = 6.28e-03, 90% CI [8.21e-04, 0.01]<br><br>Interaction: F(6) = 3.80, p < .001; Eta2 (partial) = 6.38e-03, 90% CI [1.63e-03, 9.88e-03] | N/A                                                                                                         | Group: F(3) = 1.15, p = 0.329; Eta2 (partial) = 1.94e-03, 90% CI [0.00, 5.32e-03]<br><br>Interaction: F(6) = 3.80, p < .001; Eta2 (partial) = 6.38e-03, 90% CI [1.63e-03, 9.88e-03] | N/A                                                                                                      | Group: F(3) = 1.60, p = 0.187; Eta2 (partial) = 2.80e-03, 90% CI [0.00, 6.27e-03]<br><br>Interaction: F(6) = 3.77, p < .001; Eta2 (partial) = 6.50e-03, 90% CI [1.63e-03, 0.01] | N/A                                                                                                         | Group: F(3) = 2.39, p = 0.067; Eta2 (partial) = 4.23e-03, 90% CI [0.00, 9.46e-03]<br><br>Interaction: F(6) = 3.55, p = 0.002; Eta2 (partial) = 6.21e-03, 90% CI [1.41e-03, 9.68e-03] | N/A                                                                                                      | Group: F(3) = 1.59, p = 0.191; Eta2 (partial) = 2.78e-03, 90% CI [0.00, 6.96e-03]<br><br>Interaction: F(6) = 3.89, p < .001; Eta2 (partial) = 6.73e-03, 90% CI [1.77e-03, 0.01] | N/A                                                                                                         |
| <b>Hits - One back</b>                     | <b>All</b>               | F(3, 1773) = 4.88, p = 0.002; Eta2 = 8.19e-03, 90% CI [1.82e-03, 0.02]                                                                                                              | N/A                                                                                                         | F(3, 1764) = 4.92, p = 0.002; Eta2 (partial) = 8.31e-03, 90% CI [1.87e-03, 0.02]                                                                                                    | N/A                                                                                                      | F(3, 1709) = 4.63, p = 0.003; Eta2 (partial) = 8.06e-03, 90% CI [1.65e-03, 0.02]                                                                                                | N/A                                                                                                         | F(3, 1687) = 4.97, p = 0.002; Eta2 (partial) = 8.76e-03, 90% CI [2.00e-03, 0.02]                                                                                                     | N/A                                                                                                      | F(3, 1706) = 4.74, p = 0.003; Eta2 (partial) = 8.27e-03, 90% CI [1.76e-03, 0.02]                                                                                                | N/A                                                                                                         |
|                                            | <b>Statin vs Neither</b> | F(1, 1553) = 1.06, p = 0.302; Eta2 = 6.85e-04, 90% CI [0.00, 4.59e-03]                                                                                                              | beta = -3.20, 95% CI [-9.30, 2.90], t(1773) = -1.03, p = 0.304; Std. beta = -0.12, 95% CI [-0.35, 0.11]     | F(1, 1544) = 1.07, p = 0.300; Eta2 (partial) = 6.94e-04, 90% CI [0.00, 4.63e-03]                                                                                                    | beta = -1.06, 95% CI [-7.34, 5.21], t(1764) = -0.33, p = 0.740; Std. beta = -0.04, 95% CI [-0.28, 0.20]  | F(1, 1494) = 0.29, p = 0.589; Eta2 (partial) = 1.95e-04, 90% CI [0.00, 3.09e-03]                                                                                                | beta = -0.05, 95% CI [-6.46, 6.35], t(1709) = -0.02, p = 0.987; Std. beta = -2.01e-03, 95% CI [-0.24, 0.24] | F(1, 1477) = 0.02, p = 0.898; Eta2 (partial) = 1.11e-05, 90% CI [0.00, 9.69e-04]                                                                                                     | beta = 2.03, 95% CI [-5.07, 9.13], t(1687) = 0.56, p = 0.574; Std. beta = 0.08, 95% CI [-0.19, 0.34]     | F(1, 1492) = 0.29, p = 0.587; Eta2 (partial) = 1.97e-04, 90% CI [0.00, 3.10e-03]                                                                                                | beta = -0.05, 95% CI [-6.46, 6.36], t(1706) = -0.02, p = 0.988; Std. beta = -1.85e-03, 95% CI [-0.24, 0.24] |
|                                            | <b>BP vs Neither</b>     | F(1, 1596) = 11.14, p < .001; Eta2 = 6.93e-03, 90% CI [1.79e-03, 0.02]                                                                                                              | (beta = -8.38, 95% CI [-13.33, -3.42], t(1773) = -3.32, p < .001; Std. beta = -0.31, 95% CI [-0.50, -0.13]) | F(1, 1587) = 11.24, p < .001; Eta2 (partial) = 7.03e-03, 90% CI [1.83e-03, 0.02]                                                                                                    | beta = -6.80, 95% CI [-11.85, -1.75], t(1764) = -2.64, p < .01; Std. beta = -0.25, 95% CI [-0.44, -0.07] | F(1, 1536) = 11.38, p < .001; Eta2 (partial) = 7.35e-03, 90% CI [1.93e-03, 0.02]                                                                                                | beta = -7.41, 95% CI [-12.56, -2.26], t(1709) = -2.82, p < .01; Std. beta = -0.28, 95% CI [-0.47, -0.08]    | F(1, 1534) = 11.42, p < .001; Eta2 (partial) = 7.39e-03, 90% CI [1.95e-03, 0.02]                                                                                                     | beta = -7.51, 95% CI [-12.66, -2.37], t(1687) = -2.86, p < .01; Std. beta = -0.28, 95% CI [-0.48, -0.09] | F(1, 1533) = 11.73, p < .001; Eta2 (partial) = 7.59e-03, 90% CI [2.05e-03, 0.02]                                                                                                | beta = -7.44, 95% CI [-12.61, -2.27], t(1706) = -2.82, p < .01; Std. beta = -0.28, 95% CI [-0.47, -0.09]    |

| Outcome                  | Groups                   | Full dataset (n=1777)                                                      |                                                                                                              |                                                                                      |                                                                                                          |                                                                                  |                                                                                                          | Sensitivity Checks                                                                   |                                                                                                          |                                                                                  |                                                                                                          |
|--------------------------|--------------------------|----------------------------------------------------------------------------|--------------------------------------------------------------------------------------------------------------|--------------------------------------------------------------------------------------|----------------------------------------------------------------------------------------------------------|----------------------------------------------------------------------------------|----------------------------------------------------------------------------------------------------------|--------------------------------------------------------------------------------------|----------------------------------------------------------------------------------------------------------|----------------------------------------------------------------------------------|----------------------------------------------------------------------------------------------------------|
|                          |                          |                                                                            |                                                                                                              |                                                                                      |                                                                                                          |                                                                                  |                                                                                                          | Excluding non-lipophilic (n=1755)                                                    |                                                                                                          | Excluding small gender groups (n=1772)                                           |                                                                                                          |
|                          |                          | Uncorrected                                                                |                                                                                                              | Corrected for demographics                                                           |                                                                                                          | Corrected for all covariates                                                     |                                                                                                          | Corrected for all covariates                                                         |                                                                                                          |                                                                                  |                                                                                                          |
| ANCOVA                   | Linear regression        | ANCOVA                                                                     | Linear regression                                                                                            | ANCOVA                                                                               | Linear regression                                                                                        | ANCOVA                                                                           | Linear regression                                                                                        | ANCOVA                                                                               | Linear regression                                                                                        | ANCOVA                                                                           | Linear regression                                                                                        |
|                          | <b>Both vs Neither</b>   | F(1, 1578) = 3.95, p = 0.047; Eta2 = 2.50e-03, 90% CI [1.73e-05, 8.30e-03] | beta = -5.41, 95% CI [-10.75, -0.06], t(1773) = -1.98, p < .05; Std. beta = -0.20, 95% CI [-0.40, -2.41e-03] | F(1, 1569) = 3.98, p = 0.046; Eta2 (partial) = 2.53e-03, 90% CI [2.27e-05, 8.38e-03] | beta = -3.29, 95% CI [-8.88, 2.29], t(1764) = -1.16, p = 0.247; Std. beta = -0.12, 95% CI [-0.33, 0.09]  | F(1, 1521) = 3.32, p = 0.069; Eta2 (partial) = 2.18e-03, 90% CI [0.00, 7.84e-03] | beta = -3.95, 95% CI [-9.64, 1.74], t(1709) = -1.36, p = 0.173; Std. beta = -0.15, 95% CI [-0.36, 0.07]  | F(1, 1514) = 4.25, p = 0.039; Eta2 (partial) = 2.80e-03, 90% CI [7.05e-05, 9.00e-03] | beta = -4.68, 95% CI [-10.48, 1.13], t(1687) = -1.58, p = 0.114; Std. beta = -0.18, 95% CI [-0.39, 0.04] | F(1, 1519) = 3.33, p = 0.068; Eta2 (partial) = 2.19e-03, 90% CI [0.00, 7.87e-03] | beta = -3.96, 95% CI [-9.65, 1.73], t(1706) = -1.36, p = 0.172; Std. beta = -0.15, 95% CI [-0.36, 0.06]  |
| <b>Hits – Two back</b>   | <b>All groups</b>        | F(3, 1773) = 4.33, p = 0.005; Eta2 = 7.27e-03, 90% CI [1.32e-03, 0.01]     | N/A                                                                                                          | F(3, 1764) = 4.38, p = 0.004; Eta2 (partial) = 7.39e-03, 90% CI [1.37e-03, 0.01]     | N/A                                                                                                      | F(3, 1709) = 4.28, p = 0.005; Eta2 (partial) = 7.46e-03, 90% CI [1.33e-03, 0.01] | N/A                                                                                                      | F(3, 1687) = 5.02, p = 0.002; Eta2 (partial) = 8.85e-03, 90% CI [2.05e-03, 0.02]     | N/A                                                                                                      | F(3, 1706) = 4.31, p = 0.005; Eta2 (partial) = 7.53e-03, 90% CI [1.36e-03, 0.01] | N/A                                                                                                      |
|                          | <b>Statin vs Neither</b> | F(1, 1553) = 0.69, p = 0.407; Eta2 = 4.43e-04, 90% CI [0.00, 3.91e-03]     | beta = -2.05, 95% CI [-6.87, 2.77], t(1773) = -0.83, p = 0.405; Std. beta = -0.10, 95% CI [-0.33, 0.13]      | F(1, 1544) = 0.70, p = 0.404; Eta2 (partial) = 4.50e-04, 90% CI [0.00, 3.97e-03]     | beta = 0.14, 95% CI [-4.81, 5.10], t(1764) = 0.06, p = 0.954; Std. beta = 6.88e-03, 95% CI [-0.23, 0.24] | F(1, 1494) = 0.54, p = 0.462; Eta2 (partial) = 3.63e-04, 90% CI [0.00, 3.75e-03] | beta = 0.11, 95% CI [-4.98, 5.20], t(1709) = 0.04, p = 0.966; Std. beta = 5.15e-03, 95% CI [-0.24, 0.25] | F(1, 1477) = 0.10, p = 0.755; Eta2 (partial) = 6.57e-05, 90% CI [0.00, 2.21e-03]     | beta = 1.08, 95% CI [-4.57, 6.74], t(1687) = 0.38, p = 0.707; Std. beta = 0.05, 95% CI [-0.22, 0.32]     | F(1, 1492) = 0.56, p = 0.455; Eta2 (partial) = 3.74e-04, 90% CI [0.00, 3.79e-03] | beta = 0.10, 95% CI [-4.99, 5.20], t(1706) = 0.04, p = 0.969; Std. beta = 4.84e-03, 95% CI [-0.24, 0.25] |
|                          | <b>BP vs Neither</b>     | F(1, 1596) = 0.05, p = 0.817; Eta2 = 3.36e-05, 90% CI [0.00, 1.64e-03]     | beta = -0.47, 95% CI [-4.38, 3.45], t(1773) = -0.23, p = 0.816; Std. beta = -0.02, 95% CI [-0.21, 0.16]      | F(1, 1587) = 0.05, p = 0.816; Eta2 (partial) = 3.42e-05, 90% CI [0.00, 1.67e-03]     | beta = 1.08, 95% CI [-2.91, 5.07], t(1764) = 0.53, p = 0.595; Std. beta = 0.05, 95% CI [-0.14, 0.24]     | F(1, 1536) = 0.14, p = 0.707; Eta2 (partial) = 9.23e-05, 90% CI [0.00, 2.41e-03] | beta = 0.60, 95% CI [-3.50, 4.69], t(1709) = 0.29, p = 0.775; Std. beta = 0.03, 95% CI [-0.17, 0.22]     | F(1, 1534) = 0.14, p = 0.710; Eta2 (partial) = 9.01e-05, 90% CI [0.00, 2.39e-03]     | beta = 0.55, 95% CI [-3.55, 4.64], t(1687) = 0.26, p = 0.794; Std. beta = 0.03, 95% CI [-0.17, 0.22]     | F(1, 1533) = 0.13, p = 0.719; Eta2 (partial) = 8.43e-05, 90% CI [0.00, 2.34e-03] | beta = 0.61, 95% CI [-3.50, 4.73], t(1706) = 0.29, p = 0.769; Std. beta = 0.03, 95% CI [-0.17, 0.22]     |
|                          | <b>Both vs Neither</b>   | F(1, 1578) = 12.69, p < .001; Eta2 = 7.98e-03, 90% CI [2.32e-03, 0.02]     | (beta = -7.63, 95% CI [-11.85, -3.41], t(1773) = -3.55, p < .001; Std. beta = -0.36, 95% CI [-0.56, -0.16])  | F(1, 1569) = 12.81, p < .001; Eta2 (partial) = 8.10e-03, 90% CI [2.37e-03, 0.02]     | beta = -5.22, 95% CI [-9.63, -0.81], t(1764) = -2.32, p < .05; Std. beta = -0.25, 95% CI [-0.46, -0.04]  | F(1, 1521) = 12.65, p < .001; Eta2 (partial) = 8.25e-03, 90% CI [2.39e-03, 0.02] | beta = -6.00, 95% CI [-10.52, -1.48], t(1709) = -2.60, p < .01; Std. beta = -0.28, 95% CI [-0.50, -0.07] | F(1, 1514) = 15.20, p < .001; Eta2 (partial) = 9.94e-03, 90% CI [3.33e-03, 0.02]     | beta = -6.97, 95% CI [-11.59, -2.35], t(1687) = -2.96, p < .01; Std. beta = -0.33, 95% CI [-0.55, -0.11] | F(1, 1519) = 12.74, p < .001; Eta2 (partial) = 8.32e-03, 90% CI [2.42e-03, 0.02] | beta = -6.00, 95% CI [-10.53, -1.48], t(1706) = -2.60, p < .01; Std. beta = -0.28, 95% CI [-0.50, -0.07] |
| <b>Hits – Three back</b> | <b>All groups</b>        | F(3, 1773) = 0.98, p = 0.401; Eta2 = 1.66e-03, 90% CI [0.00, 4.72e-03]     | N/A                                                                                                          | F(3, 1764) = 1.00, p = 0.393; Eta2 (partial) = 1.69e-03, 90% CI [0.00, 4.80e-03]     | N/A                                                                                                      | F(3, 1709) = 1.02, p = 0.381; Eta2 (partial) = 1.79e-03, 90% CI [0.00, 5.05e-03] | N/A                                                                                                      | F(3, 1687) = 1.24, p = 0.293; Eta2 (partial) = 2.20e-03, 90% CI [0.00, 5.89e-03]     | N/A                                                                                                      | F(3, 1706) = 1.01, p = 0.386; Eta2 (partial) = 1.78e-03, 90% CI [0.00, 5.02e-03] | N/A                                                                                                      |
|                          | <b>Statin vs Neither</b> | F(1, 1553) = 0.70, p = 0.403; Eta2 = 4.50e-04, 90% CI [0.00, 3.93e-03]     | beta = 1.93, 95% CI [-2.61, 6.46], t(1773) = 0.83, p = 0.405; Std. beta = 0.10, 95% CI [-0.13, 0.33]         | F(1, 1544) = 0.71, p = 0.399; Eta2 (partial) = 4.60e-04, 90% CI [0.00, 3.98e-03]     | beta = 4.68, 95% CI [0.03, 9.33], t(1764) = 1.97, p < .05; Std. beta = 0.24, 95% CI [1.49e-03, 0.47]     | F(1, 1494) = 1.22, p = 0.270; Eta2 (partial) = 8.14e-04, 90% CI [0.00, 5.05e-03] | beta = 5.34, 95% CI [0.58, 10.10], t(1709) = 2.20, p < .05; Std. beta = 0.27, 95% CI [0.03, 0.51]        | F(1, 1477) = 1.08, p = 0.300; Eta2 (partial) = 7.27e-04, 90% CI [0.00, 4.84e-03]     | beta = 5.65, 95% CI [0.37, 10.92], t(1687) = 2.10, p < .05; Std. beta = 0.29, 95% CI [0.02, 0.55]        | F(1, 1492) = 1.23, p = 0.268; Eta2 (partial) = 8.21e-04, 90% CI [0.00, 5.05e-03] | beta = 5.35, 95% CI [0.58, 10.11], t(1706) = 2.20, p < .05; Std. beta = 0.27, 95% CI [0.03, 0.51]        |

| Outcome                                                   | Groups                 | Full dataset (n=1777)                                                                                                                                                        |                                                                                                         |                                                                                                                                                                                  |                                                                                                      |                                                                                                                                                                                  |                                                                                                      | Sensitivity Checks                                                                                                                                                                   |                                                                                                         |                                                                                                                                                                                  |                                                                                                      |
|-----------------------------------------------------------|------------------------|------------------------------------------------------------------------------------------------------------------------------------------------------------------------------|---------------------------------------------------------------------------------------------------------|----------------------------------------------------------------------------------------------------------------------------------------------------------------------------------|------------------------------------------------------------------------------------------------------|----------------------------------------------------------------------------------------------------------------------------------------------------------------------------------|------------------------------------------------------------------------------------------------------|--------------------------------------------------------------------------------------------------------------------------------------------------------------------------------------|---------------------------------------------------------------------------------------------------------|----------------------------------------------------------------------------------------------------------------------------------------------------------------------------------|------------------------------------------------------------------------------------------------------|
|                                                           |                        | Uncorrected                                                                                                                                                                  |                                                                                                         | Corrected for demographics                                                                                                                                                       |                                                                                                      | Corrected for all covariates                                                                                                                                                     |                                                                                                      | Excluding non-lipophilic (n=1755)                                                                                                                                                    |                                                                                                         | Excluding small gender groups (n=1772)                                                                                                                                           |                                                                                                      |
|                                                           |                        | ANCOVA                                                                                                                                                                       | Linear regression                                                                                       | ANCOVA                                                                                                                                                                           | Linear regression                                                                                    | ANCOVA                                                                                                                                                                           | Linear regression                                                                                    | ANCOVA                                                                                                                                                                               | Linear regression                                                                                       | ANCOVA                                                                                                                                                                           | Linear regression                                                                                    |
|                                                           | <b>BP vs Neither</b>   | F(1, 1596) = 0.72, p = 0.396; Eta2 = 4.51e-04, 90% CI [0.00, 3.87e-03]                                                                                                       | beta = -1.58, 95% CI [-5.27, 2.10], t(1773) = -0.84, p = 0.399; Std. beta = -0.08, 95% CI [-0.27, 0.11] | F(1, 1587) = 0.73, p = 0.392; Eta2 (partial) = 4.61e-04, 90% CI [0.00, 3.91e-03]                                                                                                 | beta = 0.24, 95% CI [-3.50, 3.98], t(1764) = 0.12, p = 0.901; Std. beta = 0.01, 95% CI [-0.18, 0.20] | F(1, 1536) = 0.63, p = 0.428; Eta2 (partial) = 4.09e-04, 90% CI [0.00, 3.83e-03]                                                                                                 | beta = 0.37, 95% CI [-3.46, 4.20], t(1709) = 0.19, p = 0.851; Std. beta = 0.02, 95% CI [-0.17, 0.21] | F(1, 1534) = 0.63, p = 0.427; Eta2 (partial) = 4.12e-04, 90% CI [0.00, 3.85e-03]                                                                                                     | eta = 0.38, 95% CI [-3.44, 4.21], t(1687) = 0.20, p = 0.844; Std. beta = 0.02, 95% CI [-0.17, 0.21]     | F(1, 1533) = 0.60, p = 0.440; Eta2 (partial) = 3.89e-04, 90% CI [0.00, 3.78e-03]                                                                                                 | beta = 0.47, 95% CI [-3.37, 4.32], t(1706) = 0.24, p = 0.809; Std. beta = 0.02, 95% CI [-0.17, 0.22] |
|                                                           | <b>Both vs Neither</b> | F(1, 1578) = 1.46, p = 0.227; Eta2 = 9.26e-04, 90% CI [0.00, 5.14e-03]                                                                                                       | beta = -2.45, 95% CI [-6.42, 1.52], t(1773) = -1.21, p = 0.227; Std. beta = -0.12, 95% CI [-0.32, 0.08] | F(1, 1569) = 1.49, p = 0.223; Eta2 (partial) = 9.47e-04, 90% CI [0.00, 5.20e-03]                                                                                                 | beta = 0.48, 95% CI [-3.65, 4.62], t(1764) = 0.23, p = 0.819; Std. beta = 0.02, 95% CI [-0.18, 0.23] | F(1, 1521) = 1.11, p = 0.293; Eta2 (partial) = 7.28e-04, 90% CI [0.00, 4.76e-03]                                                                                                 | beta = 0.58, 95% CI [-3.65, 4.80], t(1709) = 0.27, p = 0.788; Std. beta = 0.03, 95% CI [-0.18, 0.24] | F(1, 1514) = 1.93, p = 0.165; Eta2 (partial) = 1.27e-03, 90% CI [0.00, 6.04e-03]                                                                                                     | beta = -0.21, 95% CI [-4.52, 4.10], t(1687) = -0.10, p = 0.924; Std. beta = -0.01, 95% CI [-0.23, 0.21] | F(1, 1519) = 1.10, p = 0.295; Eta2 (partial) = 7.21e-04, 90% CI [0.00, 4.74e-03]                                                                                                 | beta = 0.58, 95% CI [-3.65, 4.81], t(1706) = 0.27, p = 0.787; Std. beta = 0.03, 95% CI [-0.18, 0.24] |
| <b>False alarms - Zero back (control condition)</b>       | <b>All groups</b>      | F(3, 1773) = 2.25, p = 0.081; Eta2 = 3.79e-03, 90% CI [0.00, 8.62e-03]                                                                                                       | N/A                                                                                                     | F(3, 1764) = 2.28, p = 0.077; Eta2 (partial) = 3.87e-03, 90% CI [0.00, 8.76e-03]                                                                                                 | N/A                                                                                                  | F(3, 1709) = 2.03, p = 0.108; Eta2 (partial) = 3.55e-03, 90% CI [0.00, 8.29e-03]                                                                                                 | N/A                                                                                                  | F(3, 1687) = 1.13, p = 0.337; Eta2 (partial) = 2.00e-03, 90% CI [0.00, 5.49e-03]                                                                                                     | N/A                                                                                                     | F(3, 1706) = 2.02, p = 0.109; Eta2 (partial) = 3.55e-03, 90% CI [0.00, 8.30e-03]                                                                                                 | N/A                                                                                                  |
| <b>False alarms – All test conditions</b>                 | <b>All groups</b>      | Group: F(3) = 0.10, p = 0.960; Eta2 (partial) = 1.69e-04, 90% CI [0.00, 0.00]<br><br>Interaction: F(6) = 1.99, p = 0.064; Eta2 (partial) = 3.36e-03, 90% CI [0.00, 5.58e-03] | N/A                                                                                                     | Group: F(3) = 0.17, p = 0.920; Eta2 (partial) = 2.82e-04, 90% CI [0.00, 5.96e-04]<br><br>Interaction: F(6) = 1.99, p = 0.064; Eta2 (partial) = 3.36e-03, 90% CI [0.00, 7.50e-03] | N/A                                                                                                  | Group: F(3) = 0.25, p = 0.863; Eta2 (partial) = 4.34e-04, 90% CI [0.00, 1.36e-03]<br><br>Interaction: F(6) = 1.93, p = 0.073; Eta2 (partial) = 3.33e-03, 90% CI [0.00, 5.55e-03] | N/A                                                                                                  | Group: F(3) = 0.47, p = 0.703; Eta2 (partial) = 8.36e-04, 90% CI [0.00, 2.78e-03]<br><br>Interaction: F(6) = 2.46, p = 0.022; Eta2 (partial) = 4.31e-03, 90% CI [3.18e-04, 7.02e-03] | N/A                                                                                                     | Group: F(3) = 0.25, p = 0.862; Eta2 (partial) = 4.38e-04, 90% CI [0.00, 1.38e-03]<br><br>Interaction: F(6) = 1.89, p = 0.079; Eta2 (partial) = 3.27e-03, 90% CI [0.00, 5.46e-03] | N/A                                                                                                  |
| <b>Correct rejections - Zero back (control condition)</b> | <b>All groups</b>      | F(3, 1773) = 0.99, p = 0.396; Eta2 = 1.67e-03, 90% CI [0.00, 4.75e-03]                                                                                                       | N/A                                                                                                     | F(3, 1764) = 1.02, p = 0.384; Eta2 (partial) = 1.73e-03, 90% CI [0.00, 4.87e-03]                                                                                                 | N/A                                                                                                  | F(3, 1709) = 0.88, p = 0.450; Eta2 (partial) = 1.55e-03, 90% CI [0.00, 4.52e-03]                                                                                                 | N/A                                                                                                  | F(3, 1687) = 0.68, p = 0.566; Eta2 (partial) = 1.20e-03, 90% CI [0.00, 3.75e-03]                                                                                                     | N/A                                                                                                     | F(3, 1706) = 0.88, p = 0.453; Eta2 (partial) = 1.54e-03, 90% CI [0.00, 4.51e-03]                                                                                                 | N/A                                                                                                  |
| <b>Correct rejections – All test conditions</b>           | <b>All groups</b>      | Group: F(3) = 1.99, p = 0.114; Eta2 (partial) = 3.35e-03, 90% CI [0.00, 7.88e-03]<br><br>Interaction: F(6) = 0.72, p =                                                       | N/A                                                                                                     | Group: F(3) = 0.52, p = 0.672; Eta2 (partial) = 8.75e-04, 90% CI [0.00, 2.87e-03]<br><br>Interaction: F(6) = 0.72, p =                                                           | N/A                                                                                                  | Group: F(3) = 0.85, p = 0.469; Eta2 (partial) = 1.48e-03, 90% CI [0.00, 4.39e-03]<br><br>Interaction: F(6) = 0.77, p =                                                           | N/A                                                                                                  | Group: F(3) = 0.78, p = 0.507; Eta2 (partial) = 1.38e-03, 90% CI [0.00, 4.17e-03]<br><br>Interaction: F(6) = 0.81, p =                                                               | N/A                                                                                                     | Group: F(3) = 0.82, p = 0.481; Eta2 (partial) = 1.44e-03, 90% CI [0.00, 4.30e-03]<br><br>Interaction: F(6) = 0.76, p =                                                           | N/A                                                                                                  |

| Outcome                                | Groups            | Full dataset (n=1777)                                                                                                                                                           |                                                                                                      |                                                                                                                                                                                 |                                                                                                      |                                                                                                                                                                                 |                                                                                                      | Sensitivity Checks                                                                                                                                                              |                                                                                                         |                                                                                                                                                                                 |                                                                                                      |
|----------------------------------------|-------------------|---------------------------------------------------------------------------------------------------------------------------------------------------------------------------------|------------------------------------------------------------------------------------------------------|---------------------------------------------------------------------------------------------------------------------------------------------------------------------------------|------------------------------------------------------------------------------------------------------|---------------------------------------------------------------------------------------------------------------------------------------------------------------------------------|------------------------------------------------------------------------------------------------------|---------------------------------------------------------------------------------------------------------------------------------------------------------------------------------|---------------------------------------------------------------------------------------------------------|---------------------------------------------------------------------------------------------------------------------------------------------------------------------------------|------------------------------------------------------------------------------------------------------|
|                                        |                   |                                                                                                                                                                                 |                                                                                                      |                                                                                                                                                                                 |                                                                                                      |                                                                                                                                                                                 |                                                                                                      | Excluding non-lipophilic (n=1755)                                                                                                                                               |                                                                                                         | Excluding small gender groups (n=1772)                                                                                                                                          |                                                                                                      |
|                                        |                   | Uncorrected                                                                                                                                                                     |                                                                                                      | Corrected for demographics                                                                                                                                                      |                                                                                                      | Corrected for all covariates                                                                                                                                                    |                                                                                                      | Corrected for all covariates                                                                                                                                                    |                                                                                                         |                                                                                                                                                                                 |                                                                                                      |
| ANCOVA                                 | Linear regression | ANCOVA                                                                                                                                                                          | Linear regression                                                                                    | ANCOVA                                                                                                                                                                          | Linear regression                                                                                    | ANCOVA                                                                                                                                                                          | Linear regression                                                                                    | ANCOVA                                                                                                                                                                          | Linear regression                                                                                       | ANCOVA                                                                                                                                                                          | Linear regression                                                                                    |
|                                        |                   | 0.634; Eta2 (partial) = 1.22e-03, 90% CI [0.00, 1.94e-03]                                                                                                                       |                                                                                                      | 0.634; Eta2 (partial) = 1.22e-03, 90% CI [0.00, 1.94e-03]                                                                                                                       |                                                                                                      | 0.593; Eta2 (partial) = 1.34e-03, 90% CI [0.00, 2.99e-03]                                                                                                                       |                                                                                                      | 0.560; Eta2 (partial) = 1.42e-03, 90% CI [0.00, 2.34e-03]                                                                                                                       |                                                                                                         | 0.599; Eta2 (partial) = 1.32e-03, 90% CI [0.00, 2.15e-03]                                                                                                                       |                                                                                                      |
| Misses - Zero back (control condition) | All groups        | F(3, 1773) = 0.95, p = 0.414; Eta2 = 1.61e-03, 90% CI [0.00, 4.62e-03]                                                                                                          | N/A                                                                                                  | F(3, 1764) = 0.97, p = 0.405; Eta2 (partial) = 1.65e-03, 90% CI [0.00, 4.71e-03]                                                                                                | N/A                                                                                                  | F(3, 1709) = 0.81, p = 0.489; Eta2 (partial) = 1.42e-03, 90% CI [0.00, 4.24e-03]                                                                                                | N/A                                                                                                  | F(3, 1687) = 0.85, p = 0.465; Eta2 (partial) = 1.51e-03, 90% CI [0.00, 4.47e-03]                                                                                                | N/A                                                                                                     | F(3, 1706) = 0.91, p = 0.437; Eta2 (partial) = 1.59e-03, 90% CI [0.00, 4.53e-03]                                                                                                | N/A                                                                                                  |
| Misses – All test conditions           | All groups        | Group: F(3) = 0.87, p = 0.454; Eta2 (partial) = 1.48e-03, 90% CI [0.00, 4.33e-03]<br><br>Interaction: F(6) = 4.55, p < .001; Eta2 (partial) = 7.64e-03, 90% CI [2.44e-03, 0.01] | N/A                                                                                                  | Group: F(3) = 0.82, p = 0.483; Eta2 (partial) = 1.39e-03, 90% CI [0.00, 4.15e-03]<br><br>Interaction: F(6) = 4.55, p < .001; Eta2 (partial) = 7.64e-03, 90% CI [2.44e-03, 0.01] | N/A                                                                                                  | Group: F(3) = 1.02, p = 0.384; Eta2 (partial) = 1.78e-03, 90% CI [0.00, 5.03e-03]<br><br>Interaction: F(6) = 4.55, p < .001; Eta2 (partial) = 7.83e-03, 90% CI [2.50e-03, 0.01] | N/A                                                                                                  | Group: F(3) = 1.22, p = 0.302; Eta2 (partial) = 2.16e-03, 90% CI [0.00, 5.81e-03]<br><br>Interaction: F(6) = 4.45, p < .001; Eta2 (partial) = 7.76e-03, 90% CI [2.41e-03, 0.01] | N/A                                                                                                     | Group: F(3) = 1.02, p = 0.384; Eta2 (partial) = 1.79e-03, 90% CI [0.00, 5.04e-03]<br><br>Interaction: F(6) = 4.63, p < .001; Eta2 (partial) = 7.98e-03, 90% CI [2.59e-03, 0.01] | N/A                                                                                                  |
| Misses – One back                      | All groups        | F(3, 1773) = 4.10, p = 0.007; Eta2 = 6.89e-03, 90% CI [1.12e-03, 0.01]                                                                                                          | N/A                                                                                                  | F(3, 1764) = 4.12, p = 0.006; Eta2 (partial) = 6.96e-03, 90% CI [1.15e-03, 0.01]                                                                                                | N/A                                                                                                  | F(3, 1709) = 4.40, p = 0.004; Eta2 (partial) = 7.66e-03, 90% CI [1.43e-03, 0.01]                                                                                                | N/A                                                                                                  | F(3, 1687) = 4.45, p = 0.004; Eta2 (partial) = 7.85e-03, 90% CI [1.50e-03, 0.01]                                                                                                | N/A                                                                                                     | F(3, 1706) = 4.41, p = 0.004; Eta2 (partial) = 7.69e-03, 90% CI [1.44e-03, 0.01]                                                                                                | N/A                                                                                                  |
|                                        | Statin vs Neither | F(1, 1553) = 0.93, p = 0.334; Eta2 = 6.01e-04, 90% CI [0.00, 4.37e-03]                                                                                                          | beta = 2.46, 95% CI [-2.57, 7.48], t(1773) = 0.96, p = 0.338; Std. beta = 0.11, 95% CI [-0.12, 0.34] | F(1, 1544) = 0.94, p = 0.333; Eta2 (partial) = 6.08e-04, 90% CI [0.00, 4.40e-03]                                                                                                | beta = 1.15, 95% CI [-4.03, 6.33], t(1764) = 0.43, p = 0.664; Std. beta = 0.05, 95% CI [-0.18, 0.29] | F(1, 1494) = 0.85, p = 0.356; Eta2 (partial) = 5.70e-04, 90% CI [0.00, 4.39e-03]                                                                                                | beta = 1.38, 95% CI [-3.93, 6.69], t(1709) = 0.51, p = 0.611; Std. beta = 0.06, 95% CI [-0.18, 0.30] | F(1, 1477) = 0.02, p = 0.895; Eta2 (partial) = 1.19e-05, 90% CI [0.00, 1.01e-03]                                                                                                | beta = -0.59, 95% CI [-6.46, 5.28], t(1687) = -0.20, p = 0.844; Std. beta = -0.03, 95% CI [-0.29, 0.24] | F(1, 1492) = 0.87, p = 0.351; Eta2 (partial) = 5.82e-04, 90% CI [0.00, 4.42e-03]                                                                                                | beta = 1.37, 95% CI [-3.95, 6.69], t(1706) = 0.51, p = 0.613; Std. beta = 0.06, 95% CI [-0.18, 0.30] |
|                                        | BP vs Neither     | F(1, 1596) = 9.77, p = 0.002; Eta2 = 6.08e-03, 90% CI [1.37e-03, 0.01]                                                                                                          | beta = 6.48, 95% CI [2.40, 10.56], t(1773) = 3.12, p < .01; Std. beta = 0.30, 95% CI [0.11, 0.48]    | F(1, 1587) = 9.82, p = 0.002; Eta2 (partial) = 6.15e-03, 90% CI [1.39e-03, 0.01]                                                                                                | beta = 5.56, 95% CI [1.39, 9.73], t(1764) = 2.61, p < .01; Std. beta = 0.25, 95% CI [0.06, 0.44]     | F(1, 1536) = 10.62, p = 0.001; Eta2 (partial) = 6.87e-03, 90% CI [1.69e-03, 0.02]                                                                                               | beta = 6.04, 95% CI [1.77, 10.32], t(1709) = 2.77, p < .01; Std. beta = 0.27, 95% CI [0.08, 0.47]    | F(1, 1534) = 10.77, p = 0.001; Eta2 (partial) = 6.97e-03, 90% CI [1.74e-03, 0.02]                                                                                               | beta = 6.14, 95% CI [1.88, 10.39], t(1687) = 2.83, p < .01; Std. beta = 0.28, 95% CI [0.09, 0.47]       | F(1, 1533) = 10.61, p = 0.001; Eta2 (partial) = 6.87e-03, 90% CI [1.69e-03, 0.02]                                                                                               | beta = 5.98, 95% CI [1.69, 10.28], t(1706) = 2.73, p < .01; Std. beta = 0.27, 95% CI [0.08, 0.47]    |
|                                        | Both vs Neither   | F(1, 1578) = 2.84, p = 0.092; Eta2 = 1.80e-03, 90% CI [0.00, 6.98e-03]                                                                                                          | beta = 3.74, 95% CI [-0.66, 8.14], t(1773) = 1.67, p = 0.096; Std. beta = 0.17, 95% CI [-0.03, 0.37] | F(1, 1569) = 2.85, p = 0.091; Eta2 (partial) = 1.82e-03, 90% CI [0.00, 7.04e-03]                                                                                                | beta = 2.63, 95% CI [-1.98, 7.24], t(1764) = 1.12, p = 0.263; Std. beta = 0.12, 95% CI [-0.09, 0.33] | F(1, 1521) = 3.01, p = 0.083; Eta2 (partial) = 1.98e-03, 90% CI [0.00, 7.46e-03]                                                                                                | beta = 3.46, 95% CI [-1.25, 8.18], t(1709) = 1.44, p = 0.150; Std. beta = 0.16, 95% CI [-0.06, 0.37] | F(1, 1514) = 3.37, p = 0.066; Eta2 (partial) = 2.22e-03, 90% CI [0.00, 7.95e-03]                                                                                                | beta = 3.77, 95% CI [-1.03, 8.57], t(1687) = 1.54, p = 0.123; Std. beta = 0.17, 95% CI [-0.05, 0.39]    | F(1, 1519) = 3.05, p = 0.081; Eta2 (partial) = 2.00e-03, 90% CI [0.00, 7.51e-03]                                                                                                | beta = 3.46, 95% CI [-1.26, 8.18], t(1706) = 1.44, p = 0.150; Std. beta = 0.16, 95% CI [-0.06, 0.37] |

| Outcome             | Groups            | Full dataset (n=1777)                                                      |                                                                                                         |                                                                                      |                                                                                                         |                                                                                  |                                                                                                         | Sensitivity Checks                                                               |                                                                                                         |                                                                                  |                                                                                                         |                                        |                   |
|---------------------|-------------------|----------------------------------------------------------------------------|---------------------------------------------------------------------------------------------------------|--------------------------------------------------------------------------------------|---------------------------------------------------------------------------------------------------------|----------------------------------------------------------------------------------|---------------------------------------------------------------------------------------------------------|----------------------------------------------------------------------------------|---------------------------------------------------------------------------------------------------------|----------------------------------------------------------------------------------|---------------------------------------------------------------------------------------------------------|----------------------------------------|-------------------|
|                     |                   | Uncorrected                                                                |                                                                                                         | Corrected for demographics                                                           |                                                                                                         | Corrected for all covariates                                                     |                                                                                                         | Corrected for all covariates                                                     |                                                                                                         | Excluding non-lipophilic (n=1755)                                                |                                                                                                         | Excluding small gender groups (n=1772) |                   |
|                     |                   | ANCOVA                                                                     | Linear regression                                                                                       | ANCOVA                                                                               | Linear regression                                                                                       | ANCOVA                                                                           | Linear regression                                                                                       | ANCOVA                                                                           | Linear regression                                                                                       | ANCOVA                                                                           | Linear regression                                                                                       | ANCOVA                                 | Linear regression |
| Misses – Two back   | All groups        | F(3, 1773) = 2.43, p = 0.064; Eta2 = 4.09e-03, 90% CI [0.00, 9.11e-03]     | N/A                                                                                                     | F(3, 1764) = 2.43, p = 0.063; Eta2 (partial) = 4.12e-03, 90% CI [0.00, 9.18e-03]     | N/A                                                                                                     | F(3, 1709) = 2.56, p = 0.053; Eta2 (partial) = 4.48e-03, 90% CI [0.00, 9.83e-03] | N/A                                                                                                     | F(3, 1687) = 2.86, p = 0.036; Eta2 (partial) = 5.06e-03, 90% CI [1.74e-04, 0.01] | N/A                                                                                                     | F(3, 1706) = 2.63, p = 0.048; Eta2 (partial) = 4.61e-03, 90% CI [1.56e-05, 0.01] | N/A                                                                                                     |                                        |                   |
|                     | Statin vs Neither | F(1, 1553) = 0.02, p = 0.881; Eta2 = 1.44e-05, 90% CI [0.00, 1.12e-03]     | beta = 0.44, 95% CI [-5.38, 6.26], t(1773) = 0.15, p = 0.882; Std. beta = 0.02, 95% CI [-0.21, 0.25]    | F(1, 1544) = 0.02, p = 0.881; Eta2 (partial) = 1.46e-05, 90% CI [0.00, 1.17e-03]     | beta = 1.34, 95% CI [-4.66, 7.35], t(1764) = 0.44, p = 0.661; Std. beta = 0.05, 95% CI [-0.18, 0.29]    | F(1, 1494) = 0.17, p = 0.684; Eta2 (partial) = 1.11e-04, 90% CI [0.00, 2.60e-03] | beta = 1.75, 95% CI [-4.37, 7.88], t(1709) = 0.56, p = 0.575; Std. beta = 0.07, 95% CI [-0.17, 0.31]    | F(1, 1477) = 0.18, p = 0.672; Eta2 (partial) = 1.21e-04, 90% CI [0.00, 2.72e-04] | beta = 2.14, 95% CI [-4.66, 8.94], t(1687) = 0.62, p = 0.537; Std. beta = 0.08, 95% CI [-0.18, 0.35]    | F(1, 1492) = 0.18, p = 0.669; Eta2 (partial) = 1.22e-04, 90% CI [0.00, 2.68e-03] | beta = 1.77, 95% CI [-4.36, 7.90], t(1706) = 0.57, p = 0.571; Std. beta = 0.07, 95% CI [-0.17, 0.31]    |                                        |                   |
|                     | BP vs Neither     | F(1, 1596) = 1.78, p = 0.183; Eta2 = 1.11e-03, 90% CI [0.00, 5.53e-03]     | beta = -3.20, 95% CI [-7.93, 1.52], t(1773) = -1.33, p = 0.184; Std. beta = -0.13, 95% CI [-0.31, 0.06] | F(1, 1587) = 1.78, p = 0.182; Eta2 (partial) = 1.12e-03, 90% CI [0.00, 5.56e-03]     | beta = -2.56, 95% CI [-7.40, 2.27], t(1764) = -1.04, p = 0.298; Std. beta = -0.10, 95% CI [-0.29, 0.09] | F(1, 1536) = 1.56, p = 0.212; Eta2 (partial) = 1.01e-03, 90% CI [0.00, 5.42e-03] | beta = -2.68, 95% CI [-7.61, 2.25], t(1709) = -1.07, p = 0.287; Std. beta = -0.11, 95% CI [-0.30, 0.09] | F(1, 1534) = 1.56, p = 0.212; Eta2 (partial) = 1.01e-03, 90% CI [0.00, 5.42e-03] | beta = -2.68, 95% CI [-7.60, 2.25], t(1687) = -1.07, p = 0.287; Std. beta = -0.11, 95% CI [-0.30, 0.09] | F(1, 1533) = 1.64, p = 0.201; Eta2 (partial) = 1.07e-03, 90% CI [0.00, 5.55e-03] | beta = -2.63, 95% CI [-7.58, 2.32], t(1706) = -1.04, p = 0.298; Std. beta = -0.10, 95% CI [-0.30, 0.09] |                                        |                   |
|                     | Both vs Neither   | F(1, 1578) = 5.15, p = 0.023; Eta2 = 3.25e-03, 90% CI [2.30e-04, 9.62e-03] | beta = 5.84, 95% CI [0.74, 10.93], t(1773) = 2.25, p < .05; Std. beta = 0.23, 95% CI [0.03, 0.43]       | F(1, 1569) = 5.17, p = 0.023; Eta2 (partial) = 3.29e-03, 90% CI [2.35e-04, 9.70e-03] | beta = 6.96, 95% CI [1.62, 12.30], t(1764) = 2.55, p < .05; Std. beta = 0.27, 95% CI [0.06, 0.48]       | F(1, 1521) = 5.67, p = 0.017; Eta2 (partial) = 3.72e-03, 90% CI [3.46e-04, 0.01] | beta = 7.25, 95% CI [1.81, 12.69], t(1709) = 2.62, p < .01; Std. beta = 0.29, 95% CI [0.07, 0.50]       | F(1, 1514) = 6.53, p = 0.011; Eta2 (partial) = 4.30e-03, 90% CI [5.42e-04, 0.01] | beta = 7.91, 95% CI [2.35, 13.46], t(1687) = 2.79, p < .01; Std. beta = 0.31, 95% CI [0.09, 0.53]       | F(1, 1519) = 5.78, p = 0.016; Eta2 (partial) = 3.79e-03, 90% CI [3.70e-04, 0.01] | beta = 7.26, 95% CI [1.82, 12.70], t(1706) = 2.62, p < .01; Std. beta = 0.29, 95% CI [0.07, 0.50]       |                                        |                   |
| Misses – Three back | All groups        | F(3, 1773) = 0.22, p = 0.879; Eta2 = 3.80e-04, 90% CI [0.00, 1.14e-03]     | N/A                                                                                                     | F(3, 1764) = 0.22, p = 0.880; Eta2 (partial) = 3.81e-04, 90% CI [0.00, 8.54e-04]     | N/A                                                                                                     | F(3, 1709) = 0.16, p = 0.925; Eta2 (partial) = 2.77e-04, 90% CI [0.00, 5.28e-04] | N/A                                                                                                     | F(3, 1687) = 0.11, p = 0.953; Eta2 (partial) = 2.00e-04, 90% CI [0.00, 0.00]     | N/A                                                                                                     | F(3, 1706) = 0.17, p = 0.918; Eta2 (partial) = 2.95e-04, 90% CI [0.00, 6.41e-04] | N/A                                                                                                     |                                        |                   |
|                     | Statin vs Neither | F(1, 1553) = 0.54, p = 0.462; Eta2 = 3.49e-04, 90% CI [0.00, 3.61e-03]     | beta = -2.21, 95% CI [-8.17, 3.75], t(1773) = -0.73, p = 0.467; Std. beta = -0.09, 95% CI [-0.31, 0.14] | F(1, 1544) = 0.54, p = 0.463; Eta2 (partial) = 3.49e-04, 90% CI [0.00, 3.63e-03]     | beta = -2.17, 95% CI [-8.34, 4.00], t(1764) = -0.69, p = 0.490; Std. beta = -0.08, 95% CI [-0.32, 0.15] | F(1, 1494) = 0.23, p = 0.630; Eta2 (partial) = 1.56e-04, 90% CI [0.00, 2.88e-03] | beta = -1.76, 95% CI [-8.04, 4.52], t(1709) = -0.55, p = 0.582; Std. beta = -0.07, 95% CI [-0.31, 0.17] | F(1, 1477) = 0.01, p = 0.917; Eta2 (partial) = 7.41e-06, 90% CI [0.00, 6.93e-04] | beta = -0.73, 95% CI [-7.71, 6.25], t(1687) = -0.21, p = 0.837; Std. beta = -0.03, 95% CI [-0.30, 0.24] | F(1, 1492) = 0.23, p = 0.634; Eta2 (partial) = 1.52e-04, 90% CI [0.00, 2.86e-03] | beta = -1.76, 95% CI [-8.05, 4.52], t(1706) = -0.55, p = 0.582; Std. beta = -0.07, 95% CI [-0.31, 0.17] |                                        |                   |
|                     | BP vs Neither     | F(1, 1596) = 0.15, p = 0.695; Eta2 = 9.63e-05, 90% CI [0.00, 2.38e-03]     | beta = -0.96, 95% CI [-5.80, 3.88], t(1773) = -0.39, p = 0.697; Std. beta = -0.04, 95% CI [-0.22, 0.15] | F(1, 1587) = 0.15, p = 0.696; Eta2 (partial) = 9.64e-05, 90% CI [0.00, 2.16e-04]     | beta = -0.85, 95% CI [-5.82, 4.11], t(1764) = -0.34, p = 0.735; Std. beta = -0.03, 95% CI [-0.22, 0.16] | F(1, 1536) = 0.19, p = 0.659; Eta2 (partial) = 1.27e-04, 90% CI [0.00, 2.66e-03] | beta = -1.15, 95% CI [-6.21, 3.90], t(1709) = -0.45, p = 0.654; Std. beta = -0.04, 95% CI [-0.24, 0.15] | F(1, 1534) = 0.19, p = 0.662; Eta2 (partial) = 1.25e-04, 90% CI [0.00, 2.65e-03] | beta = -1.21, 95% CI [-6.27, 3.85], t(1687) = -0.47, p = 0.639; Std. beta = -0.05, 95% CI [-0.24, 0.15] | F(1, 1533) = 0.23, p = 0.633; Eta2 (partial) = 1.49e-04, 90% CI [0.00, 2.79e-03] | beta = -1.20, 95% CI [-6.28, 3.87], t(1706) = -0.47, p = 0.642; Std. beta = -0.05, 95% CI [-0.24, 0.15] |                                        |                   |
|                     | Both vs Neither   | F(1, 1578) = 8.61e-03, p =                                                 | beta = 0.24, 95% CI [-4.97, 5.46],                                                                      | F(1, 1569) = 8.58e-03, p =                                                           | beta = 0.47, 95% CI [-5.02, 5.96],                                                                      | F(1, 1521) = 0.05, p = 0.823;                                                    | beta = 0.81, 95% CI [-4.77, 6.38],                                                                      | F(1, 1514) = 0.12, p = 0.731;                                                    | beta = 1.17, 95% CI [-4.53, 6.88],                                                                      | F(1, 1519) = 0.05, p = 0.818;                                                    | beta = 0.81, 95% CI [-4.77, 6.39],                                                                      |                                        |                   |



| Outcome | Groups            | Full dataset (n=1777)                                                      |                                                                                                          |                                                                                      |                                                                                                                 |                                                                                      |                                                                                                                 | Sensitivity Checks                                                                   |                                                                                                                 |                                                                                      |                                                                                                                 |
|---------|-------------------|----------------------------------------------------------------------------|----------------------------------------------------------------------------------------------------------|--------------------------------------------------------------------------------------|-----------------------------------------------------------------------------------------------------------------|--------------------------------------------------------------------------------------|-----------------------------------------------------------------------------------------------------------------|--------------------------------------------------------------------------------------|-----------------------------------------------------------------------------------------------------------------|--------------------------------------------------------------------------------------|-----------------------------------------------------------------------------------------------------------------|
|         |                   | Uncorrected                                                                |                                                                                                          | Corrected for demographics                                                           |                                                                                                                 | Corrected for all covariates                                                         |                                                                                                                 | Excluding non-lipophilic (n=1755)                                                    |                                                                                                                 | Excluding small gender groups (n=1772)                                               |                                                                                                                 |
|         |                   | ANCOVA                                                                     | Linear regression                                                                                        | ANCOVA                                                                               | Linear regression                                                                                               | ANCOVA                                                                               | Linear regression                                                                                               | ANCOVA                                                                               | Linear regression                                                                                               | ANCOVA                                                                               | Linear regression                                                                                               |
|         |                   | 0.926; Eta2 = 5.45e-06, 90% CI [0.00, 4.96e-04]                            | t(1773) = 0.09, p = 0.927; Std. beta = 9.43e-03, 95% CI [-0.19, 0.21]                                    | 0.926; Eta2 (partial) = 5.47e-06, 90% CI [0.00, 4.93e-04]                            | t(1764) = 0.17, p = 0.867; Std. beta = 0.02, 95% CI [-0.19, 0.23]                                               | Eta2 (partial) = 3.28e-05, 90% CI [0.00, 1.68e-03]                                   | t(1709) = 0.28, p = 0.777; Std. beta = 0.03, 95% CI [-0.18, 0.25]                                               | Eta2 (partial) = 7.84e-05, 90% CI [0.00, 2.35e-03]                                   | t(1687) = 0.40, p = 0.687; Std. beta = 0.05, 95% CI [-0.17, 0.26]                                               | Eta2 (partial) = 3.50e-05, 90% CI [0.00, 1.73e-03]                                   | t(1706) = 0.28, p = 0.776; Std. beta = 0.03, 95% CI [-0.18, 0.25]                                               |
| D-prime | All groups        | F(3, 1773) = 1.60, p = 0.189; Eta2 = 2.69e-03, 90% CI [0.00, 6.72e-03]     | N/A                                                                                                      | F(3, 1764) = 1.60, p = 0.187; Eta2 (partial) = 2.72e-03, 90% CI [0.00, 6.78e-03]     | N/A                                                                                                             | F(3, 1709) = 1.56, p = 0.197; Eta2 (partial) = 2.73e-03, 90% CI [0.00, 6.86e-03]     | N/A                                                                                                             | F(3, 1687) = 1.54, p = 0.202; Eta2 (partial) = 2.73e-03, 90% CI [0.00, 6.89e-03]     | N/A                                                                                                             | F(3, 1706) = 1.55, p = 0.200; Eta2 (partial) = 2.72e-03, 90% CI [0.00, 6.84e-03]     | N/A                                                                                                             |
|         | Statin vs Neither | F(1, 1553) = 0.01, p = 0.917; Eta2 = 7.00e-06, 90% CI [0.00, 6.53e-04]     | beta = 9.71e-03, 95% CI [-0.17, 0.19], t(1773) = 0.10, p = 0.917; Std. beta = 0.01, 95% CI [-0.22, 0.24] | F(1, 1544) = 0.01, p = 0.917; Eta2 (partial) = 7.08e-06, 90% CI [0.00, 6.62e-04]     | beta = 0.07, 95% CI [-0.11, 0.26], t(1764) = 0.76, p = 0.445; Std. beta = 0.09, 95% CI [-0.14, 0.33]            | F(1, 1494) = 1.47e-05, p = 0.997; Eta2 (partial) = 9.83e-09, 90% CI [0.00, 0.00]     | beta = 0.07, 95% CI [-0.12, 0.26], t(1709) = 0.74, p = 0.461; Std. beta = 0.09, 95% CI [-0.15, 0.33]            | F(1, 1477) = 0.02, p = 0.888; Eta2 (partial) = 1.33e-05, 90% CI [0.00, 1.09e-03]     | beta = 0.05, 95% CI [-0.16, 0.27], t(1687) = 0.49, p = 0.622; Std. beta = 0.07, 95% CI [-0.20, 0.34]            | F(1, 1492) = 4.47e-05, p = 0.995; Eta2 (partial) = 3.00e-08, 90% CI [0.00, 0.00]     | beta = 0.07, 95% CI [-0.12, 0.26], t(1706) = 0.74, p = 0.458; Std. beta = 0.09, 95% CI [-0.15, 0.33]            |
|         | BP vs Neither     | F(1, 1596) = 0.39, p = 0.531; Eta2 = 2.46e-04, 90% CI [0.00, 5.51e-04]     | beta = -0.05, 95% CI [-0.20, 0.10], t(1773) = 0.63, p = 0.528; Std. beta = -0.06, 95% CI [-0.25, 0.13]   | F(1, 1587) = 0.39, p = 0.530; Eta2 (partial) = 2.48e-04, 90% CI [0.00, 3.15e-03]     | beta = -4.28e-03, 95% CI [-0.16, 0.15], t(1764) = -0.06, p = 0.956; Std. beta = -5.39e-03, 95% CI [-0.20, 0.18] | F(1, 1536) = 0.52, p = 0.470; Eta2 (partial) = 3.40e-04, 90% CI [0.00, 3.61e-03]     | beta = -7.36e-03, 95% CI [-0.16, 0.15], t(1709) = -0.09, p = 0.925; Std. beta = -9.30e-03, 95% CI [-0.20, 0.19] | F(1, 1534) = 0.54, p = 0.462; Eta2 (partial) = 3.53e-04, 90% CI [0.00, 3.65e-03]     | beta = -7.79e-03, 95% CI [-0.16, 0.15], t(1687) = -0.10, p = 0.921; Std. beta = -9.85e-03, 95% CI [-0.20, 0.18] | F(1, 1533) = 0.44, p = 0.509; Eta2 (partial) = 2.84e-04, 90% CI [0.00, 3.41e-03]     | beta = -3.16e-03, 95% CI [-0.16, 0.15], t(1706) = -0.04, p = 0.968; Std. beta = -4.00e-03, 95% CI [-0.20, 0.19] |
|         | Both vs Neither   | F(1, 1578) = 4.55, p = 0.033; Eta2 = 2.88e-03, 90% CI [1.20e-04, 8.97e-03] | beta = -0.17, 95% CI [-0.33, -0.01], t(1773) = -2.12, p < .05; Std. beta = -0.22, 95% CI [-0.42, -0.02]  | F(1, 1569) = 4.59, p = 0.032; Eta2 (partial) = 2.91e-03, 90% CI [1.27e-04, 9.06e-03] | beta = -0.11, 95% CI [-0.28, 0.05], t(1764) = -1.34, p = 0.181; Std. beta = -0.14, 95% CI [-0.35, 0.07]         | F(1, 1521) = 4.40, p = 0.036; Eta2 (partial) = 2.88e-03, 90% CI [9.61e-05, 9.12e-03] | beta = -0.11, 95% CI [-0.28, 0.06], t(1709) = -1.30, p = 0.195; Std. beta = -0.14, 95% CI [-0.36, 0.07]         | F(1, 1514) = 4.33, p = 0.038; Eta2 (partial) = 2.85e-03, 90% CI [8.49e-05, 9.09e-03] | beta = -0.12, 95% CI [-0.29, 0.06], t(1687) = -1.31, p = 0.191; Std. beta = -0.15, 95% CI [-0.37, 0.07]         | F(1, 1519) = 4.44, p = 0.035; Eta2 (partial) = 2.92e-03, 90% CI [1.05e-04, 9.19e-03] | beta = -0.11, 95% CI [-0.28, 0.06], t(1706) = -1.30, p = 0.195; Std. beta = -0.14, 95% CI [-0.36, 0.07]         |
| Beta    | All groups        | F(3, 1773) = 0.93, p = 0.427; Eta2 = 1.56e-03, 90% CI [0.00, 4.52e-03]     | N/A                                                                                                      | F(3, 1764) = 0.93, p = 0.428; Eta2 (partial) = 1.57e-03, 90% CI [0.00, 4.54e-03]     | N/A                                                                                                             | F(3, 1709) = 1.21, p = 0.306; Eta2 (partial) = 2.11e-03, 90% CI [0.00, 5.70e-03]     | N/A                                                                                                             | F(3, 1687) = 1.50, p = 0.214; Eta2 (partial) = 2.65e-03, 90% CI [0.00, 6.74e-03]     | N/A                                                                                                             | F(3, 1706) = 1.18, p = 0.315; Eta2 (partial) = 2.07e-03, 90% CI [0.00, 5.61e-03]     | N/A                                                                                                             |
|         | Statin vs Neither | F(1, 1553) = 0.54, p = 0.462; Eta2 = 3.48e-04, 90% CI [0.00, 3.61e-03]     | beta = -0.11, 95% CI [-0.38, 0.17], t(1773) = -0.76, p = 0.448; Std. beta = -0.09, 95% CI [-0.32, 0.14]  | F(1, 1544) = 0.54, p = 0.462; Eta2 (partial) = 3.50e-04, 90% CI [0.00, 3.63e-03]     | beta = -0.09, 95% CI [-0.37, 0.20], t(1764) = -0.60, p = 0.550; Std. beta = -0.07, 95% CI [-0.31, 0.16]         | F(1, 1494) = 0.74, p = 0.390; Eta2 (partial) = 4.95e-04, 90% CI [0.00, 4.17e-03]     | beta = -0.08, 95% CI [-0.37, 0.20], t(1709) = -0.57, p = 0.566; Std. beta = -0.07, 95% CI [-0.31, 0.17]         | F(1, 1477) = 1.64, p = 0.201; Eta2 (partial) = 1.11e-03, 90% CI [0.00, 5.75e-03]     | beta = -0.17, 95% CI [-0.49, 0.15], t(1687) = -1.02, p = 0.309; Std. beta = -0.14, 95% CI [-0.41, 0.13]         | F(1, 1492) = 0.75, p = 0.387; Eta2 (partial) = 5.02e-04, 90% CI [0.00, 4.20e-03]     | beta = -0.08, 95% CI [-0.37, 0.20], t(1706) = -0.57, p = 0.568; Std. beta = -0.07, 95% CI [-0.31, 0.17]         |

| Outcome                         | Groups                 | Full dataset (n=1777)                                                                                                                                                            |                                                                                                         |                                                                                                                                                                              |                                                                                                         |                                                                                                                                                                                  |                                                                                                                 | Sensitivity Checks                                                                                                                                                               |                                                                                                         |                                                                                                                                                                                  |                                                                                                                 |
|---------------------------------|------------------------|----------------------------------------------------------------------------------------------------------------------------------------------------------------------------------|---------------------------------------------------------------------------------------------------------|------------------------------------------------------------------------------------------------------------------------------------------------------------------------------|---------------------------------------------------------------------------------------------------------|----------------------------------------------------------------------------------------------------------------------------------------------------------------------------------|-----------------------------------------------------------------------------------------------------------------|----------------------------------------------------------------------------------------------------------------------------------------------------------------------------------|---------------------------------------------------------------------------------------------------------|----------------------------------------------------------------------------------------------------------------------------------------------------------------------------------|-----------------------------------------------------------------------------------------------------------------|
|                                 |                        | Uncorrected                                                                                                                                                                      |                                                                                                         | Corrected for demographics                                                                                                                                                   |                                                                                                         | Corrected for all covariates                                                                                                                                                     |                                                                                                                 | Excluding non-lipophilic (n=1755)                                                                                                                                                |                                                                                                         | Excluding small gender groups (n=1772)                                                                                                                                           |                                                                                                                 |
|                                 |                        | ANCOVA                                                                                                                                                                           | Linear regression                                                                                       | ANCOVA                                                                                                                                                                       | Linear regression                                                                                       | ANCOVA                                                                                                                                                                           | Linear regression                                                                                               | ANCOVA                                                                                                                                                                           | Linear regression                                                                                       | ANCOVA                                                                                                                                                                           | Linear regression                                                                                               |
|                                 | <b>BP vs Neither</b>   | F(1, 1596) = 2.13, p = 0.145; Eta2 = 1.33e-03, 90% CI [0.00, 6.00e-03]                                                                                                           | beta = -0.17, 95% CI [-0.39, 0.05], t(1773) = -1.50, p = 0.135; Std. beta = -0.14, 95% CI [-0.33, 0.04] | F(1, 1587) = 2.13, p = 0.145; Eta2 (partial) = 1.34e-03, 90% CI [0.00, 6.03e-03]                                                                                             | beta = -0.13, 95% CI [-0.36, 0.10], t(1764) = -1.14, p = 0.255; Std. beta = -0.11, 95% CI [-0.30, 0.08] | F(1, 1536) = 2.80, p = 0.094; Eta2 (partial) = 1.82e-03, 90% CI [0.00, 7.12e-03]                                                                                                 | beta = -0.14, 95% CI [-0.37, 0.10], t(1709) = -1.15, p = 0.252; Std. beta = -0.11, 95% CI [-0.31, 0.08]         | F(1, 1534) = 2.81, p = 0.094; Eta2 (partial) = 1.83e-03, 90% CI [0.00, 7.14e-03]                                                                                                 | beta = -0.13, 95% CI [-0.36, 0.10], t(1687) = -1.12, p = 0.262; Std. beta = -0.11, 95% CI [-0.31, 0.08] | F(1, 1533) = 2.71, p = 0.100; Eta2 (partial) = 1.77e-03, 90% CI [0.00, 7.02e-03]                                                                                                 | beta = -0.13, 95% CI [-0.37, 0.10], t(1706) = -1.13, p = 0.259; Std. beta = -0.11, 95% CI [-0.31, 0.08]         |
|                                 | <b>Both vs Neither</b> | F(1, 1578) = 0.18, p = 0.670; Eta2 = 1.15e-04, 90% CI [0.00, 2.53e-03]                                                                                                           | beta = -0.05, 95% CI [-0.29, 0.19], t(1773) = -0.44, p = 0.662; Std. beta = -0.04, 95% CI [-0.25, 0.16] | F(1, 1569) = 0.18, p = 0.670; Eta2 (partial) = 1.16e-04, 90% CI [0.00, 2.55e-03]                                                                                             | beta = -0.03, 95% CI [-0.28, 0.22], t(1764) = -0.24, p = 0.813; Std. beta = -0.03, 95% CI [-0.24, 0.19] | F(1, 1521) = 0.13, p = 0.714; Eta2 (partial) = 8.81e-05, 90% CI [0.00, 2.39e-03]                                                                                                 | beta = -2.95e-03, 95% CI [-0.26, 0.25], t(1709) = -0.02, p = 0.982; Std. beta = -2.47e-03, 95% CI [-0.22, 0.21] | F(1, 1514) = 0.01, p = 0.910; Eta2 (partial) = 8.43e-06, 90% CI [0.00, 1.89e-05]                                                                                                 | beta = 0.04, 95% CI [-0.22, 0.30], t(1687) = 0.28, p = 0.779; Std. beta = 0.03, 95% CI [-0.19, 0.25]    | F(1, 1519) = 0.14, p = 0.709; Eta2 (partial) = 9.14e-05, 90% CI [0.00, 2.42e-03]                                                                                                 | beta = -2.76e-03, 95% CI [-0.26, 0.25], t(1706) = -0.02, p = 0.983; Std. beta = -2.32e-03, 95% CI [-0.22, 0.21] |
| <b>RT – All test conditions</b> | <b>All groups</b>      | Group: F(3) = 5.39, p = 0.001; Eta2 (partial) = 9.03e-03, 90% CI [2.30e-03, 0.02]<br><br>Interaction: F(9) = 1.18, p = 0.304; Eta2 (partial) = 1.99e-03, 90% CI [0.00, 2.63e-03] | N/A                                                                                                     | Group: F(3) = 0.08, p = 0.971; Eta2 (partial) = 1.35e-04, 90% CI [0.00, 0.00]<br><br>Interaction: F(9) = 1.18, p = 0.304; Eta2 (partial) = 1.99e-03, 90% CI [0.00, 3.87e-03] | N/A                                                                                                     | Group: F(3) = 0.23, p = 0.875; Eta2 (partial) = 4.06e-04, 90% CI [0.00, 1.24e-03]<br><br>Interaction: F(9) = 1.00, p = 0.434; Eta2 (partial) = 1.74e-03, 90% CI [0.00, 2.20e-03] | N/A                                                                                                             | Group: F(3) = 0.30, p = 0.827; Eta2 (partial) = 5.30e-04, 90% CI [0.00, 1.19e-03]<br><br>Interaction: F(9) = 0.96, p = 0.473; Eta2 (partial) = 1.68e-03, 90% CI [0.00, 2.09e-03] | N/A                                                                                                     | Group: F(3) = 0.24, p = 0.868; Eta2 (partial) = 4.22e-04, 90% CI [0.00, 1.31e-03]<br><br>Interaction: F(9) = 1.03, p = 0.415; Eta2 (partial) = 1.78e-03, 90% CI [0.00, 2.28e-03] | N/A                                                                                                             |

## Predicting long-term outcomes

| Outcome         | Predictor            | Full dataset                                                                                                |                                                                                                          |                                                                                                             | Sensitivity Checks                                                                                          |                                                                                                             |
|-----------------|----------------------|-------------------------------------------------------------------------------------------------------------|----------------------------------------------------------------------------------------------------------|-------------------------------------------------------------------------------------------------------------|-------------------------------------------------------------------------------------------------------------|-------------------------------------------------------------------------------------------------------------|
|                 |                      | Uncorrected                                                                                                 | Corrected for demographics                                                                               | Corrected for all covariates                                                                                | Excluding non-lipophilic                                                                                    | Excluding small gender groups                                                                               |
|                 |                      |                                                                                                             |                                                                                                          |                                                                                                             | Corrected for all covariates                                                                                |                                                                                                             |
| Total CESD – T2 | Statin vs Neither    | beta = -3.95, 95% CI [-6.75, -1.15], t(1919) = -2.77, p < .01; Std. beta = -0.32, 95% CI [-0.55, -0.09]     | beta = 0.46, 95% CI [-2.27, 3.19], t(1910) = 0.33, p = 0.741; Std. beta = 0.04, 95% CI [-0.18, 0.26]     | beta = 0.42, 95% CI [-1.11, 1.94], t(1893) = 0.54, p = 0.592; Std. beta = 0.03, 95% CI [-0.09, 0.16]        | beta = -0.41, 95% CI [-2.09, 1.27], t(1871) = -0.48, p = 0.634; Std. beta = -0.03, 95% CI [-0.17, 0.10]     | beta = 0.42, 95% CI [-1.11, 1.94], t(1890) = 0.54, p = 0.593; Std. beta = 0.03, 95% CI [-0.09, 0.16]        |
|                 | BP vs Neither        | beta = -1.70, 95% CI [-3.99, 0.58], t(1919) = -1.46, p = 0.144; Std. beta = -0.14, 95% CI [-0.33, 0.05]     | beta = 1.36, 95% CI [-0.86, 3.58], t(1910) = 1.20, p = 0.231; Std. beta = 0.11, 95% CI [-0.07, 0.29]     | beta = 0.04, 95% CI [-1.19, 1.28], t(1893) = 0.07, p = 0.943; Std. beta = 3.66e-03, 95% CI [-0.10, 0.10]    | beta = 0.04, 95% CI [-1.19, 1.27], t(1871) = 0.07, p = 0.945; Std. beta = 3.51e-03, 95% CI [-0.10, 0.10]    | beta = 0.03, 95% CI [-1.21, 1.27], t(1890) = 0.05, p = 0.963; Std. beta = 2.38e-03, 95% CI [-0.10, 0.10]    |
|                 | Both vs Neither      | beta = -2.04, 95% CI [-4.44, 0.35], t(1919) = -1.67, p = 0.095; Std. beta = -0.17, 95% CI [-0.36, 0.03]     | beta = 2.85, 95% CI [0.47, 5.24], t(1910) = 2.35, p < .05; Std. beta = 0.23, 95% CI [0.04, 0.43]         | beta = 0.54, 95% CI [-0.79, 1.28], t(1893) = 0.80, p = 0.425; Std. beta = 0.04, 95% CI [-0.06, 0.15]        | beta = 0.57, 95% CI [-0.79, 1.94], t(1871) = 0.83, p = 0.409; Std. beta = 0.05, 95% CI [-0.06, 0.16]        | beta = 0.55, 95% CI [-0.79, 1.88], t(1890) = 0.80, p = 0.425; Std. beta = 0.04, 95% CI [-0.06, 0.15]        |
|                 | UBHR – angry faces   | beta = 3.93, 95% CI [-0.20, 8.06], t(1894) = 1.87, p = 0.062; Std. beta = 0.04, 95% CI [-2.25e-03, 0.09]    | beta = 0.65, 95% CI [-3.31, 4.60], t(1885) = 0.32, p = 0.749; Std. beta = 7.24e-03, 95% CI [-0.04, 0.05] | beta = 0.39, 95% CI [-1.80, 2.59], t(1868) = 0.35, p = 0.727; Std. beta = 4.37e-03, 95% CI [-0.02, 0.03]    | beta = 0.42, 95% CI [-1.79, 2.63], t(1846) = 0.37, p = 0.710; Std. beta = 4.67e-03, 95% CI [-0.02, 0.03]    | beta = 0.39, 95% CI [-1.81, 2.59], t(1865) = 0.35, p = 0.728; Std. beta = 4.37e-03, 95% CI [-0.02, 0.03]    |
|                 | UBHR – fearful faces | beta = 3.47, 95% CI [-0.30, 7.25], t(1894) = 1.80, p = 0.072; Std. beta = 0.04, 95% CI [-3.74e-03, 0.09]    | beta = 2.68, 95% CI [-0.92, 6.27], t(1885) = 1.46, p = 0.144; Std. beta = 0.03, 95% CI [-0.01, 0.08]     | beta = 1.07, 95% CI [-0.92, 3.06], t(1868) = 1.05, p = 0.293; Std. beta = 0.01, 95% CI [-0.01, 0.04]        | beta = 1.01, 95% CI [-1.01, 3.02], t(1846) = 0.98, p = 0.328; Std. beta = 0.01, 95% CI [-0.01, 0.04]        | beta = 1.10, 95% CI [-0.90, 3.09], t(1865) = 1.08, p = 0.280; Std. beta = 0.01, 95% CI [-0.01, 0.04]        |
| Total CESD – T3 | Statin vs Neither    | beta = -2.90, 95% CI [-5.83, 0.02], t(1827) = -1.94, p = 0.052; Std. beta = -0.23, 95% CI [-0.46, 1.94e-03] | beta = 1.45, 95% CI [-1.43, 4.32], t(1818) = 0.99, p = 0.325; Std. beta = 0.11, 95% CI [-0.11, 0.34]     | beta = 1.01, 95% CI [-0.82, 2.85], t(1762) = 1.08, p = 0.280; Std. beta = 0.08, 95% CI [-0.07, 0.23]        | beta = 0.87, 95% CI [-1.19, 2.93], t(1740) = 0.83, p = 0.407; Std. beta = 0.07, 95% CI [-0.09, 0.23]        | beta = 1.02, 95% CI [-0.82, 2.86], t(1759) = 1.09, p = 0.275; Std. beta = 0.08, 95% CI [-0.07, 0.23]        |
|                 | BP vs Neither        | beta = -0.69, 95% CI [-3.04, 1.65], t(1827) = -0.58, p = 0.563; Std. beta = -0.05, 95% CI [-0.24, 0.13]     | beta = 2.14, 95% CI [-0.15, 4.42], t(1818) = 1.83, p = 0.067; Std. beta = 0.17, 95% CI [-0.01, 0.35]     | beta = 0.36, 95% CI [-1.10, 1.82], t(1762) = 0.48, p = 0.631; Std. beta = 0.03, 95% CI [-0.09, 0.15]        | beta = 0.37, 95% CI [-1.10, 1.84], t(1740) = 0.50, p = 0.620; Std. beta = 0.03, 95% CI [-0.09, 0.15]        | beta = 0.40, 95% CI [-1.07, 1.87], t(1759) = 0.54, p = 0.590; Std. beta = 0.03, 95% CI [-0.08, 0.15]        |
|                 | Both vs Neither      | beta = -1.83, 95% CI [-4.31, 0.66], t(1827) = -1.44, p = 0.149; Std. beta = -0.14, 95% CI [-0.34, 0.05]     | beta = 2.76, 95% CI [0.28, 5.25], t(1818) = 2.18, p < .05; Std. beta = 0.22, 95% CI [0.02, 0.42]         | beta = 0.36, 95% CI [-1.22, 1.95], t(1762) = 0.45, p = 0.652; Std. beta = 0.03, 95% CI [-0.10, 0.16]        | beta = 0.30, 95% CI [-1.32, 1.92], t(1740) = 0.36, p = 0.719; Std. beta = 0.02, 95% CI [-0.11, 0.15]        | beta = 0.38, 95% CI [-1.21, 1.96], t(1759) = 0.47, p = 0.640; Std. beta = 0.03, 95% CI [-0.10, 0.16]        |
|                 | UBHR – angry faces   | beta = 5.01, 95% CI [0.70, 9.32], t(1802) = 2.28, p < .05; Std. beta = 0.06, 95% CI [7.74e-03, 0.10]        | beta = 1.96, 95% CI [-2.20, 6.12], t(1793) = 0.92, p = 0.356; Std. beta = 0.02, 95% CI [-0.02, 0.07]     | beta = 1.52, 95% CI [-1.13, 4.16], t(1762) = 1.13, p = 0.261; Std. beta = 0.02, 95% CI [-0.01, 0.05]        | beta = 1.70, 95% CI [-0.97, 4.37], t(1718) = 1.25, p = 0.211; Std. beta = 0.02, 95% CI [-0.01, 0.05]        | beta = 1.48, 95% CI [-1.16, 4.13], t(1737) = 1.10, p = 0.271; Std. beta = 0.02, 95% CI [-0.01, 0.05]        |
|                 | UBHR – fearful faces | beta = 0.90, 95% CI [-3.11, 4.92], t(1802) = 0.44, p = 0.659; Std. beta = 0.01, 95% CI [-0.04, 0.06]        | beta = 0.12, 95% CI [-3.74, 3.97], t(1793) = 0.06, p = 0.952; Std. beta = 1.40e-03, 95% CI [-0.04, 0.05] | beta = -0.57, 95% CI [-3.00, 1.87], t(1740) = -0.46, p = 0.649; Std. beta = -6.74e-03, 95% CI [-0.04, 0.02] | beta = -0.66, 95% CI [-3.13, 1.82], t(1718) = -0.52, p = 0.602; Std. beta = -7.75e-03, 95% CI [-0.04, 0.02] | beta = -0.53, 95% CI [-2.97, 1.90], t(1737) = -0.43, p = 0.669; Std. beta = -6.33e-03, 95% CI [-0.04, 0.02] |

| Outcome                          | Predictor                   | Full dataset                                                                                            |                                                                                                          |                                                                                                                 | Sensitivity Checks                                                                                          |                                                                                                             |
|----------------------------------|-----------------------------|---------------------------------------------------------------------------------------------------------|----------------------------------------------------------------------------------------------------------|-----------------------------------------------------------------------------------------------------------------|-------------------------------------------------------------------------------------------------------------|-------------------------------------------------------------------------------------------------------------|
|                                  |                             | Uncorrected                                                                                             | Corrected for demographics                                                                               | Corrected for all covariates                                                                                    | Excluding non-lipophilic                                                                                    | Excluding small gender groups                                                                               |
|                                  |                             |                                                                                                         |                                                                                                          |                                                                                                                 | Corrected for all covariates                                                                                |                                                                                                             |
| <b>Total CESD – T4</b>           | <b>Statin vs Neither</b>    | beta = -2.33, 95% CI [-5.33, 0.68], t(1703) = -1.52, p = 0.130; Std. beta = -0.18, 95% CI [-0.42, 0.05] | beta = 2.37, 95% CI [-0.58, 5.32], t(1694) = 1.58, p = 0.115; Std. beta = 0.19, 95% CI [-0.05, 0.42]     | beta = 1.35, 95% CI [-0.79, 3.50], t(1625) = 1.24, p = 0.216; Std. beta = 0.11, 95% CI [-0.06, 0.28]            | beta = 1.72, 95% CI [-0.64, 4.09], t(1606) = 1.43, p = 0.154; Std. beta = 0.14, 95% CI [-0.05, 0.32]        | beta = 1.36, 95% CI [-0.78, 3.51], t(1622) = 1.25, p = 0.213; Std. beta = 0.11, 95% CI [-0.06, 0.28]        |
|                                  | <b>BP vs Neither</b>        | beta = -1.74, 95% CI [-4.15, 0.67], t(1703) = -1.42, p = 0.156; Std. beta = -0.14, 95% CI [-0.32, 0.05] | (beta = 1.40, 95% CI [-0.95, 3.75], t(1694) = 1.17, p = 0.243; Std. beta = 0.11, 95% CI [-0.07, 0.29])   | beta = -0.37, 95% CI [-2.09, 1.34], t(1625) = -0.43, p = 0.670; Std. beta = -0.03, 95% CI [-0.16, 0.11]         | beta = -0.34, 95% CI [-2.07, 1.38], t(1606) = -0.39, p = 0.696; Std. beta = -0.03, 95% CI [-0.16, 0.11]     | beta = -0.36, 95% CI [-2.09, 1.36], t(1622) = -0.41, p = 0.682; Std. beta = -0.03, 95% CI [-0.16, 0.11]     |
|                                  | <b>Both vs Neither</b>      | beta = -3.23, 95% CI [-5.83, -0.64], t(1703) = -2.45, p < .05; Std. beta = -0.25, 95% CI [-0.46, -0.05] | beta = 1.89, 95% CI [-0.70, 4.48], t(1694) = 1.43, p = 0.153; Std. beta = 0.15, 95% CI [-0.06, 0.35]     | beta = -0.29, 95% CI [-2.17, 1.59], t(1625) = -0.31, p = 0.758; Std. beta = -0.02, 95% CI [-0.17, 0.12]         | beta = -0.41, 95% CI [-2.34, 1.51], t(1606) = -0.42, p = 0.674; Std. beta = -0.03, 95% CI [-0.18, 0.12]     | beta = -0.29, 95% CI [-2.17, 1.59], t(1622) = -0.30, p = 0.763; Std. beta = -0.02, 95% CI [-0.17, 0.13]     |
|                                  | <b>UBHR – angry faces</b>   | beta = 7.68, 95% CI [3.09, 12.26], t(1681) = 3.28, p < .01; Std. beta = 0.08, 95% CI [0.03, 0.13]       | beta = 4.32, 95% CI [-0.08, 8.72], t(1672) = 1.92, p = 0.054; Std. beta = 0.05, 95% CI [-8.98e-04, 0.09] | beta = 3.61, 95% CI [0.42, 6.80], t(1606) = 2.22, p < .05; Std. beta = 0.04, 95% CI [4.55e-03, 0.07]            | beta = 3.71, 95% CI [0.49, 6.93], t(1587) = 2.26, p < .05; Std. beta = 0.04, 95% CI [5.23e-03, 0.07]        | beta = 3.57, 95% CI [0.38, 6.76], t(1603) = 2.19, p < .05; Std. beta = 0.04, 95% CI [4.08e-03, 0.07]        |
|                                  | <b>UBHR – fearful faces</b> | beta = 1.25, 95% CI [-2.98, 5.47], t(1681) = 0.58, p = 0.563; Std. beta = 0.01, 95% CI [-0.03, 0.06]    | beta = 0.18, 95% CI [-3.86, 4.21], t(1672) = 0.09, p = 0.932; Std. beta = 2.06e-03, 95% CI [-0.05, 0.05] | beta = -0.03, 95% CI [-2.93, 2.88], t(1606) = -0.02, p = 0.985; Std. beta = -3.23e-04, 95% CI [-0.03, 0.03]     | beta = -0.29, 95% CI [-3.24, 2.65], t(1587) = -0.20, p = 0.845; Std. beta = -3.42e-03, 95% CI [-0.04, 0.03] | beta = 0.08, 95% CI [-2.83, 2.99], t(1603) = 0.06, p = 0.956; Std. beta = 9.68e-04, 95% CI [-0.03, 0.04]    |
| <b>Change in CESD – BL to T2</b> | <b>Statin vs Neither</b>    | beta = 0.62, 95% CI [-0.90, 2.14], t(1916) = 0.80, p = 0.423; Std. beta = 0.09, 95% CI [-0.14, 0.32]    | beta = 0.50, 95% CI [-1.06, 2.07], t(1907) = 0.63, p = 0.528; Std. beta = 0.08, 95% CI [-0.16, 0.31]     | beta = 0.37, 95% CI [-1.15, 1.89], t(1898) = 0.48, p = 0.633; Std. beta = 0.06, 95% CI [-0.17, 0.28]            | beta = -0.44, 95% CI [-2.12, 1.25], t(1876) = -0.51, p = 0.610; Std. beta = -0.07, 95% CI [-0.32, 0.19]     | beta = 0.37, 95% CI [-1.15, 1.89], t(1895) = 0.48, p = 0.632; Std. beta = 0.06, 95% CI [-0.17, 0.28]        |
|                                  | <b>BP vs Neither</b>        | beta = -0.07, 95% CI [-1.31, 1.17], t(1916) = -0.11, p = 0.913; Std. beta = -0.01, 95% CI [-0.20, 0.18] | beta = -0.15, 95% CI [-1.42, 1.12], t(1907) = -0.23, p = 0.820; Std. beta = -0.02, 95% CI [-0.21, 0.17]  | beta = -9.29e-03, 95% CI [-1.24, 1.22], t(1898) = -0.01, p = 0.988; Std. beta = -1.40e-03, 95% CI [-0.19, 0.18] | beta = -0.02, 95% CI [-1.24, 1.21], t(1876) = -0.03, p = 0.978; Std. beta = -2.63e-03, 95% CI [-0.19, 0.18] | beta = -0.02, 95% CI [-1.26, 1.21], t(1895) = -0.03, p = 0.973; Std. beta = -3.17e-03, 95% CI [-0.19, 0.18] |
|                                  | <b>Both vs Neither</b>      | beta = 0.48, 95% CI [-0.83, 1.79], t(1916) = 0.72, p = 0.471; Std. beta = 0.07, 95% CI [-0.12, 0.27]    | beta = 0.40, 95% CI [-0.97, 1.77], t(1907) = 0.57, p = 0.567; Std. beta = 0.06, 95% CI [-0.15, 0.27]     | beta = 0.50, 95% CI [-0.83, 1.84], t(1898) = 0.74, p = 0.460; Std. beta = 0.08, 95% CI [-0.13, 0.28]            | beta = 0.53, 95% CI [-0.83, 1.89], t(1876) = 0.76, p = 0.445; Std. beta = 0.08, 95% CI [-0.13, 0.29]        | beta = 0.50, 95% CI [-0.83, 1.84], t(1895) = 0.74, p = 0.459; Std. beta = 0.08, 95% CI [-0.13, 0.28]        |
|                                  | <b>UBHR – angry faces</b>   | beta = 7.68, 95% CI [3.09, 12.26], t(1681) = 3.28, p < .01; Std. beta = 0.08, 95% CI [0.03, 0.13]       | beta = 0.29, 95% CI [-1.98, 2.56], t(1882) = 0.25, p = 0.801; Std. beta = 6.02e-03, 95% CI [-0.04, 0.05] | beta = 0.39, 95% CI [-1.80, 2.59], t(1868) = 0.35, p = 0.727; Std. beta = 8.05e-03, 95% CI [-0.04, 0.05]        | beta = 0.42, 95% CI [-1.79, 2.63], t(1846) = 0.37, p = 0.710; Std. beta = 8.63e-03, 95% CI [-0.04, 0.05]    | beta = 0.39, 95% CI [-1.81, 2.59], t(1865) = 0.35, p = 0.728; Std. beta = 8.04e-03, 95% CI [-0.04, 0.05]    |
|                                  | <b>UBHR – fearful faces</b> | beta = 1.25, 95% CI [-2.98, 5.47], t(1681) = 0.58, p = 0.563; Std. beta = 0.01, 95% CI [-0.03, 0.06]    | beta = 0.87, 95% CI [-1.19, 2.93], t(1882) = 0.83, p = 0.409; Std. beta = 0.02, 95% CI [-0.03, 0.07]     | beta = 1.07, 95% CI [-0.92, 3.06], t(1868) = 1.05, p = 0.293; Std. beta = 0.02, 95% CI [-0.02, 0.07]            | beta = 1.01, 95% CI [-1.01, 3.02], t(1846) = 0.98, p = 0.328; Std. beta = 0.02, 95% CI [-0.02, 0.07]        | beta = 1.10, 95% CI [-0.90, 3.09], t(1865) = 1.08, p = 0.280; Std. beta = 0.02, 95% CI [-0.02, 0.07]        |
| <b>Change in CESD – BL to T3</b> | <b>Statin vs Neither</b>    | beta = 1.27, 95% CI [-0.55, 3.09], t(1827) = 1.37, p = 0.171; Std. beta = 0.16, 95% CI [-0.07, 0.39]    | beta = 1.07, 95% CI [-0.81, 2.94], t(1818) = 1.12, p = 0.264; Std. beta = 0.14, 95% CI [-0.10, 0.38]     | beta = 0.97, 95% CI [-0.87, 2.81], t(1767) = 1.03, p = 0.303; Std. beta = 0.12, 95% CI [-0.11, 0.36]            | beta = 0.85, 95% CI [-1.21, 2.91], t(1745) = 0.81, p = 0.417; Std. beta = 0.11, 95% CI [-0.15, 0.37]        | beta = 0.98, 95% CI [-0.86, 2.82], t(1764) = 1.04, p = 0.298; Std. beta = 0.13, 95% CI [-0.11, 0.36]        |
|                                  | <b>BP vs Neither</b>        | beta = 0.22, 95% CI [-1.24, 1.68], t(1827) = 0.30, p =                                                  | beta = 0.12, 95% CI [-1.37, 1.61], t(1818) = 0.16, p =                                                   | beta = 0.30, 95% CI [-1.16, 1.76], t(1767) = 0.40, p =                                                          | beta = 0.31, 95% CI [-1.16, 1.77], t(1745) = 0.41, p =                                                      | beta = 0.35, 95% CI [-1.11, 1.82], t(1764) = 0.47, p =                                                      |

| Outcome                          | Predictor                   | Full dataset                                                                                                |                                                                                                             |                                                                                                                  | Sensitivity Checks                                                                                          |                                                                                                              |
|----------------------------------|-----------------------------|-------------------------------------------------------------------------------------------------------------|-------------------------------------------------------------------------------------------------------------|------------------------------------------------------------------------------------------------------------------|-------------------------------------------------------------------------------------------------------------|--------------------------------------------------------------------------------------------------------------|
|                                  |                             | Uncorrected                                                                                                 | Corrected for demographics                                                                                  | Corrected for all covariates                                                                                     | Excluding non-lipophilic                                                                                    | Excluding small gender groups                                                                                |
|                                  |                             |                                                                                                             |                                                                                                             |                                                                                                                  | Corrected for all covariates                                                                                |                                                                                                              |
|                                  |                             | 0.765; Std. beta = 0.03, 95% CI [-0.16, 0.21]                                                               | 0.872; Std. beta = 0.02, 95% CI [-0.17, 0.21]                                                               | 0.687; Std. beta = 0.04, 95% CI [-0.15, 0.23]                                                                    | 0.679; Std. beta = 0.04, 95% CI [-0.15, 0.23]                                                               | 0.639; Std. beta = 0.04, 95% CI [-0.14, 0.23]                                                                |
|                                  | <b>Both vs Neither</b>      | beta = 0.32, 95% CI [-1.22, 1.87], t(1827) = 0.41, p = 0.682; Std. beta = 0.04, 95% CI [-0.16, 0.24]        | beta = 0.26, 95% CI [-1.36, 1.88], t(1818) = 0.31, p = 0.754; Std. beta = 0.03, 95% CI [-0.17, 0.24]        | beta = 0.25, 95% CI [-1.33, 1.83], t(1767) = 0.31, p = 0.756; Std. beta = 0.03, 95% CI [-0.17, 0.23]             | beta = 0.17, 95% CI [-1.45, 1.79], t(1745) = 0.20, p = 0.840; Std. beta = 0.02, 95% CI [-0.19, 0.23]        | beta = 0.26, 95% CI [-1.32, 1.85], t(1764) = 0.33, p = 0.744; Std. beta = 0.03, 95% CI [-0.17, 0.24]         |
|                                  | <b>UBHR – angry faces</b>   | beta = 0.81, 95% CI [-1.88, 3.50], t(1802) = 0.59, p = 0.554; Std. beta = 0.01, 95% CI [-0.03, 0.06]        | beta = 1.23, 95% CI [-1.48, 3.95], t(1793) = 0.89, p = 0.374; Std. beta = 0.02, 95% CI [-0.03, 0.07]        | beta = 1.52, 95% CI [-1.13, 4.16], t(1740) = 1.13, p = 0.261; Std. beta = 0.03, 95% CI [-0.02, 0.07]             | beta = 1.70, 95% CI [-0.97, 4.37], t(1718) = 1.25, p = 0.211; Std. beta = 0.03, 95% CI [-0.02, 0.08]        | beta = 1.48, 95% CI [-1.16, 4.13], t(1737) = 1.10, p = 0.271; Std. beta = 0.03, 95% CI [-0.02, 0.07]         |
|                                  | <b>UBHR – fearful faces</b> | beta = -0.78, 95% CI [-3.29, 1.73], t(1802) = -0.61, p = 0.543; Std. beta = -0.01, 95% CI [-0.06, 0.03]     | beta = -0.65, 95% CI [-3.17, 1.87], t(1793) = -0.51, p = 0.613; Std. beta = -0.01, 95% CI [-0.06, 0.04]     | beta = -0.57, 95% CI [-3.00, 1.82], t(1740) = -0.46, p = 0.649; Std. beta = -0.01, 95% CI [-0.06, 0.04]          | beta = -0.66, 95% CI [-3.13, 1.82], t(1718) = -0.52, p = 0.602; Std. beta = -0.01, 95% CI [-0.06, 0.03]     | beta = -0.53, 95% CI [-2.97, 1.90], t(1737) = -0.43, p = 0.669; Std. beta = -0.01, 95% CI [-0.06, 0.04]      |
| <b>Change in CESD – BL to T4</b> | <b>Statin vs Neither</b>    | beta = 1.44, 95% CI [-0.70, 3.57], t(1700) = 1.32, p = 0.187; Std. beta = 0.16, 95% CI [-0.08, 0.39]        | beta = 1.49, 95% CI [-0.72, 3.70], t(1691) = 1.33, p = 0.185; Std. beta = 0.16, 95% CI [-0.08, 0.41]        | beta = 1.32, 95% CI [-0.83, 3.47], t(1630) = 1.21, p = 0.228; Std. beta = 0.14, 95% CI [-0.09, 0.38]             | beta = 1.72, 95% CI [-0.65, 4.09], t(1611) = 1.42, p = 0.155; Std. beta = 0.19, 95% CI [-0.07, 0.45]        | beta = 1.33, 95% CI [-0.81, 3.48], t(1611) = 1.22, p = 0.224; Std. beta = 0.15, 95% CI [-0.09, 0.38]         |
|                                  | <b>BP vs Neither</b>        | beta = -0.74, 95% CI [-2.46, 0.98], t(1700) = -0.84, p = 0.399; Std. beta = -0.08, 95% CI [-0.27, 0.11]     | beta = -0.67, 95% CI [-2.43, 1.09], t(1691) = -0.74, p = 0.456; Std. beta = -0.07, 95% CI [-0.27, 0.12]     | beta = -0.49, 95% CI [-2.20, 1.22], t(1630) = -0.56, p = 0.576; Std. beta = -0.05, 95% CI [-0.24, 0.13]          | beta = -0.47, 95% CI [-2.18, 1.25], t(1611) = -0.53, p = 0.595; Std. beta = -0.05, 95% CI [-0.24, 0.14]     | beta = -0.47, 95% CI [-2.19, 1.25], t(1611) = -0.53, p = 0.592; Std. beta = -0.05, 95% CI [-0.24, 0.14]      |
|                                  | <b>Both vs Neither</b>      | beta = -0.72, 95% CI [-2.57, 1.13], t(1700) = -0.76, p = 0.448; Std. beta = -0.08, 95% CI [-0.28, 0.12]     | beta = -0.59, 95% CI [-2.54, 1.35], t(1691) = -0.60, p = 0.551; Std. beta = -0.07, 95% CI [-0.28, 0.15]     | beta = -0.37, 95% CI [-2.24, 1.51], t(1630) = -0.38, p = 0.702; Std. beta = -0.04, 95% CI [-0.25, 0.17]          | beta = -0.49, 95% CI [-2.41, 1.44], t(1611) = -0.50, p = 0.619; Std. beta = -0.05, 95% CI [-0.26, 0.16]     | beta = -0.36, 95% CI [-2.24, 1.52], t(1611) = -0.37, p = 0.709; Std. beta = -0.04, 95% CI [-0.25, 0.17]      |
|                                  | <b>UBHR – angry faces</b>   | beta = 3.60, 95% CI [0.32, 6.88], t(1678) = 2.15, p < .05; Std. beta = 0.05, 95% CI [4.83e-03, 0.10]        | beta = 3.71, 95% CI [0.40, 7.02], t(1669) = 2.20, p < .05; Std. beta = 0.06, 95% CI [6.05e-03, 0.11]        | beta = 3.61, 95% CI [0.42, 6.80], t(1606) = 2.22, p < .05; Std. beta = 0.05, 95% CI [6.33e-03, 0.10]             | beta = 3.71, 95% CI [0.49, 6.93], t(1587) = 2.26, p < .05; Std. beta = 0.06, 95% CI [7.29e-03, 0.10]        | beta = 3.57, 95% CI [0.38, 6.76], t(1603) = 2.19, p < .05; Std. beta = 0.05, 95% CI [5.68e-03, 0.10]         |
|                                  | <b>UBHR – fearful faces</b> | beta = -0.06, 95% CI [-3.08, 2.96], t(1678) = -0.04, p = 0.970; Std. beta = -9.56e-04, 95% CI [-0.05, 0.05] | beta = -0.06, 95% CI [-3.09, 2.97], t(1669) = -0.04, p = 0.969; Std. beta = -9.78e-04, 95% CI [-0.05, 0.05] | beta = -0.03, 95% CI [-2.93, 2.88], t(1606) = -0.02, p = 0.985; Std. beta = -4.49e-04, 95% CI [-0.05, 0.05]      | beta = -0.29, 95% CI [-3.24, 2.65], t(1587) = -0.20, p = 0.845; Std. beta = -4.77e-03, 95% CI [-0.05, 0.04] | beta = 0.08, 95% CI [-2.83, 2.99], t(1603) = 0.06, p = 0.956; Std. beta = 1.35e-03, 95% CI [-0.05, 0.05]     |
| <b>GAD-7 – T2</b>                | <b>Statin vs Neither</b>    | beta = -2.26, 95% CI [-3.42, -1.09], t(1919) = -3.80, p < .001; Std. beta = -0.44, 95% CI [-0.67, -0.21]    | beta = -0.48, 95% CI [-1.63, 0.66], t(1910) = -0.83, p = 0.407; Std. beta = -0.09, 95% CI [-0.32, 0.13]     | beta = -0.49, 95% CI [-1.30, 0.33], t(1893) = -1.17, p = 0.242; Std. beta = -0.09, 95% CI [-0.25, 0.06]          | beta = -0.73, 95% CI [-1.63, 0.17], t(1871) = -1.58, p = 0.114; Std. beta = -0.14, 95% CI [-0.32, 0.03]     | beta = -0.48, 95% CI [-1.30, 0.33], t(1871) = -1.16, p = 0.245; Std. beta = -0.09, 95% CI [-0.25, 0.06]      |
|                                  | <b>BP vs Neither</b>        | beta = -0.18, 95% CI [-1.13, 0.77], t(1919) = -0.37, p = 0.711; Std. beta = -0.04, 95% CI [-0.22, 0.15]     | beta = 1.03, 95% CI [0.10, 1.96], t(1910) = 2.17, p < .05; Std. beta = 0.20, 95% CI [0.02, 0.38]            | beta = 0.60, 95% CI [-0.06, 1.26], t(1893) = 1.78, p = 0.075; Std. beta = 0.12, 95% CI [-0.01, 0.25]             | beta = 0.59, 95% CI [-0.06, 1.25], t(1871) = 1.77, p = 0.077; Std. beta = 0.12, 95% CI [-0.01, 0.24]        | beta = 0.61, 95% CI [-0.05, 1.28], t(1890) = 1.82, p = 0.069; Std. beta = 0.12, 95% CI [-0.32e-03, 0.25]     |
|                                  | <b>Both vs Neither</b>      | beta = -1.17, 95% CI [-2.17, -0.17], t(1919) = -2.30, p < .05; Std. beta = -0.23, 95% CI [-0.42, -0.03]     | beta = 0.79, 95% CI [-0.22, 1.79], t(1910) = 1.54, p = 0.124; Std. beta = 0.15, 95% CI [-0.04, 0.35]        | beta = 1.37e-03, 95% CI [-0.71, 0.72], t(1893) = 3.76e-03, p = 0.997; Std. beta = 2.68e-04, 95% CI [-0.14, 0.14] | beta = -0.04, 95% CI [-0.77, 0.69], t(1871) = -0.12, p = 0.907; Std. beta = -8.52e-03, 95% CI [-0.15, 0.13] | beta = 3.84e-03, 95% CI [-0.71, 0.72], t(1890) = 0.01, p = 0.992; Std. beta = 7.50e-04, 95% CI [-0.14, 0.14] |

| Outcome           | Predictor                   | Full dataset                                                                                             |                                                                                                             |                                                                                                          | Sensitivity Checks                                                                                       |                                                                                                          |
|-------------------|-----------------------------|----------------------------------------------------------------------------------------------------------|-------------------------------------------------------------------------------------------------------------|----------------------------------------------------------------------------------------------------------|----------------------------------------------------------------------------------------------------------|----------------------------------------------------------------------------------------------------------|
|                   |                             | Uncorrected                                                                                              | Corrected for demographics                                                                                  | Corrected for all covariates                                                                             | Excluding non-lipophilic                                                                                 | Excluding small gender groups                                                                            |
|                   |                             |                                                                                                          |                                                                                                             |                                                                                                          | Corrected for all covariates                                                                             |                                                                                                          |
|                   | <b>UBHR – angry faces</b>   | beta = 1.93, 95% CI [0.21, 3.65], t(1894) = 2.20, p < .05; Std. beta = 0.05, 95% CI [5.60e-03, 0.10]     | beta = 0.59, 95% CI [-1.07, 2.25], t(1885) = 0.70, p = 0.487; Std. beta = 0.02, 95% CI [-0.03, 0.06]        | beta = 0.70, 95% CI [-0.36, 1.76], t(1868) = 1.30, p = 0.193; Std. beta = 0.02, 95% CI [-9.55e-03, 0.05] | beta = 0.66, 95% CI [-0.40, 1.73], t(1846) = 1.22, p = 0.223; Std. beta = 0.02, 95% CI [-0.01, 0.05]     | beta = 0.70, 95% CI [-0.36, 1.76], t(1865) = 1.29, p = 0.198; Std. beta = 0.02, 95% CI [-9.75e-03, 0.05] |
|                   | <b>UBHR – fearful faces</b> | beta = 1.15, 95% CI [-0.42, 2.72], t(1894) = 1.43, p = 0.152; Std. beta = 0.03, 95% CI [-0.01, 0.08]     | beta = 0.79, 95% CI [-0.72, 2.30], t(1885) = 1.02, p = 0.306; Std. beta = 0.02, 95% CI [-0.02, 0.07]        | beta = 0.67, 95% CI [-0.29, 1.63], t(1868) = 1.37, p = 0.171; Std. beta = 0.02, 95% CI [-8.54e-03, 0.05] | beta = 0.64, 95% CI [-0.33, 1.62], t(1846) = 1.30, p = 0.194; Std. beta = 0.02, 95% CI [-9.59e-03, 0.05] | beta = 0.68, 95% CI [-0.29, 1.64], t(1865) = 1.38, p = 0.169; Std. beta = 0.02, 95% CI [-8.42e-03, 0.05] |
| <b>GAD-7 – T3</b> | <b>Statin vs Neither</b>    | beta = -1.80, 95% CI [-3.00, -0.59], t(1824) = -2.92, p < .01; Std. beta = -0.34, 95% CI [-0.58, -0.11]  | beta = -0.01, 95% CI [-1.21, 1.18], t(1815) = -0.02, p = 0.983; Std. beta = -2.48e-03, 95% CI [-0.23, 0.23] | beta = -0.19, 95% CI [-1.08, 0.71], t(1759) = -0.41, p = 0.683; Std. beta = -0.04, 95% CI [-0.21, 0.14]  | beta = -0.35, 95% CI [-1.35, 0.66], t(1737) = -0.68, p = 0.499; Std. beta = -0.07, 95% CI [-0.26, 0.13]  | beta = -0.18, 95% CI [-1.07, 0.72], t(1756) = -0.39, p = 0.698; Std. beta = -0.03, 95% CI [-0.21, 0.14]  |
|                   | <b>BP vs Neither</b>        | beta = 0.16, 95% CI [-0.80, 1.13], t(1824) = 0.33, p = 0.740; Std. beta = 0.03, 95% CI [-0.15, 0.22]     | beta = 1.24, 95% CI [0.29, 2.19], t(1815) = 2.56, p < .05; Std. beta = 0.24, 95% CI [0.06, 0.42]            | beta = 0.50, 95% CI [-0.21, 1.21], t(1759) = 1.38, p = 0.169; Std. beta = 0.10, 95% CI [-0.04, 0.23]     | beta = 0.49, 95% CI [-0.22, 1.21], t(1737) = 1.35, p = 0.178; Std. beta = 0.09, 95% CI [-0.04, 0.23]     | beta = 0.57, 95% CI [-0.15, 1.28], t(1756) = 1.56, p = 0.118; Std. beta = 0.11, 95% CI [-0.03, 0.25]     |
|                   | <b>Both vs Neither</b>      | beta = -1.19, 95% CI [-2.21, -0.16], t(1824) = -2.28, p < .05; Std. beta = -0.23, 95% CI [-0.42, -0.03]  | beta = 0.65, 95% CI [-0.38, 1.68], t(1815) = 1.24, p = 0.216; Std. beta = 0.12, 95% CI [-0.07, 0.32]        | beta = -0.17, 95% CI [-0.94, 0.60], t(1759) = -0.44, p = 0.663; Std. beta = -0.03, 95% CI [-0.18, 0.12]  | beta = -0.20, 95% CI [-0.99, 0.59], t(1737) = -0.50, p = 0.619; Std. beta = -0.04, 95% CI [-0.19, 0.11]  | beta = -0.16, 95% CI [-0.92, 0.61], t(1756) = -0.40, p = 0.693; Std. beta = -0.03, 95% CI [-0.18, 0.12]  |
|                   | <b>UBHR – angry faces</b>   | beta = 2.63, 95% CI [0.84, 4.41], t(1799) = 2.89, p < .01; Std. beta = 0.07, 95% CI [0.02, 0.12]         | beta = 1.28, 95% CI [-0.45, 3.01], t(1790) = 1.45, p = 0.148; Std. beta = 0.03, 95% CI [-0.01, 0.08]        | beta = 1.14, 95% CI [-0.11, 2.39], t(1737) = 1.79, p = 0.073; Std. beta = 0.03, 95% CI [-2.89e-03, 0.06] | beta = 1.14, 95% CI [-0.12, 2.40], t(1715) = 1.77, p = 0.077; Std. beta = 0.03, 95% CI [-3.29e-03, 0.06] | beta = 1.11, 95% CI [-0.13, 2.36], t(1734) = 1.75, p = 0.080; Std. beta = 0.03, 95% CI [-3.60e-03, 0.06] |
|                   | <b>UBHR – fearful faces</b> | beta = 0.06, 95% CI [-1.60, 1.72], t(1799) = 0.07, p = 0.945; Std. beta = 1.66e-03, 95% CI [-0.05, 0.05] | beta = -0.37, 95% CI [-1.97, 1.23], t(1790) = -0.45, p = 0.650; Std. beta = -0.01, 95% CI [-0.06, 0.04]     | beta = -0.36, 95% CI [-1.51, 0.79], t(1737) = -0.62, p = 0.539; Std. beta = -0.01, 95% CI [-0.04, 0.02]  | beta = -0.36, 95% CI [-1.53, 0.81], t(1715) = -0.61, p = 0.543; Std. beta = -0.01, 95% CI [-0.04, 0.02]  | beta = -0.38, 95% CI [-1.52, 0.77], t(1734) = -0.64, p = 0.519; Std. beta = -0.01, 95% CI [-0.04, 0.02]  |
| <b>GAD-7 – T4</b> | <b>Statin vs Neither</b>    | beta = -1.76, 95% CI [-3.06, -0.46], t(1703) = -2.65, p < .01; Std. beta = -0.32, 95% CI [-0.55, -0.08]  | beta = 0.11, 95% CI [-1.18, 1.40], t(1694) = 0.16, p = 0.871; Std. beta = 0.02, 95% CI [-0.21, 0.25]        | beta = -0.35, 95% CI [-1.39, 0.68], t(1625) = -0.67, p = 0.505; Std. beta = -0.06, 95% CI [-0.25, 0.12]  | beta = -0.31, 95% CI [-1.46, 0.83], t(1606) = -0.53, p = 0.595; Std. beta = -0.06, 95% CI [-0.26, 0.15]  | beta = -0.34, 95% CI [-1.38, 0.69], t(1622) = -0.65, p = 0.514; Std. beta = -0.06, 95% CI [-0.25, 0.13]  |
|                   | <b>BP vs Neither</b>        | beta = -0.06, 95% CI [-1.10, 0.98], t(1703) = -0.12, p = 0.908; Std. beta = -0.01, 95% CI [-0.20, 0.18]  | beta = 1.19, 95% CI [0.16, 2.21], t(1694) = 2.26, p < .05; Std. beta = 0.21, 95% CI [0.03, 0.40]            | beta = 0.33, 95% CI [-0.50, 1.16], t(1625) = 0.79, p = 0.432; Std. beta = 0.06, 95% CI [-0.09, 0.21]     | beta = 0.34, 95% CI [-0.49, 1.17], t(1606) = 0.81, p = 0.421; Std. beta = 0.06, 95% CI [-0.09, 0.21]     | beta = 0.37, 95% CI [-0.46, 1.21], t(1622) = 0.88, p = 0.381; Std. beta = 0.07, 95% CI [-0.08, 0.22]     |
|                   | <b>Both vs Neither</b>      | beta = -1.85, 95% CI [-2.97, -0.73], t(1703) = -3.24, p < .01; Std. beta = -0.33, 95% CI [-0.54, -0.13]  | beta = 0.18, 95% CI [-0.95, 1.32], t(1694) = 0.32, p = 0.751; Std. beta = 0.03, 95% CI [-0.17, 0.24]        | beta = -0.59, 95% CI [-1.50, 0.32], t(1625) = -1.28, p = 0.202; Std. beta = -0.11, 95% CI [-0.27, 0.06]  | beta = -0.69, 95% CI [-1.62, 0.24], t(1606) = -1.46, p = 0.145; Std. beta = -0.13, 95% CI [-0.29, 0.04]  | beta = -0.59, 95% CI [-1.49, 0.32], t(1622) = -1.27, p = 0.206; Std. beta = -0.11, 95% CI [-0.25, 0.06]  |
|                   | <b>UBHR – angry faces</b>   | beta = 3.75, 95% CI [1.76, 5.74], t(1681) = 3.70, p < .001; Std. beta = 0.09, 95% CI [0.04, 0.14]        | beta = 2.40, 95% CI [0.48, 4.33], t(1672) = 2.45, p < .05; Std. beta = 0.06, 95% CI [0.01, 0.11]            | beta = 2.37, 95% CI [0.89, 3.85], t(1606) = 3.13, p < .01; Std. beta = 0.06, 95% CI [0.02, 0.10]         | beta = 2.37, 95% CI [0.87, 3.87], t(1587) = 3.10, p < .01; Std. beta = 0.06, 95% CI [0.02, 0.10]         | beta = 2.34, 95% CI [0.86, 3.82], t(1603) = 3.09, p < .01; Std. beta = 0.06, 95% CI [0.02, 0.10]         |
|                   | <b>UBHR – fearful faces</b> | beta = -0.50, 95% CI [-2.33, 1.33], t(1681) = -0.54, p =                                                 | beta = -0.92, 95% CI [-2.68, 0.85], t(1672) = -1.02, p =                                                    | beta = -0.68, 95% CI [-2.03, 0.67], t(1606) = -0.99, p =                                                 | beta = -0.75, 95% CI [-2.12, 0.63], t(1587) = -1.07, p =                                                 | beta = -0.65, 95% CI [-2.01, 0.70], t(1603) = -0.94, p =                                                 |

| Outcome                    | Predictor            | Full dataset                                                                                            |                                                                                                          |                                                                                                          | Sensitivity Checks                                                                                       |                                                                                                          |
|----------------------------|----------------------|---------------------------------------------------------------------------------------------------------|----------------------------------------------------------------------------------------------------------|----------------------------------------------------------------------------------------------------------|----------------------------------------------------------------------------------------------------------|----------------------------------------------------------------------------------------------------------|
|                            |                      | Uncorrected                                                                                             | Corrected for demographics                                                                               | Corrected for all covariates                                                                             | Excluding non-lipophilic                                                                                 | Excluding small gender groups                                                                            |
|                            |                      |                                                                                                         |                                                                                                          |                                                                                                          | Corrected for all covariates                                                                             |                                                                                                          |
|                            |                      | 0.592; Std. beta = -0.01, 95% CI [-0.06, 0.04]                                                          | 0.309; Std. beta = -0.02, 95% CI [-0.07, 0.02]                                                           | 0.323; Std. beta = -0.02, 95% CI [-0.06, 0.02]                                                           | 0.286; Std. beta = -0.02, 95% CI [-0.06, 0.02]                                                           | 0.345; Std. beta = -0.02, 95% CI [-0.05, 0.02]                                                           |
| Change in GAD-7 – BL to T2 | Statin vs Neither    | beta = 0.15, 95% CI [-0.62, 0.92], t(1916) = 0.38, p = 0.701; Std. beta = 0.04, 95% CI [-0.18, 0.27]    | beta = -0.05, 95% CI [-0.84, 0.75], t(1907) = -0.11, p = 0.909; Std. beta = -0.01, 95% CI [-0.25, 0.22]  | beta = -0.04, 95% CI [-0.83, 0.75], t(1898) = -0.09, p = 0.928; Std. beta = -0.01, 95% CI [-0.24, 0.22]  | beta = -0.31, 95% CI [-1.18, 0.56], t(1876) = -0.70, p = 0.486; Std. beta = -0.09, 95% CI [-0.35, 0.17]  | beta = -0.03, 95% CI [-0.82, 0.75], t(1895) = -0.09, p = 0.932; Std. beta = -0.01, 95% CI [-0.24, 0.22]  |
|                            | BP vs Neither        | beta = 0.56, 95% CI [-0.07, 1.19], t(1916) = 1.73, p = 0.083; Std. beta = 0.17, 95% CI [-0.02, 0.35]    | beta = 0.44, 95% CI [-0.20, 1.09], t(1907) = 1.34, p = 0.179; Std. beta = 0.13, 95% CI [-0.06, 0.32]     | beta = 0.51, 95% CI [-0.13, 1.14], t(1898) = 1.56, p = 0.119; Std. beta = 0.15, 95% CI [-0.04, 0.34]     | beta = 0.51, 95% CI [-0.13, 1.15], t(1876) = 1.57, p = 0.117; Std. beta = 0.15, 95% CI [-0.04, 0.34]     | beta = 0.52, 95% CI [-0.12, 1.16], t(1895) = 1.59, p = 0.111; Std. beta = 0.15, 95% CI [-0.04, 0.34]     |
|                            | Both vs Neither      | beta = 0.50, 95% CI [-0.16, 1.17], t(1916) = 1.48, p = 0.139; Std. beta = 0.15, 95% CI [-0.05, 0.34]    | beta = 0.29, 95% CI [-0.40, 0.99], t(1907) = 0.82, p = 0.411; Std. beta = 0.09, 95% CI [-0.12, 0.29]     | beta = 0.41, 95% CI [-0.29, 1.10], t(1898) = 1.15, p = 0.250; Std. beta = 0.12, 95% CI [-0.08, 0.32]     | beta = 0.37, 95% CI [-0.33, 1.08], t(1876) = 1.04, p = 0.300; Std. beta = 0.11, 95% CI [-0.10, 0.32]     | beta = 0.41, 95% CI [-0.28, 1.10], t(1895) = 1.16, p = 0.248; Std. beta = 0.12, 95% CI [-0.08, 0.33]     |
|                            | UBHR – angry faces   | beta = 0.58, 95% CI [-0.56, 1.72], t(1891) = 0.99, p = 0.321; Std. beta = 0.02, 95% CI [-0.02, 0.07]    | beta = 0.79, 95% CI [-0.36, 1.94], t(1882) = 1.35, p = 0.176; Std. beta = 0.03, 95% CI [-0.01, 0.08]     | beta = 0.70, 95% CI [-0.36, 1.76], t(1868) = 1.30, p = 0.193; Std. beta = 0.03, 95% CI [-0.01, 0.07]     | beta = 0.66, 95% CI [-0.40, 1.73], t(1846) = 1.22, p = 0.223; Std. beta = 0.03, 95% CI [-0.02, 0.07]     | beta = 0.70, 95% CI [-0.36, 1.76], t(1865) = 1.29, p = 0.198; Std. beta = 0.03, 95% CI [-0.01, 0.07]     |
|                            | UBHR – fearful faces | beta = 0.57, 95% CI [-0.48, 1.61], t(1891) = 1.07, p = 0.287; Std. beta = 0.03, 95% CI [-0.02, 0.07]    | beta = 0.67, 95% CI [-0.37, 1.72], t(1882) = 1.26, p = 0.207; Std. beta = 0.03, 95% CI [-0.02, 0.08]     | beta = 0.67, 95% CI [-0.29, 1.63], t(1868) = 1.37, p = 0.171; Std. beta = 0.03, 95% CI [-0.01, 0.07]     | beta = 0.64, 95% CI [-0.33, 1.62], t(1846) = 1.30, p = 0.194; Std. beta = 0.03, 95% CI [-0.01, 0.07]     | beta = 0.68, 95% CI [-0.29, 1.64], t(1865) = 1.38, p = 0.169; Std. beta = 0.03, 95% CI [-0.01, 0.07]     |
| Change in GAD-7 – BL to T3 | Statin vs Neither    | beta = 0.55, 95% CI [-0.36, 1.46], t(1824) = 1.19, p = 0.234; Std. beta = 0.14, 95% CI [-0.09, 0.37]    | beta = 0.36, 95% CI [-0.57, 1.30], t(1815) = 0.76, p = 0.445; Std. beta = 0.09, 95% CI [-0.15, 0.33]     | beta = 0.31, 95% CI [-0.63, 1.24], t(1764) = 0.64, p = 0.522; Std. beta = 0.08, 95% CI [-0.16, 0.32]     | beta = 0.11, 95% CI [-0.94, 1.15], t(1742) = 0.20, p = 0.843; Std. beta = 0.03, 95% CI [-0.24, 0.30]     | beta = 0.31, 95% CI [-0.62, 1.25], t(1761) = 0.66, p = 0.512; Std. beta = 0.08, 95% CI [-0.16, 0.32]     |
|                            | BP vs Neither        | beta = 0.54, 95% CI [-0.18, 1.27], t(1824) = 1.47, p = 0.142; Std. beta = 0.14, 95% CI [-0.05, 0.33]    | beta = 0.38, 95% CI [-0.36, 1.12], t(1815) = 1.00, p = 0.315; Std. beta = 0.10, 95% CI [-0.09, 0.29]     | beta = 0.40, 95% CI [-0.34, 1.14], t(1764) = 1.05, p = 0.292; Std. beta = 0.10, 95% CI [-0.09, 0.29]     | beta = 0.39, 95% CI [-0.35, 1.14], t(1742) = 1.04, p = 0.299; Std. beta = 0.10, 95% CI [-0.09, 0.29]     | beta = 0.47, 95% CI [-0.28, 1.21], t(1761) = 1.23, p = 0.219; Std. beta = 0.12, 95% CI [-0.07, 0.31]     |
|                            | Both vs Neither      | beta = 0.36, 95% CI [-0.41, 1.13], t(1824) = 0.92, p = 0.360; Std. beta = 0.09, 95% CI [-0.10, 0.29]    | beta = 0.18, 95% CI [-0.62, 0.99], t(1815) = 0.44, p = 0.658; Std. beta = 0.05, 95% CI [-0.16, 0.25]     | beta = 0.24, 95% CI [-0.57, 1.04], t(1764) = 0.58, p = 0.561; Std. beta = 0.06, 95% CI [-0.15, 0.27]     | beta = 0.22, 95% CI [-0.60, 1.05], t(1742) = 0.53, p = 0.597; Std. beta = 0.06, 95% CI [-0.15, 0.27]     | beta = 0.25, 95% CI [-0.55, 1.06], t(1761) = 0.61, p = 0.539; Std. beta = 0.06, 95% CI [-0.14, 0.27]     |
|                            | UBHR – angry faces   | beta = 0.92, 95% CI [-0.42, 2.27], t(1799) = 1.35, p = 0.178; Std. beta = 0.03, 95% CI [-0.01, 0.08]    | beta = 1.11, 95% CI [-0.24, 2.47], t(1790) = 1.61, p = 0.107; Std. beta = 0.04, 95% CI [-8.57e-03, 0.09] | beta = 1.14, 95% CI [-0.11, 2.39], t(1737) = 1.79, p = 0.073; Std. beta = 0.04, 95% CI [-3.83e-03, 0.08] | beta = 1.14, 95% CI [-0.12, 2.40], t(1715) = 1.77, p = 0.077; Std. beta = 0.04, 95% CI [-4.36e-03, 0.08] | beta = 1.11, 95% CI [-0.13, 2.36], t(1734) = 1.75, p = 0.080; Std. beta = 0.04, 95% CI [-4.78e-03, 0.08] |
|                            | UBHR – fearful faces | beta = -0.31, 95% CI [-1.57, 0.94], t(1799) = -0.49, p = 0.623; Std. beta = -0.01, 95% CI [-0.06, 0.04] | beta = -0.30, 95% CI [-1.56, 0.96], t(1790) = -0.47, p = 0.640; Std. beta = -0.01, 95% CI [-0.06, 0.04]  | beta = -0.36, 95% CI [-1.51, 0.79], t(1737) = -0.62, p = 0.539; Std. beta = -0.01, 95% CI [-0.06, 0.03]  | beta = -0.36, 95% CI [-1.53, 0.81], t(1715) = -0.61, p = 0.543; Std. beta = -0.01, 95% CI [-0.06, 0.03]  | beta = -0.38, 95% CI [-1.52, 0.77], t(1734) = -0.64, p = 0.519; Std. beta = -0.01, 95% CI [-0.06, 0.03]  |
| Change in GAD-7 – BL to T4 | Statin vs Neither    | beta = 0.45, 95% CI [-0.57, 1.48], t(1700) = 0.87, p =                                                  | beta = 0.33, 95% CI [-0.73, 1.38], t(1691) = 0.61, p =                                                   | beta = 0.19, 95% CI [-0.88, 1.26], t(1630) = 0.35, p =                                                   | beta = 0.20, 95% CI [-0.98, 1.38], t(1611) = 0.33, p =                                                   | beta = 0.20, 95% CI [-0.87, 1.26], t(1627) = 0.36, p =                                                   |

| Outcome | Predictor                   | Full dataset                                                                                            |                                                                                                         |                                                                                                         | Sensitivity Checks                                                                                      |                                                                                                         |
|---------|-----------------------------|---------------------------------------------------------------------------------------------------------|---------------------------------------------------------------------------------------------------------|---------------------------------------------------------------------------------------------------------|---------------------------------------------------------------------------------------------------------|---------------------------------------------------------------------------------------------------------|
|         |                             | Uncorrected                                                                                             | Corrected for demographics                                                                              | Corrected for all covariates                                                                            | Excluding non-lipophilic                                                                                | Excluding small gender groups                                                                           |
|         |                             |                                                                                                         |                                                                                                         |                                                                                                         | Corrected for all covariates                                                                            |                                                                                                         |
|         |                             | 0.385; Std. beta = 0.10, 95% CI [-0.13, 0.34]                                                           | 0.545; Std. beta = 0.08, 95% CI [-0.17, 0.32]                                                           | 0.730; Std. beta = 0.04, 95% CI [-0.20, 0.29]                                                           | 0.738; Std. beta = 0.05, 95% CI [-0.22, 0.32]                                                           | 0.720; Std. beta = 0.04, 95% CI [-0.20, 0.29]                                                           |
|         | <b>BP vs Neither</b>        | beta = 0.28, 95% CI [-0.55, 1.10], t(1700) = 0.66, p = 0.509; Std. beta = 0.06, 95% CI [-0.13, 0.25]    | beta = 0.23, 95% CI [-0.62, 1.07], t(1691) = 0.53, p = 0.597; Std. beta = 0.05, 95% CI [-0.14, 0.25]    | beta = 0.23, 95% CI [-0.62, 1.08], t(1630) = 0.53, p = 0.595; Std. beta = 0.05, 95% CI [-0.14, 0.25]    | beta = 0.24, 95% CI [-0.62, 1.09], t(1611) = 0.55, p = 0.585; Std. beta = 0.05, 95% CI [-0.14, 0.25]    | beta = 0.27, 95% CI [-0.59, 1.13], t(1627) = 0.62, p = 0.536; Std. beta = 0.06, 95% CI [-0.13, 0.26]    |
|         | <b>Both vs Neither</b>      | beta = -0.09, 95% CI [-0.97, 0.80], t(1700) = -0.19, p = 0.847; Std. beta = -0.02, 95% CI [-0.22, 0.18] | beta = -0.21, 95% CI [-1.14, 0.72], t(1691) = -0.44, p = 0.657; Std. beta = -0.05, 95% CI [-0.26, 0.17] | beta = -0.11, 95% CI [-1.04, 0.83], t(1630) = -0.22, p = 0.825; Std. beta = -0.02, 95% CI [-0.24, 0.19] | beta = -0.20, 95% CI [-1.16, 0.76], t(1611) = -0.40, p = 0.689; Std. beta = -0.04, 95% CI [-0.26, 0.17] | beta = -0.10, 95% CI [-1.04, 0.83], t(1627) = -0.21, p = 0.833; Std. beta = -0.02, 95% CI [-0.24, 0.19] |
|         | <b>UBHR – angry faces</b>   | beta = 2.15, 95% CI [0.59, 3.72], t(1678) = 2.70, p < .01; Std. beta = 0.07, 95% CI [0.02, 0.12]        | beta = 2.31, 95% CI [0.73, 3.89], t(1669) = 2.87, p < .01; Std. beta = 0.07, 95% CI [0.02, 0.12]        | beta = 2.37, 95% CI [0.89, 3.85], t(1606) = 3.13, p < .01; Std. beta = 0.07, 95% CI [0.03, 0.12]        | beta = 2.37, 95% CI [0.87, 3.87], t(1587) = 3.10, p < .01; Std. beta = 0.07, 95% CI [0.03, 0.12]        | beta = 2.34, 95% CI [0.86, 3.82], t(1603) = 3.09, p < .01; Std. beta = 0.07, 95% CI [0.03, 0.12]        |
|         | <b>UBHR – fearful faces</b> | beta = -0.58, 95% CI [-2.02, 0.86], t(1678) = -0.80, p = 0.426; Std. beta = -0.02, 95% CI [-0.07, 0.03] | beta = -0.52, 95% CI [-1.96, 0.93], t(1669) = -0.70, p = 0.484; Std. beta = -0.02, 95% CI [-0.07, 0.03] | beta = -0.68, 95% CI [-2.03, 0.67], t(1606) = -0.99, p = 0.323; Std. beta = -0.02, 95% CI [-0.07, 0.02] | beta = -0.75, 95% CI [-2.12, 0.63], t(1587) = -1.07, p = 0.286; Std. beta = -0.03, 95% CI [-0.07, 0.02] | beta = -0.65, 95% CI [-2.01, 0.70], t(1603) = -0.94, p = 0.345; Std. beta = -0.02, 95% CI [-0.07, 0.02] |



## ECAT and EREC

| Outcome                         | Groups            | Full dataset (n=2013)                                                                      |                                                                                                  |                                                                                            |                                                                                                            |                                                                                            |                                                                                                        | Sensitivity Analyses                                                                       |                                                                                                        |                                                                                            |                                                                                                        |                                                                                            |                                                                                                      |                                                                                            |                                                                                                              |
|---------------------------------|-------------------|--------------------------------------------------------------------------------------------|--------------------------------------------------------------------------------------------------|--------------------------------------------------------------------------------------------|------------------------------------------------------------------------------------------------------------|--------------------------------------------------------------------------------------------|--------------------------------------------------------------------------------------------------------|--------------------------------------------------------------------------------------------|--------------------------------------------------------------------------------------------------------|--------------------------------------------------------------------------------------------|--------------------------------------------------------------------------------------------------------|--------------------------------------------------------------------------------------------|------------------------------------------------------------------------------------------------------|--------------------------------------------------------------------------------------------|--------------------------------------------------------------------------------------------------------------|
|                                 |                   |                                                                                            |                                                                                                  |                                                                                            |                                                                                                            |                                                                                            |                                                                                                        | Excluding non-lipophilic (n=1991)                                                          |                                                                                                        | Excluding small gender groups (n=2007)                                                     |                                                                                                        | Excluding poor ECAT performance (<90%) (n=1445)                                            |                                                                                                      | Excluding EREC poor performance (zero correct words) (n=1975)                              |                                                                                                              |
|                                 |                   | Uncorrected                                                                                |                                                                                                  | Corrected for demographics                                                                 |                                                                                                            | Corrected for all covariates                                                               |                                                                                                        | Corrected for all covariates                                                               |                                                                                                        | Corrected for all covariates                                                               |                                                                                                        | Corrected for all covariates                                                               |                                                                                                      | Corrected for all covariates                                                               |                                                                                                              |
|                                 |                   | ANCOVA                                                                                     | Linear regression                                                                                | ANCOVA                                                                                     | Linear regression                                                                                          | ANCOVA                                                                                     | Linear regression                                                                                      | ANCOVA                                                                                     | Linear regression                                                                                      | ANCOVA                                                                                     | Linear regression                                                                                      | ANCOVA                                                                                     | Linear regression                                                                                    | ANCOVA                                                                                     | Linear regression                                                                                            |
| ECAT – Accuracy (both valences) | All               | Group: F(3) = 1.58, p = 0.193; Eta2 (partial) = 2.54e-03, 90% CI [0.00, 6.36e-03]          | N/A                                                                                              | Group: F(3) = 0.52, p = 0.669; Eta2 (partial) = 8.43e-04, 90% CI [0.00, 2.76e-03]          | N/A                                                                                                        | Group: F(3) = 0.49, p = 0.687; Eta2 (partial) = 8.44e-04, 90% CI [0.00, 2.79e-03]          | N/A                                                                                                    | Group: F(3) = 0.50, p = 0.684; Eta2 (partial) = 8.63e-04, 90% CI [0.00, 2.85e-03]          | N/A                                                                                                    | Group: F(3) = 0.43, p = 0.728; Eta2 (partial) = 7.46e-04, 90% CI [0.00, 2.50e-03]          | N/A                                                                                                    | Group: F(3) = 1.27, p = 0.284; Eta2 (partial) = 2.87e-03, 90% CI [0.00, 7.62e-03]          | N/A                                                                                                  | Group: F(3) = 0.60, p = 0.614; Eta2 (partial) = 1.05e-03, 90% CI [0.00, 3.35e-03]          | N/A                                                                                                          |
|                                 |                   | Interaction: F(3) = 9.22, p < .001; Eta2 (partial) = 3.10e-03, 90% CI [1.28e-03, 5.07e-03] |                                                                                                  | Interaction: F(3) = 9.22, p < .001; Eta2 (partial) = 3.10e-03, 90% CI [1.28e-03, 5.07e-03] |                                                                                                            | Interaction: F(3) = 8.73, p < .001; Eta2 (partial) = 3.00e-03, 90% CI [1.19e-03, 4.97e-03] |                                                                                                        | Interaction: F(3) = 8.78, p < .001; Eta2 (partial) = 3.05e-03, 90% CI [1.22e-03, 5.05e-03] |                                                                                                        | Interaction: F(3) = 8.46, p < .001; Eta2 (partial) = 2.91e-03, 90% CI [1.13e-03, 4.86e-03] |                                                                                                        | Interaction: F(3) = 9.40, p < .001; Eta2 (partial) = 4.29e-03, 90% CI [1.79e-03, 6.99e-03] |                                                                                                      | Interaction: F(3) = 8.95, p < .001; Eta2 (partial) = 3.12e-03, 90% CI [1.26e-03, 5.14e-03] |                                                                                                              |
| ECAT – Accuracy (positive)      | All               | F(3) = 5.54, p < .001; Eta2 (partial) = 8.69e-03, 90% CI [2.29e-03, 0.02]                  | N/A                                                                                              | F(3) = 0.20, p = 0.899; Eta2 (partial) = 3.13e-04, 90% CI [0.00, 8.39e-04]                 | N/A                                                                                                        | F(3) = 0.14, p = 0.933; Eta2 (partial) = 2.44e-04, 90% CI [0.00, 3.54e-04]                 | N/A                                                                                                    | F(3) = 0.13, p = 0.945; Eta2 (partial) = 2.14e-04, 90% CI [0.00, 1.14e-04]                 | N/A                                                                                                    | F(3) = 0.16, p = 0.920; Eta2 (partial) = 2.79e-04, 90% CI [0.00, 5.83e-04]                 | N/A                                                                                                    | F(3) = 0.52, p = 0.672; Eta2 (partial) = 1.17e-03, 90% CI [0.00, 3.85e-03]                 | N/A                                                                                                  | F(3) = 0.14, p = 0.933; Eta2 (partial) = 2.48e-04, 90% CI [0.00, 3.60e-04]                 | N/A                                                                                                          |
|                                 | Statin vs Neither | F(1) = 4.70, p = 0.030; Eta2 (partial) = 2.80e-03, 90% CI [1.39e-04, 8.61e-03]             | beta = 1.38, 95% CI [0.16, 2.60], t(5510) = 2.22, p < .05; Std. beta = 0.20, 95% CI [0.02, 0.38] | F(1) = 0.02, p = 0.902; Eta2 (partial) = 9.08e-06, 90% CI [0.00, 8.11e-04]                 | beta = -0.04, 95% CI [-1.25, 1.17], t(5501) = 0.06, p = 0.949; Std. beta = -5.80e-03, 95% CI [-0.18, 0.17] | F(1) = 0.06, p = 0.813; Eta2 (partial) = 3.55e-05, 90% CI [0.00, 1.73e-03]                 | beta = -0.11, 95% CI [-1.35, 1.13], t(5267) = 0.17, p = 0.864; Std. beta = -0.02, 95% CI [-0.20, 0.17] | F(1) = 0.04, p = 0.835; Eta2 (partial) = 2.79e-05, 90% CI [0.00, 1.55e-03]                 | beta = -0.11, 95% CI [-1.49, 1.26], t(5267) = 0.16, p = 0.871; Std. beta = -0.02, 95% CI [-0.22, 0.19] | F(1) = 0.06, p = 0.814; Eta2 (partial) = 3.50e-05, 90% CI [0.00, 1.69e-03]                 | beta = -0.10, 95% CI [-1.34, 1.14], t(5316) = 0.16, p = 0.872; Std. beta = -0.02, 95% CI [-0.20, 0.17] | F(1) = 0.51, p = 0.474; Eta2 (partial) = 4.41e-04, 90% CI [0.00, 4.72e-03]                 | beta = 0.36, 95% CI [-0.58, 1.31], t(3927) = 0.76, p = 0.448; Std. beta = 0.08, 95% CI [-0.12, 0.27] | F(1) = 3.49e-03, p = 0.953; Eta2 (partial) = 2.26e-06, 90% CI [0.00, 0.00]                 | beta = 7.73e-03, 95% CI [-1.24, 1.25], t(5248) = 0.01, p = 0.990; Std. beta = 1.14e-03, 95% CI [-0.18, 0.19] |

| Outcome                           | Groups                   | Full dataset (n=2013)                                                      |                                                                                                      |                                                                            |                                                                                                         |                                                                            |                                                                                                         | Sensitivity Analyses                                                       |                                                                                                         |                                                                            |                                                                                                         |                                                                            |                                                                                                         |                                                                            |                                                                                                         |
|-----------------------------------|--------------------------|----------------------------------------------------------------------------|------------------------------------------------------------------------------------------------------|----------------------------------------------------------------------------|---------------------------------------------------------------------------------------------------------|----------------------------------------------------------------------------|---------------------------------------------------------------------------------------------------------|----------------------------------------------------------------------------|---------------------------------------------------------------------------------------------------------|----------------------------------------------------------------------------|---------------------------------------------------------------------------------------------------------|----------------------------------------------------------------------------|---------------------------------------------------------------------------------------------------------|----------------------------------------------------------------------------|---------------------------------------------------------------------------------------------------------|
|                                   |                          |                                                                            |                                                                                                      |                                                                            |                                                                                                         |                                                                            |                                                                                                         | Excluding non-lipophilic (n=1991)                                          |                                                                                                         | Excluding small gender groups (n=2007)                                     |                                                                                                         | Excluding poor ECAT performance (<90%) (n=1445)                            |                                                                                                         | Excluding EREC poor performance (zero correct words) (n=1975)              |                                                                                                         |
|                                   |                          | Uncorrected                                                                |                                                                                                      | Corrected for demographics                                                 |                                                                                                         | Corrected for all covariates                                               |                                                                                                         | Corrected for all covariates                                               |                                                                                                         |                                                                            |                                                                                                         |                                                                            |                                                                                                         |                                                                            |                                                                                                         |
|                                   |                          | ANCOVA                                                                     | Linear regression                                                                                    | ANCOVA                                                                     | Linear regression                                                                                       | ANCOVA                                                                     | Linear regression                                                                                       | ANCOVA                                                                     | Linear regression                                                                                       | ANCOVA                                                                     | Linear regression                                                                                       | ANCOVA                                                                     | Linear regression                                                                                       | ANCOVA                                                                     | Linear regression                                                                                       |
|                                   | <b>BP vs Neither</b>     | F(1) = 6.73, p = 0.010; Eta2 (partial) = 3.91e-03, 90% CI [5.21e-04, 0.01] | beta = 1.34, 95% CI [0.33, 2.34], t(5510) = 2.61, p < .01; Std. beta = 0.20, 95% CI [0.05, 0.34]     | F(1) = 0.29, p = 0.592; Eta2 (partial) = 1.69e-04, 90% CI [0.00, 2.70e-03] | beta = 0.30, 95% CI [-0.69, 1.28], t(5501) = 0.59, p = 0.556; Std. beta = 0.04, 95% CI [-0.10, 0.19]    | F(1) = 0.10, p = 0.758; Eta2 (partial) = 5.97e-05, 90% CI [0.00, 2.04e-03] | beta = 0.19, 95% CI [-0.83, 1.20], t(5329) = 0.36, p = 0.721; Std. beta = 0.03, 95% CI [-0.12, 0.18]    | F(1) = 0.09, p = 0.760; Eta2 (partial) = 5.87e-05, 90% CI [0.00, 1.89e-03] | beta = 0.17, 95% CI [-0.85, 1.19], t(5267) = 0.32, p = 0.747; Std. beta = 0.02, 95% CI [-0.13, 0.17]    | F(1) = 0.15, p = 0.701; Eta2 (partial) = 9.30e-05, 90% CI [0.00, 2.36e-03] | beta = 0.23, 95% CI [-0.79, 1.25], t(5316) = 0.44, p = 0.661; Std. beta = 0.03, 95% CI [-0.12, 0.18]    | F(1) = 0.41, p = 0.521; Eta2 (partial) = 3.50e-04, 90% CI [0.00, 4.37e-03] | beta = 0.27, 95% CI [-0.51, 1.04], t(3927) = 0.68, p = 0.498; Std. beta = 0.06, 95% CI [-0.11, 0.22]    | F(1) = 0.07, p = 0.787; Eta2 (partial) = 4.65e-05, 90% CI [0.00, 1.89e-03] | beta = 0.16, 95% CI [-0.86, 1.19], t(5248) = 0.31, p = 0.753; Std. beta = 0.02, 95% CI [-0.13, 0.18]    |
|                                   | <b>Both vs Neither</b>   | F(1) = 6.57, p = 0.010; Eta2 (partial) = 3.83e-03, 90% CI [4.88e-04, 0.01] | beta = 1.40, 95% CI [0.35, 2.45], t(5510) = 2.60, p < .01; Std. beta = 0.21, 95% CI [0.05, 0.36]     | F(1) = 0.23, p = 0.633; Eta2 (partial) = 1.35e-04, 90% CI [0.00, 2.54e-03] | beta = -0.23, 95% CI [-1.29, 0.84], t(5501) = -0.41, p = 0.678; Std. beta = -0.03, 95% CI [-0.19, 0.12] | F(1) = 0.26, p = 0.610; Eta2 (partial) = 1.63e-04, 90% CI [0.00, 2.86e-03] | beta = -0.27, 95% CI [-1.37, 0.82], t(5329) = -0.48, p = 0.628; Std. beta = -0.04, 95% CI [-0.20, 0.12] | F(1) = 0.22, p = 0.642; Eta2 (partial) = 1.36e-04, 90% CI [0.00, 2.65e-03] | beta = -0.26, 95% CI [-1.38, 0.86], t(5267) = -0.46, p = 0.646; Std. beta = -0.04, 95% CI [-0.20, 0.13] | F(1) = 0.26, p = 0.612; Eta2 (partial) = 1.62e-04, 90% CI [0.00, 2.79e-03] | beta = -0.26, 95% CI [-1.36, 0.83], t(5316) = -0.47, p = 0.638; Std. beta = -0.04, 95% CI [-0.20, 0.12] | F(1) = 0.37, p = 0.541; Eta2 (partial) = 3.15e-04, 90% CI [0.00, 4.20e-03] | beta = -0.26, 95% CI [-1.08, 0.57], t(3927) = -0.61, p = 0.545; Std. beta = -0.05, 95% CI [-0.23, 0.12] | F(1) = 0.32, p = 0.572; Eta2 (partial) = 2.03e-04, 90% CI [0.00, 3.02e-03] | beta = -0.30, 95% CI [-1.42, 0.81], t(5248) = -0.53, p = 0.593; Std. beta = -0.04, 95% CI [-0.21, 0.12] |
| <b>ECAT – Accuracy (negative)</b> | <b>All</b>               | F(3) = 0.15, p = 0.932; Eta2 (partial) = 2.44e-04, 90% CI [0.00, 3.73e-04] | N/A                                                                                                  | F(3) = 1.37, p = 0.250; Eta2 (partial) = 2.29e-03, 90% CI [0.00, 5.95e-03] | N/A                                                                                                     | F(3) = 1.20, p = 0.307; Eta2 (partial) = 2.12e-03, 90% CI [0.00, 5.71e-03] | N/A                                                                                                     | F(3) = 1.22, p = 0.302; Eta2 (partial) = 2.16e-03, 90% CI [0.00, 5.81e-03] | N/A                                                                                                     | F(3) = 1.05, p = 0.367; Eta2 (partial) = 1.86e-03, 90% CI [0.00, 5.19e-03] | N/A                                                                                                     | F(3) = 2.59, p = 0.052; Eta2 (partial) = 5.89e-03, 90% CI [0.00, 0.01]     | N/A                                                                                                     | F(3) = 1.41, p = 0.238; Eta2 (partial) = 2.53e-03, 90% CI [0.00, 6.53e-03] | N/A                                                                                                     |
|                                   | <b>Statin vs Neither</b> | F(1) = 0.04, p = 0.849; Eta2 (partial) = 2.30e-05, 90% CI [0.00, 1.41e-03] | beta = 0.12, 95% CI [-1.09, 1.32], t(5510) = 0.19, p = 0.850; Std. beta = 0.02, 95% CI [-0.16, 0.19] | F(1) = 0.25, p = 0.616; Eta2 (partial) = 1.60e-04, 90% CI [0.00, 2.80e-03] | beta = -0.28, 95% CI [-1.49, 0.93], t(5501) = -0.45, p = 0.653; Std. beta = -0.04, 95% CI [-0.22, 0.14] | F(1) = 0.28, p = 0.599; Eta2 (partial) = 1.83e-04, 90% CI [0.00, 4.11e-04] | beta = -0.29, 95% CI [-1.52, 0.94], t(5329) = -0.46, p = 0.647; Std. beta = -0.04, 95% CI [-0.22, 0.14] | F(1) = 0.82, p = 0.365; Eta2 (partial) = 5.48e-04, 90% CI [0.00, 4.32e-03] | beta = -0.57, 95% CI [-1.93, 0.80], t(5267) = -0.81, p = 0.415; Std. beta = -0.08, 95% CI [-0.28, 0.12] | F(1) = 0.28, p = 0.599; Eta2 (partial) = 1.84e-04, 90% CI [0.00, 3.02e-03] | beta = -0.28, 95% CI [-1.51, 0.95], t(5316) = -0.44, p = 0.658; Std. beta = -0.04, 95% CI [-0.22, 0.14] | F(1) = 0.17, p = 0.680; Eta2 (partial) = 1.47e-04, 90% CI [0.00, 3.38e-03] | beta = -0.18, 95% CI [-1.07, 0.71], t(3927) = -0.40, p = 0.690; Std. beta = -0.04, 95% CI [-0.22, 0.15] | F(1) = 0.17, p = 0.681; Eta2 (partial) = 1.14e-04, 90% CI [0.00, 2.64e-03] | beta = -0.21, 95% CI [-1.44, 1.02], t(5248) = -0.34, p = 0.736; Std. beta = -0.03, 95% CI [-0.21, 0.15] |

| Outcome          | Groups                 | Full dataset (n=2013)                                                                                                                                                            |                                                                                                         |                                                                                                                                                                                  |                                                                                                         |                                                                                                                                                                                  |                                                                                                         | Sensitivity Analyses                                                                                                                                                             |                                                                                                         |                                                                                                                                                                                  |                                                                                                         |                                                                                                                                                                                  |                                                                                                             |                                                                                                                                                                                  |                                                                                                         |
|------------------|------------------------|----------------------------------------------------------------------------------------------------------------------------------------------------------------------------------|---------------------------------------------------------------------------------------------------------|----------------------------------------------------------------------------------------------------------------------------------------------------------------------------------|---------------------------------------------------------------------------------------------------------|----------------------------------------------------------------------------------------------------------------------------------------------------------------------------------|---------------------------------------------------------------------------------------------------------|----------------------------------------------------------------------------------------------------------------------------------------------------------------------------------|---------------------------------------------------------------------------------------------------------|----------------------------------------------------------------------------------------------------------------------------------------------------------------------------------|---------------------------------------------------------------------------------------------------------|----------------------------------------------------------------------------------------------------------------------------------------------------------------------------------|-------------------------------------------------------------------------------------------------------------|----------------------------------------------------------------------------------------------------------------------------------------------------------------------------------|---------------------------------------------------------------------------------------------------------|
|                  |                        |                                                                                                                                                                                  |                                                                                                         |                                                                                                                                                                                  |                                                                                                         |                                                                                                                                                                                  |                                                                                                         | Excluding non-lipophilic (n=1991)                                                                                                                                                |                                                                                                         | Excluding small gender groups (n=2007)                                                                                                                                           |                                                                                                         | Excluding poor ECAT performance (<90%) (n=1445)                                                                                                                                  |                                                                                                             | Excluding EREC poor performance (zero correct words) (n=1975)                                                                                                                    |                                                                                                         |
|                  |                        | Uncorrected                                                                                                                                                                      |                                                                                                         | Corrected for demographics                                                                                                                                                       |                                                                                                         | Corrected for all covariates                                                                                                                                                     |                                                                                                         | Corrected for all covariates                                                                                                                                                     |                                                                                                         |                                                                                                                                                                                  |                                                                                                         |                                                                                                                                                                                  |                                                                                                             |                                                                                                                                                                                  |                                                                                                         |
|                  |                        | ANCOVA                                                                                                                                                                           | Linear regression                                                                                           | ANCOVA                                                                                                                                                                           | Linear regression                                                                                       |
|                  | <b>BP vs Neither</b>   | (F(1) = 0.14, p = 0.705; Eta2 (partial) = 8.80e-05, 90% CI [0.00, 2.32e-03])                                                                                                     | beta = -0.19, 95% CI [-1.18, 0.79], t(5510) = -0.39, p = 0.700; Std. beta = -0.03, 95% CI [-0.17, 0.12] | F(1) = 1.82, p = 0.178; Eta2 (partial) = 1.12e-03, 90% CI [0.00, 5.50e-03]                                                                                                       | beta = -0.67, 95% CI [-1.66, 0.31], t(5501) = -1.34, p = 0.181; Std. beta = -0.10, 95% CI [-0.24, 0.05] | F(1) = 2.36, p = 0.125; Eta2 (partial) = 1.54e-03, 90% CI [0.00, 6.59e-03]                                                                                                       | beta = -0.77, 95% CI [-1.78, 0.24], t(5329) = -1.49, p = 0.136; Std. beta = -0.11, 95% CI [-0.26, 0.04] | F(1) = 2.39, p = 0.122; Eta2 (partial) = 1.57e-03, 90% CI [0.00, 6.64e-03]                                                                                                       | beta = -0.78, 95% CI [-1.79, 0.23], t(5267) = -1.51, p = 0.132; Std. beta = -0.11, 95% CI [-0.26, 0.03] | F(1) = 1.89, p = 0.169; Eta2 (partial) = 1.24e-03, 90% CI [0.00, 5.96e-03]                                                                                                       | beta = -0.69, 95% CI [-1.70, 0.33], t(5316) = -1.33, p = 0.184; Std. beta = -0.10, 95% CI [-0.25, 0.05] | F(1) = 3.98, p = 0.046; Eta2 (partial) = 3.38e-03, 90% CI [2.86e-05, 0.01]                                                                                                       | beta = -0.71, 95% CI [-1.44, 0.02], t(3927) = -1.90, p = 0.057; Std. beta = -0.15, 95% CI [-0.30, 4.55e-03] | F(1) = 2.54, p = 0.111; Eta2 (partial) = 1.69e-03, 90% CI [0.00, 6.96e-03]                                                                                                       | beta = -0.80, 95% CI [-1.81, 0.21], t(5248) = -1.55, p = 0.121; Std. beta = -0.12, 95% CI [-0.27, 0.03] |
|                  | <b>Both vs Neither</b> | (F(1) = 0.26, p = 0.613; Eta2 (partial) = 1.58e-04, 90% CI [0.00, 2.74e-03])                                                                                                     | beta = -0.27, 95% CI [-1.31, 0.77], t(5510) = -0.51, p = 0.611; Std. beta = -0.04, 95% CI [-0.19, 0.11] | F(1) = 3.43, p = 0.064; Eta2 (partial) = 2.13e-03, 90% CI [0.00, 7.56e-03]                                                                                                       | beta = -0.90, 95% CI [-1.96, 0.16], t(5501) = -1.66, p = 0.098; Std. beta = -0.13, 95% CI [-0.29, 0.02] | F(1) = 2.38, p = 0.123; Eta2 (partial) = 1.56e-03, 90% CI [0.00, 6.61e-03]                                                                                                       | beta = -0.74, 95% CI [-1.83, 0.34], t(5329) = -1.34, p = 0.181; Std. beta = -0.11, 95% CI [-0.27, 0.05] | F(1) = 2.00, p = 0.157; Eta2 (partial) = 1.31e-03, 90% CI [0.00, 6.11e-03]                                                                                                       | beta = -0.68, 95% CI [-1.78, 0.43], t(5267) = -1.19, p = 0.232; Std. beta = -0.10, 95% CI [-0.26, 0.06] | F(1) = 2.40, p = 0.122; Eta2 (partial) = 1.57e-03, 90% CI [0.00, 6.65e-03]                                                                                                       | beta = -0.73, 95% CI [-1.82, 0.35], t(5316) = -1.32, p = 0.186; Std. beta = -0.11, 95% CI [-0.27, 0.05] | F(1) = 5.68, p = 0.017; Eta2 (partial) = 4.79e-03, 90% CI [4.48e-04, 0.01]                                                                                                       | beta = -0.89, 95% CI [-1.67, -0.11], t(3927) = -2.24, p < .05; Std. beta = -0.19, 95% CI [-0.35, -0.02]     | F(1) = 3.03, p = 0.082; Eta2 (partial) = 2.02e-03, 90% CI [0.00, 7.59e-03]                                                                                                       | beta = -0.86, 95% CI [-1.96, 0.24], t(5248) = -1.53, p = 0.127; Std. beta = -0.13, 95% CI [-0.29, 0.04] |
| <b>ECAT – RT</b> | <b>All</b>             | Group: F(3) = 1.27, p = 0.284; Eta2 (partial) = 1.92e-03, 90% CI [0.00, 5.11e-03]<br><br>Interaction: F(3) = 0.63, p = 0.592; Eta2 (partial) = 2.12e-04, 90% CI [0.00, 6.70e-04] | N/A                                                                                                     | Group: F(3) = 0.18, p = 0.913; Eta2 (partial) = 2.68e-04, 90% CI [0.00, 6.29e-04]<br><br>Interaction: F(3) = 0.63, p = 0.592; Eta2 (partial) = 2.12e-04, 90% CI [0.00, 4.75e-04] | N/A                                                                                                     | Group: F(3) = 0.31, p = 0.815; Eta2 (partial) = 5.10e-04, 90% CI [0.00, 1.71e-03]<br><br>Interaction: F(3) = 0.64, p = 0.591; Eta2 (partial) = 2.17e-04, 90% CI [0.00, 6.87e-04] | N/A                                                                                                     | Group: F(3) = 0.17, p = 0.915; Eta2 (partial) = 2.83e-04, 90% CI [0.00, 6.48e-04]<br><br>Interaction: F(3) = 0.22, p = 0.886; Eta2 (partial) = 7.42e-05, 90% CI [0.00, 2.16e-04] | N/A                                                                                                     | Group: F(3) = 0.29, p = 0.831; Eta2 (partial) = 4.74e-04, 90% CI [0.00, 1.57e-03]<br><br>Interaction: F(3) = 0.61, p = 0.606; Eta2 (partial) = 2.10e-04, 90% CI [0.00, 6.69e-04] | N/A                                                                                                     | Group: F(3) = 0.57, p = 0.632; Eta2 (partial) = 1.29e-03, 90% CI [0.00, 4.16e-03]<br><br>Interaction: F(3) = 1.25, p = 0.290; Eta2 (partial) = 5.74e-04, 90% CI [0.00, 1.53e-03] | N/A                                                                                                         | Group: F(3) = 0.37, p = 0.775; Eta2 (partial) = 6.08e-04, 90% CI [0.00, 2.05e-03]<br><br>Interaction: F(3) = 0.61, p = 0.606; Eta2 (partial) = 2.13e-04, 90% CI [0.00, 6.78e-04] | N/A                                                                                                     |



| Outcome                                | Groups                   | Full dataset (n=2013)                                                      |                                                                                                            |                                                                                |                                                                                                             |                                                                                |                                                                                                         | Sensitivity Analyses                                                           |                                                                                                                 |                                                                                |                                                                                                         |                                                                            |                                                                                                         |                                                                            |                                                                                                         |
|----------------------------------------|--------------------------|----------------------------------------------------------------------------|------------------------------------------------------------------------------------------------------------|--------------------------------------------------------------------------------|-------------------------------------------------------------------------------------------------------------|--------------------------------------------------------------------------------|---------------------------------------------------------------------------------------------------------|--------------------------------------------------------------------------------|-----------------------------------------------------------------------------------------------------------------|--------------------------------------------------------------------------------|---------------------------------------------------------------------------------------------------------|----------------------------------------------------------------------------|---------------------------------------------------------------------------------------------------------|----------------------------------------------------------------------------|---------------------------------------------------------------------------------------------------------|
|                                        |                          |                                                                            |                                                                                                            |                                                                                |                                                                                                             |                                                                                |                                                                                                         | Excluding non-lipophilic (n=1991)                                              |                                                                                                                 | Excluding small gender groups (n=2007)                                         |                                                                                                         | Excluding poor ECAT performance (<90%) (n=1445)                            |                                                                                                         | Excluding EREC poor performance (zero correct words) (n=1975)              |                                                                                                         |
|                                        |                          | Uncorrected                                                                |                                                                                                            | Corrected for demographics                                                     |                                                                                                             | Corrected for all covariates                                                   |                                                                                                         | Corrected for all covariates                                                   |                                                                                                                 |                                                                                |                                                                                                         |                                                                            |                                                                                                         |                                                                            |                                                                                                         |
|                                        |                          | ANCOVA                                                                     | Linear regression                                                                                          | ANCOVA                                                                         | Linear regression                                                                                           | ANCOVA                                                                         | Linear regression                                                                                       | ANCOVA                                                                         | Linear regression                                                                                               | ANCOVA                                                                         | Linear regression                                                                                       | ANCOVA                                                                     | Linear regression                                                                                       | ANCOVA                                                                     | Linear regression                                                                                       |
|                                        |                          | [0.00, 6.49e-03]                                                           | beta = -0.13, 95% CI [-0.27, 0.01]                                                                         | [0.00, 4.09e-03]                                                               | beta = -0.07, 95% CI [-0.21, 0.07]                                                                          | [0.00, 3.78e-03]                                                               | beta = -0.06, 95% CI [-0.20, 0.09]                                                                      | [0.00, 3.82e-03]                                                               | beta = -0.06, 95% CI [-0.21, 0.08]                                                                              | [0.00, 1.07e-03]                                                               | beta = -0.06, 95% CI [-0.21, 0.09]                                                                      | [0.00, 6.57e-03]                                                           | beta = -0.10, 95% CI [-0.27, 0.07]                                                                      | [0.00, 3.37e-03]                                                           | Std. beta = -0.05, 95% CI [-0.19, 0.10]                                                                 |
|                                        | <b>Both vs Neither</b>   | F(1) = 15.36, p < .001; Eta2 (partial) = 8.55e-03, 90% CI [2.89e-03, 0.02] | (beta = -0.66, 95% CI [-1.00, -0.33], t(5782) = -3.90, p < .001; Std. beta = -0.30, 95% CI [-0.44, -0.15]) | F(1) = 5.33, p = 0.021; Eta2 (partial) = 3.00e-03, 90% CI [2.37e-04, 8.75e-03] | beta = -0.36, 95% CI [-0.71, -0.02], t(5773) = -2.09, p < .05; Std. beta = -0.16, 95% CI [-0.32, -9.81e-03] | F(1) = 3.87, p = 0.049; Eta2 (partial) = 2.30e-03, 90% CI [2.80e-06, 7.71e-03] | beta = -0.32, 95% CI [-0.68, 0.03], t(5595) = -1.80, p = 0.072; Std. beta = -0.14, 95% CI [-0.30, 0.01] | F(1) = 4.45, p = 0.035; Eta2 (partial) = 2.65e-03, 90% CI [9.58e-05, 8.36e-03] | beta = -0.36, 95% CI [-0.72, -2.23e-03], t(5529) = -1.97, p < .05; Std. beta = -0.16, 95% CI [-0.32, -9.93e-04] | F(1) = 3.85, p = 0.050; Eta2 (partial) = 2.29e-03, 90% CI [6.43e-08, 7.70e-03] | beta = -0.32, 95% CI [-0.68, 0.03], t(5582) = -1.80, p = 0.072; Std. beta = -0.14, 95% CI [-0.30, 0.01] | F(1) = 7.87, p = 0.005; Eta2 (partial) = 6.57e-03, 90% CI [1.12e-03, 0.02] | beta = -0.56, 95% CI [-0.96, -0.17], t(3985) = -2.78, p < .01; Std. beta = -0.25, 95% CI [-0.43, -0.07] | F(1) = 2.37, p = 0.124; Eta2 (partial) = 1.44e-03, 90% CI [0.00, 6.12e-03] | beta = -0.25, 95% CI [-0.61, 0.10], t(5497) = -1.39, p = 0.163; Std. beta = -0.11, 95% CI [-0.27, 0.05] |
| <b>EREC – Correct words (negative)</b> | <b>All</b>               | F(3) = 3.50, p = 0.015; Eta2 (partial) = 5.28e-03, 90% CI [5.68e-04, 0.01] | N/A                                                                                                        | F(3) = 0.86, p = 0.461; Eta2 (partial) = 1.31e-03, 90% CI [0.00, 3.86e-03]     | N/A                                                                                                         | F(3) = 0.76, p = 0.517; Eta2 (partial) = 1.21e-03, 90% CI [0.00, 3.67e-03]     | N/A                                                                                                     | F(3) = 0.85, p = 0.466; Eta2 (partial) = 1.37e-03, 90% CI [0.00, 4.04e-03]     | N/A                                                                                                             | F(3) = 0.74, p = 0.530; Eta2 (partial) = 1.18e-03, 90% CI [0.00, 3.60e-03]     | N/A                                                                                                     | F(3) = 1.68, p = 0.169; Eta2 (partial) = 3.78e-03, 90% CI [0.00, 9.30e-03] | N/A                                                                                                     | F(3) = 0.73, p = 0.533; Eta2 (partial) = 1.19e-03, 90% CI [0.00, 3.63e-03] | N/A                                                                                                     |
|                                        | <b>Statin vs Neither</b> | F(1) = 1.50, p = 0.220; Eta2 (partial) = 8.57e-04, 90% CI [0.00, 4.68e-03] | beta = -0.20, 95% CI [-0.53, 0.12], t(5782) = -1.23, p = 0.217; Std. beta = -0.11, 95% CI [-0.28, 0.06]    | F(1) = 0.30, p = 0.584; Eta2 (partial) = 1.72e-04, 90% CI [0.00, 2.67e-03]     | beta = 0.10, 95% CI [-0.23, 0.42], t(5773) = 0.57, p = 0.571; Std. beta = 0.05, 95% CI [-0.12, 0.23]        | F(1) = 0.85, p = 0.357; Eta2 (partial) = 5.09e-04, 90% CI [0.00, 3.93e-03]     | beta = 0.15, 95% CI [-0.19, 0.48], t(5595) = 0.85, p = 0.395; Std. beta = 0.08, 95% CI [-0.10, 0.26]    | F(1) = 0.93, p = 0.335; Eta2 (partial) = 5.61e-04, 90% CI [0.00, 4.09e-03]     | beta = 0.17, 95% CI [-0.21, 0.54], t(5529) = 0.87, p = 0.384; Std. beta = 0.09, 95% CI [-0.11, 0.29]            | F(1) = 0.85, p = 0.356; Eta2 (partial) = 5.12e-04, 90% CI [0.00, 3.94e-03]     | beta = 0.15, 95% CI [-0.19, 0.48], t(5582) = 0.85, p = 0.395; Std. beta = 0.08, 95% CI [-0.10, 0.26]    | F(1) = 0.58, p = 0.447; Eta2 (partial) = 4.88e-04, 90% CI [0.00, 4.84e-03] | beta = -0.16, 95% CI [-0.55, 0.23], t(3985) = -0.82, p = 0.415; Std. beta = -0.09, 95% CI [-0.30, 0.12] | F(1) = 0.84, p = 0.361; Eta2 (partial) = 5.09e-04, 90% CI [0.00, 3.96e-03] | beta = 0.14, 95% CI [-0.19, 0.48], t(5497) = 0.84, p = 0.399; Std. beta = 0.08, 95% CI [-0.10, 0.26]    |
|                                        | <b>BP vs Neither</b>     | F(1) = 5.86e-03, p = 0.939; Eta2 (partial) = 3.29e-06, 90% CI              | beta = 0.01, 95% CI [-0.25, 0.27], t(5782) = 0.08, p = 0.939; Std. beta =                                  | F(1) = 1.27, p = 0.259; Eta2 (partial) = 7.18e-04, 90% CI [0.00, 4.32e-03]     | beta = 0.16, 95% CI [-0.11, 0.42], t(5773) = 1.15, p = 0.252; Std. beta =                                   | F(1) = 1.05, p = 0.307; Eta2 (partial) = 6.15e-04, 90% CI [0.00, 4.17e-03]     | beta = 0.15, 95% CI [-0.12, 0.42], t(5595) = 1.07, p = 0.284; Std. beta =                               | F(1) = 1.02, p = 0.312; Eta2 (partial) = 6.04e-04, 90% CI [0.00, 4.14e-03]     | beta = 0.14, 95% CI [-0.13, 0.42], t(5529) = 1.05, p = 0.296; Std. beta =                                       | F(1) = 0.97, p = 0.326; Eta2 (partial) = 5.70e-04, 90% CI [0.00, 4.05e-03]     | beta = 0.14, 95% CI [-0.13, 0.42], t(5582) = 1.04, p = 0.300; Std. beta =                               | F(1) = 0.25, p = 0.616; Eta2 (partial) = 2.10e-04, 90% CI [0.00, 3.68e-03] | beta = 0.08, 95% CI [-0.24, 0.40], t(3985) = 0.49, p = 0.625; Std. beta =                               | F(1) = 1.33, p = 0.248; Eta2 (partial) = 7.98e-04, 90% CI [0.00, 4.67e-03] | beta = 0.17, 95% CI [-0.11, 0.44], t(5497) = 1.20, p = 0.229; Std. beta                                 |

| Outcome | Groups                 | Full dataset (n=2013)                                                      |                                                                                                         |                                                                            |                                                                                                         |                                                                            |                                                                                                         | Sensitivity Analyses                                                       |                                                                                                         |                                                                            |                                                                                                         |                                                                            |                                                                                                             |                                                                            |                                                                                                         |
|---------|------------------------|----------------------------------------------------------------------------|---------------------------------------------------------------------------------------------------------|----------------------------------------------------------------------------|---------------------------------------------------------------------------------------------------------|----------------------------------------------------------------------------|---------------------------------------------------------------------------------------------------------|----------------------------------------------------------------------------|---------------------------------------------------------------------------------------------------------|----------------------------------------------------------------------------|---------------------------------------------------------------------------------------------------------|----------------------------------------------------------------------------|-------------------------------------------------------------------------------------------------------------|----------------------------------------------------------------------------|---------------------------------------------------------------------------------------------------------|
|         |                        | Uncorrected                                                                |                                                                                                         | Corrected for demographics                                                 |                                                                                                         | Corrected for all covariates                                               |                                                                                                         | Excluding non-lipophilic (n=1991)                                          |                                                                                                         | Excluding small gender groups (n=2007)                                     |                                                                                                         | Excluding poor ECAT performance (<90%) (n=1445)                            |                                                                                                             | Excluding EREC poor performance (zero correct words) (n=1975)              |                                                                                                         |
|         |                        | ANCOVA                                                                     | Linear regression                                                                                           | ANCOVA                                                                     | Linear regression                                                                                       |
|         |                        |                                                                            |                                                                                                         |                                                                            |                                                                                                         |                                                                            |                                                                                                         |                                                                            |                                                                                                         |                                                                            |                                                                                                         |                                                                            |                                                                                                             |                                                                            |                                                                                                         |
|         |                        | [0.00, 2.24e-04]                                                           | 5.47e-03, 95% CI [-0.14, 0.15]                                                                          |                                                                            | 0.08, 95% CI [-0.06, 0.22]                                                                              |                                                                            | 0.08, 95% CI [-0.07, 0.22]                                                                              |                                                                            | 0.08, 95% CI [-0.07, 0.22]                                                                              |                                                                            | 0.08, 95% CI [-0.07, 0.22]                                                                              |                                                                            | 0.04, 95% CI [-0.13, 0.22]                                                                                  |                                                                            | = 0.09, 95% CI [-0.06, 0.24]                                                                            |
|         | <b>Both vs Neither</b> | F(1) = 9.26, p = 0.002; Eta2 (partial) = 5.22e-03, 90% CI [1.10e-03, 0.01] | beta = -0.43, 95% CI [-0.71, -0.15], t(5782) = -3.04, p < .01; Std. beta = -0.23, 95% CI [-0.38, -0.08] | F(1) = 1.33, p = 0.249; Eta2 (partial) = 7.59e-04, 90% CI [0.00, 4.45e-03] | beta = -0.12, 95% CI [-0.41, 0.17], t(5773) = -0.83, p = 0.405; Std. beta = -0.07, 95% CI [-0.22, 0.09] | F(1) = 0.57, p = 0.452; Eta2 (partial) = 3.36e-04, 90% CI [0.00, 3.38e-03] | beta = -0.08, 95% CI [-0.37, 0.22], t(5595) = -0.53, p = 0.599; Std. beta = -0.04, 95% CI [-0.20, 0.11] | F(1) = 0.80, p = 0.371; Eta2 (partial) = 4.77e-04, 90% CI [0.00, 3.82e-03] | beta = -0.11, 95% CI [-0.41, 0.19], t(5529) = -0.70, p = 0.484; Std. beta = -0.06, 95% CI [-0.22, 0.10] | F(1) = 0.57, p = 0.450; Eta2 (partial) = 3.40e-04, 90% CI [0.00, 3.40e-03] | beta = -0.08, 95% CI [-0.37, 0.21], t(5582) = -0.53, p = 0.593; Std. beta = -0.04, 95% CI [-0.20, 0.11] | F(1) = 4.30, p = 0.038; Eta2 (partial) = 3.60e-03, 90% CI [9.97e-05, 0.01] | beta = -0.35, 95% CI [-0.69, -0.01], t(3985) = -2.03, p < .05; Std. beta = -0.19, 95% CI [-0.37, -6.68e-03] | F(1) = 0.20, p = 0.657; Eta2 (partial) = 1.20e-04, 90% CI [0.00, 2.69e-04] | beta = -0.04, 95% CI [-0.34, 0.26], t(5497) = -0.23, p = 0.815; Std. beta = -0.02, 95% CI [-0.18, 0.14] |

## FERT – split by time-point

| Outcome             | Groups             | FERT split by time point – all fully corrected                                                                                                                                           |                                                                                                                     |                                                                                                                                                                                      |                                                                                                             |                                                                                                                                                                                      |                                                                                                             |
|---------------------|--------------------|------------------------------------------------------------------------------------------------------------------------------------------------------------------------------------------|---------------------------------------------------------------------------------------------------------------------|--------------------------------------------------------------------------------------------------------------------------------------------------------------------------------------|-------------------------------------------------------------------------------------------------------------|--------------------------------------------------------------------------------------------------------------------------------------------------------------------------------------|-------------------------------------------------------------------------------------------------------------|
|                     |                    | Baseline (n=2013)                                                                                                                                                                        |                                                                                                                     | Phase 2 (n=1892)                                                                                                                                                                     |                                                                                                             | Phase 3 (n=1794)                                                                                                                                                                     |                                                                                                             |
|                     |                    | ANCOVA                                                                                                                                                                                   | Linear regression                                                                                                   | ANCOVA                                                                                                                                                                               | Linear regression                                                                                           | ANCOVA                                                                                                                                                                               | Linear regression                                                                                           |
| All emotions - UBHR | All                | Group: F(3) = 2.79, p = 0.039; Eta2 (partial) = 4.45e-03, 90% CI [1.13e-04, 9.56e-03]<br><br>Interaction: F(18) = 2.78, p < .001; Eta2 (partial) = 4.39e-03, 90% CI [1.29e-03, 5.00e-03] | N/A                                                                                                                 | Group: F(3) = 4.73, p = 0.003; Eta2 (partial) = 7.53e-03, 90% CI [1.59e-03, 0.01]<br><br>Interaction: F(18) = 2.51, p < .001; Eta2 (partial) = 3.97e-03, 90% CI [9.77e-04, 4.48e-03] | N/A                                                                                                         | Group: F(3) = 1.39, p = 0.245; Eta2 (partial) = 2.40e-03, 90% CI [0.00, 6.22e-03]<br><br>Interaction: F(18) = 2.45, p < .001; Eta2 (partial) = 4.19e-03, 90% CI [9.83e-04, 4.71e-03] | N/A                                                                                                         |
| Angry - UBHR        | All                | F(3, 1869) = 6.05, p < .001; Eta2 (partial) = 9.62e-03, 90% CI [2.80e-03, 0.02]                                                                                                          | N/A                                                                                                                 | F(3, 1865) = 9.77, p < .001; Eta2 (partial) = 0.02, 90% CI [6.65e-03, 0.02]                                                                                                          | N/A                                                                                                         | F(3, 1727) = 3.00, p = 0.029; Eta2 (partial) = 5.19e-03, 90% CI [2.72e-04, 0.01]                                                                                                     | N/A                                                                                                         |
|                     | Statins vs Neither | F(1, 1650) = 15.23, p < .001; Eta2 (partial) = 9.15e-03, 90% CI [3.07e-03, 0.02]                                                                                                         | beta = -0.05, 95% CI [-0.08, -0.01], t(1869) = -2.82, p < .01; Std. beta = -0.34, 95% CI [-0.58, -0.10]             | F(1, 1643) = 12.79, p < .001; Eta2 (partial) = 7.72e-03, 90% CI [2.26e-03, 0.02]                                                                                                     | beta = -0.06, 95% CI [-0.09, -0.02], t(1865) = -3.00, p < .01; Std. beta = -0.36, 95% CI [-0.60, -0.12]     | F(1, 1513) = 3.70, p = 0.054; Eta2 (partial) = 2.44e-03, 90% CI [0.00, 8.35e-03]                                                                                                     | beta = -0.03, 95% CI [-0.07, 7.72e-03], t(1727) = -1.59, p = 0.113; Std. beta = -0.19, 95% CI [-0.43, 0.05] |
|                     | BP vs neither      | F(1, 1690) = 0.54, p = 0.461; Eta2 (partial) = 3.21e-04, 90% CI [0.00, 3.32e-03]                                                                                                         | beta = -1.00e-04, 95% CI [-0.03, 0.03], t(1869) = -7.43e-03, p = 0.994; Std. beta = -7.29e-04, 95% CI [-0.19, 0.19] | F(1, 1685) = 2.01, p = 0.156; Eta2 (partial) = 1.19e-03, 90% CI [0.00, 5.54e-03]                                                                                                     | beta = -0.01, 95% CI [-0.04, 0.01], t(1865) = -0.99, p = 0.321; Std. beta = -0.10, 95% CI [-0.29, 0.09]     | F(1, 1552) = 2.77, p = 0.096; Eta2 (partial) = 1.78e-03, 90% CI [0.00, 7.00e-03]                                                                                                     | beta = -0.03, 95% CI [-0.06, 5.35e-03], t(1727) = -1.64, p = 0.100; Std. beta = -0.16, 95% CI [-0.36, 0.03] |
|                     | Both vs neither    | F(1, 1679) = 3.66, p = 0.056; Eta2 (partial) = 2.18e-03, 90% CI [0.00, 7.49e-03]                                                                                                         | beta = -0.01, 95% CI [-0.04, 0.02], t(1869) = -0.72, p = 0.472; Std. beta = -0.08, 95% CI [-0.28, 0.13]             | F(1, 1675) = 17.24, p < .001; Eta2 (partial) = 0.01, 90% CI [3.72e-03, 0.02]                                                                                                         | beta = -0.06, 95% CI [-0.09, -0.02], t(1865) = -3.38, p < .001; Std. beta = -0.35, 95% CI [-0.56, -0.15]    | F(1, 1540) = 3.63, p = 0.057; Eta2 (partial) = 2.35e-03, 90% CI [0.00, 8.12e-03]                                                                                                     | beta = -0.03, 95% CI [-0.07, 2.64e-03], t(1727) = -1.82, p = 0.069; Std. beta = -0.20, 95% CI [-0.41, 0.02] |
| Fear - UBHR         | All                | F(3, 1869) = 5.54, p < .001; Eta2 (partial) = 8.81e-03, 90% CI [2.32e-03, 0.02]                                                                                                          | N/A                                                                                                                 | F(3, 1861) = 4.17, p = 0.006; Eta2 (partial) = 6.67e-03, 90% CI [1.12e-03, 0.01]                                                                                                     | N/A                                                                                                         | F(3, 1727) = 4.92, p = 0.002; Eta2 (partial) = 8.47e-03, 90% CI [1.90e-03, 0.02]                                                                                                     | N/A                                                                                                         |
|                     | Statin vs neither  | F(1, 1650) = 11.64, p < .001; Eta2 (partial) = 7.01e-03, 90% CI [1.88e-03, 0.02]                                                                                                         | beta = -0.05, 95% CI [-0.09, -0.02], t(1869) = -2.91, p < .01; Std. beta = -0.35, 95% CI [-0.59, -0.12]             | F(1, 1639) = 5.59, p = 0.018; Eta2 (partial) = 3.40e-03, 90% CI [3.06e-04, 9.72e-03]                                                                                                 | beta = -0.03, 95% CI [-0.06, 2.56e-03], t(1861) = -1.81, p = 0.071; Std. beta = -0.22, 95% CI [-0.46, 0.02] | F(1, 1513) = 5.89, p = 0.015; Eta2 (partial) = 3.88e-03, 90% CI [3.95e-04, 0.01]                                                                                                     | beta = -0.03, 95% CI [-0.07, 2.06e-03], t(1727) = -1.84, p = 0.066; Std. beta = -0.22, 95% CI [-0.46, 0.01] |
|                     | BP vs neither      | F(1, 1690) = 1.17, p = 0.279; Eta2 (partial) = 6.92e-04, 90% CI [0.00, 4.38e-03]                                                                                                         | beta = -0.01, 95% CI [-0.04, 0.01], t(1869) = -1.00, p = 0.315; Std. beta = -0.10, 95% CI [-0.29, 0.09]             | F(1, 1682) = 2.73, p = 0.099; Eta2 (partial) = 1.62e-03, 90% CI [0.00, 6.42e-03]                                                                                                     | beta = -0.02, 95% CI [-0.04, 0.01], t(1861) = -1.14, p = 0.254; Std. beta = -0.11, 95% CI [-0.30, 0.08]     | F(1, 1552) = 2.00, p = 0.158; Eta2 (partial) = 1.28e-03, 90% CI [0.00, 5.99e-03]                                                                                                     | beta = -0.02, 95% CI [-0.04, 0.01], t(1727) = -1.10, p = 0.271; Std. beta = -0.11, 95% CI [-0.30, 0.09]     |
|                     | Both vs neither    | F(1, 1679) = 5.05, p = 0.025; Eta2 (partial) = 3.00e-03, 90% CI [1.99e-04, 8.95e-03]                                                                                                     | beta = -0.03, 95% CI [-0.06, 2.76e-03], t(1869) = -1.79, p = 0.074; Std. beta = -0.19, 95% CI [-0.40, 0.02]         | F(1, 1672) = 5.26, p = 0.022; Eta2 (partial) = 3.14e-03, 90% CI [2.38e-04, 9.20e-03]                                                                                                 | beta = -0.02, 95% CI [-0.05, 4.22e-03], t(1861) = -1.67, p = 0.096; Std. beta = -0.18, 95% CI [-0.38, 0.03] | F(1, 1540) = 8.28, p = 0.004; Eta2 (partial) = 5.35e-03, 90% CI [9.81e-04, 0.01]                                                                                                     | beta = -0.04, 95% CI [-0.07, -5.90e-03], t(1727) = -2.35, p < .05; Std. beta = -0.25, 95% CI [-0.47, -0.04] |

| Outcome                                      | Groups                   | FERT split by time point – all fully corrected                                                                                                                                                         |                                                                                                       |                                                                                                                                                                                                       |                                                                                                          |                                                                                                                                                                                                      |                                                                                                       |
|----------------------------------------------|--------------------------|--------------------------------------------------------------------------------------------------------------------------------------------------------------------------------------------------------|-------------------------------------------------------------------------------------------------------|-------------------------------------------------------------------------------------------------------------------------------------------------------------------------------------------------------|----------------------------------------------------------------------------------------------------------|------------------------------------------------------------------------------------------------------------------------------------------------------------------------------------------------------|-------------------------------------------------------------------------------------------------------|
|                                              |                          | Baseline (n=2013)                                                                                                                                                                                      |                                                                                                       | Phase 2 (n=1892)                                                                                                                                                                                      |                                                                                                          | Phase 3 (n=1794)                                                                                                                                                                                     |                                                                                                       |
|                                              |                          | ANCOVA                                                                                                                                                                                                 | Linear regression                                                                                     | ANCOVA                                                                                                                                                                                                | Linear regression                                                                                        | ANCOVA                                                                                                                                                                                               | Linear regression                                                                                     |
| <b>Anger – misclassifications (all)</b>      | <b>All</b>               | Group: F(3, 11319) = 4.42, p = 0.004; Eta2 (partial) = 1.17e-03, 90% CI [2.20e-04, 2.25e-03]<br><br>Interaction: F(15, 11319) = 1.20, p = 0.266; Eta2 (partial) = 1.58e-03, 90% CI [0.00, 1.57e-03]    | N/A                                                                                                   | Group: F(3, 11295) = 8.89, p < .001; Eta2 (partial) = 2.35e-03, 90% CI [9.48e-04, 3.89e-03]<br><br>Interaction: F(15, 11295) = 2.92, p < .001; Eta2 (partial) = 3.86e-03, 90% CI [1.12e-03, 4.63e-03] | N/A                                                                                                      | Group: F(3, 10467) = 3.69, p = 0.011; Eta2 (partial) = 1.06e-03, 90% CI [1.34e-04, 2.12e-03]<br><br>Interaction: F(15, 10467) = 1.37, p = 0.150; Eta2 (partial) = 1.96e-03, 90% CI [0.00, 2.07e-03]  | N/A                                                                                                   |
| <b>Anger – misclassifications (surprise)</b> | <b>Statin vs neither</b> | F(1, 1650) = 1.51, p = 0.220; Eta2 (partial) = 9.12e-04, 90% CI [0.00, 4.98e-03]                                                                                                                       | beta = 0.08, 95% CI [-0.06, 0.22], t(1650) = 1.08, p = 0.281; Std. beta = 0.13, 95% CI [-0.11, 0.37]  | F(1, 1643) = 2.08, p = 0.150; Eta2 (partial) = 1.26e-03, 90% CI [0.00, 5.77e-03]                                                                                                                      | beta = 0.14, 95% CI [0.01, 0.26], t(1643) = 2.17, p < .05; Std. beta = 0.26, 95% CI [0.03, 0.50]         | F(1, 1513) = 9.71, p = 0.002; Eta2 (partial) = 6.38e-03, 90% CI [1.42e-03, 0.01]                                                                                                                     | beta = 0.29, 95% CI [0.15, 0.43], t(1513) = 4.12, p < .001; Std. beta = 0.50, 95% CI [0.26, 0.74]     |
| <b>Fear – misclassifications (all)</b>       | <b>All</b>               | Group: F(3, 11319) = 2.98, p = 0.030; Eta2 (partial) = 7.90e-04, 90% CI [4.01e-05, 1.68e-03]<br><br>Interaction: F(15, 11319) = 3.23, p < .001; Eta2 (partial) = 4.26e-03, 90% CI [1.41e-03, 8.06e-03] | N/A                                                                                                   | Group: F(3, 11295) = 2.87, p = 0.035; Eta2 (partial) = 7.61e-04, 90% CI [2.73e-05, 1.63e-03]<br><br>Interaction: F(15, 11295) = 0.81, p = 0.667; Eta2 (partial) = 1.07e-03, 90% CI [0.00, 7.84e-04]   | N/A                                                                                                      | Group: F(3, 10467) = 4.78, p = 0.002; Eta2 (partial) = 1.37e-03, 90% CI [2.94e-04, 2.58e-03]<br><br>Interactions: F(15, 10467) = 1.20, p = 0.264; Eta2 (partial) = 1.71e-03, 90% CI [0.00, 1.70e-03] | N/A                                                                                                   |
| <b>Fear – misclassifications (surprise)</b>  | <b>Statin vs neither</b> | F(1, 1650) = 0.25, p = 0.618; Eta2 (partial) = 1.50e-04, 90% CI [0.00, 2.66e-03]                                                                                                                       | beta = 1.19, 95% CI [0.09, 2.29], t(1650) = 2.11, p < .05; Std. beta = 0.25, 95% CI [0.02, 0.49]      | F(1, 1643) = 0.61, p = 0.434; Eta2 (partial) = 3.72e-04, 90% CI [0.00, 3.55e-03]                                                                                                                      | beta = 0.85, 95% CI [-0.19, 1.88], t(1643) = 1.60, p = 0.109; Std. beta = 0.19, 95% CI [-0.04, 0.43]     | F(1, 1513) = 0.67, p = 0.414; Eta2 (partial) = 4.40e-04, 90% CI [0.00, 3.97e-03]                                                                                                                     | beta = 0.72, 95% CI [-0.21, 1.64], t(1513) = 1.52, p = 0.129; Std. beta = 0.19, 95% CI [-0.05, 0.43]  |
| <b>All emotions - RT</b>                     | <b>All</b>               | Group: F(3) = 1.96, p = 0.119; Eta2 (partial) = 3.13e-03, 90% CI [0.00, 7.39e-03]<br><br>Interaction: F(18) = 3.12, p < .001; Eta2 (partial) = 4.94e-03, 90% CI [1.70e-03, 5.69e-03]                   | N/A                                                                                                   | Group: F(3) = 0.81, p = 0.488; Eta2 (partial) = 1.30e-03, 90% CI [0.00, 2.92e-03]<br><br>Interaction: F(18) = 2.70, p < .001; Eta2 (partial) = 4.28e-03, 90% CI [1.20e-03, 4.87e-03]                  | N/A                                                                                                      | Group: F(3) = 1.61, p = 0.185; Eta2 (partial) = 2.79e-03, 90% CI [0.00, 6.95e-03]<br><br>Interaction: F(18) = 2.20, p = 0.002; Eta2 (partial) = 3.76e-03, 90% CI [6.75e-04, 4.16e-03]                | N/A                                                                                                   |
| <b>Anger - RT</b>                            | <b>Statin vs neither</b> | F(1, 1649) = 43.20, p < .001; Eta2 (partial) = 0.03, 90% CI [0.01, 0.04]                                                                                                                               | beta = 148.35, 95% CI [50.87, 245.84], t(1649) = 2.98, p < .01; Std. beta = 0.34, 95% CI [0.12, 0.56] | F(1, 1642) = 18.68, p < .001; Eta2 (partial) = 0.01, 90% CI [4.33e-03, 0.02]                                                                                                                          | beta = 91.08, 95% CI [-11.87, 194.02], t(1642) = 1.74, p = 0.083; Std. beta = 0.20, 95% CI [-0.03, 0.43] | F(1, 1513) = 23.10, p < .001; Eta2 (partial) = 0.02, 90% CI [6.54e-03, 0.03]                                                                                                                         | beta = 119.98, 95% CI [25.93, 214.03], t(1513) = 2.50, p < .05; Std. beta = 0.30, 95% CI [0.06, 0.53] |



# Interactions with age and gender

## FERT

| Outcome             | Interaction with Age                                                                                                               |                                                                                                                                                                                                                                                                                                                                                                                                                                                                                      | Interaction with Gender                                                                                                               |                                                                                                                                                                                                                                                                                                                                                                                                                                                                 |
|---------------------|------------------------------------------------------------------------------------------------------------------------------------|--------------------------------------------------------------------------------------------------------------------------------------------------------------------------------------------------------------------------------------------------------------------------------------------------------------------------------------------------------------------------------------------------------------------------------------------------------------------------------------|---------------------------------------------------------------------------------------------------------------------------------------|-----------------------------------------------------------------------------------------------------------------------------------------------------------------------------------------------------------------------------------------------------------------------------------------------------------------------------------------------------------------------------------------------------------------------------------------------------------------|
|                     | ANCOVA                                                                                                                             | Linear regression                                                                                                                                                                                                                                                                                                                                                                                                                                                                    | ANCOVA                                                                                                                                | Linear regression                                                                                                                                                                                                                                                                                                                                                                                                                                               |
| All emotions - UBHR | Three way interaction (emotion, group, age):<br>F(18) = 2.26, p = 0.002; Eta2 (partial) = 1.08e-03,<br>90% CI [2.10e-04, 1.20e-03] | N/A                                                                                                                                                                                                                                                                                                                                                                                                                                                                                  | Three way interaction (emotion, group, gender):<br>F(24) = 1.56, p = 0.039; Eta2 (partial) = 9.93e-04,<br>90% CI [1.94e-05, 9.06e-04] | N/A                                                                                                                                                                                                                                                                                                                                                                                                                                                             |
| Angry - UBHR        | Interaction (age and group): F(3) = 1.66, p =<br>0.173; Eta2 (partial) = 2.68e-03, 90% CI [0.00,<br>6.61e-03]                      | Interaction (both medications): beta = -3.51e-03,<br>95% CI [-6.94e-03, -7.83e-05], t(5502) = -2.00, p <<br>.05; Std. beta = -0.32, 95% CI [-0.63, -7.06e-03]<br><br>Interaction (bp med): beta = -7.49e-04, 95% CI [-<br>2.74e-03, 1.24e-03], t(5502) = -0.74, p = 0.461;<br>Std. beta = -0.07, 95% CI [-0.25, 0.11]<br><br>Interaction (statin): beta = -1.08e-03, 95% CI [-<br>3.71e-03, 1.55e-03], t(5502) = -0.81, p = 0.420;<br>Std. beta = -0.10, 95% CI [-0.33, 0.14]        | Interaction (gender and group): F(4) = 1.03, p =<br>0.391; Eta2 (partial) = 2.21e-03, 90% CI [0.00,<br>5.01e-03]                      | Interaction effect (male, both medications): beta<br>= 0.02, 95% CI [-0.03, 0.07], t(5501) = 0.76, p =<br>0.446; Std. beta = 0.12, 95% CI [-0.20, 0.44]<br><br>Interaction (male, bp med): beta = -0.03, 95% CI<br>[-0.07, 0.02], t(5501) = -1.05, p = 0.295; Std. beta<br>= -0.16, 95% CI [-0.47, 0.14]<br><br>Interaction (male, statin): beta = -0.03, 95% CI [-<br>0.09, 0.03], t(5501) = -1.04, p = 0.298; Std. beta =<br>-0.20, 95% CI [-0.58, 0.18]      |
| Disgust - UBHR      | Interaction (age and group): F(3) = 0.86, p =<br>0.460; Eta2 (partial) = 1.40e-03, 90% CI [0.00,<br>4.13e-03]                      | Interaction (both medications): beta = 4.58e-04,<br>95% CI [-2.25e-03, 3.17e-03], t(5502) = 0.33, p =<br>0.740; Std. beta = 0.05, 95% CI [-0.24, 0.33]<br><br>Interaction (bp med): beta = 1.03e-03, 95% CI [-<br>5.42e-04, 2.61e-03], t(5502) = 1.29, p = 0.199;<br>Std. beta = 0.11, 95% CI [-0.06, 0.27]<br><br>Interaction (statin): beta = -9.21e-04, 95% CI [-<br>3.00e-03, 1.16e-03], t(5502) = -0.87, p = 0.386;<br>Std. beta = -0.10, 95% CI [-0.32, 0.12]                  | Interaction (gender and group): F(4) = 0.46, p =<br>0.767; Eta2 (partial) = 9.94e-04, 90% CI [0.00,<br>2.27e-03]                      | Interaction effect (male, both medications): beta<br>= 0.02, 95% CI [-0.02, 0.06], t(5501) = 1.02, p =<br>0.309; Std. beta = 0.15, 95% CI [-0.14, 0.45]<br><br>Interaction (male, bp med): beta = -0.01, 95% CI<br>[-0.05, 0.03], t(5501) = -0.63, p = 0.529; Std. beta<br>= -0.09, 95% CI [-0.37, 0.19]<br><br>Interaction (male, statin): beta = -4.87e-03, 95%<br>CI [-0.05, 0.04], t(5501) = -0.20, p = 0.840; Std.<br>beta = -0.04, 95% CI [-0.39, 0.32]   |
| Fear - UBHR         | Interaction (age and group): F(3) = 0.60, p =<br>0.612; Eta2 (partial) = 9.71e-04, 90% CI [0.00,<br>3.10e-03]                      | Interaction effect (both medications): beta = -<br>1.82e-03, 95% CI [-5.08e-03, 1.44e-03], t(5498) =<br>-1.10, p = 0.273; Std. beta = -0.18, 95% CI [-0.50,<br>0.14]<br><br>Interaction (bp med): beta = -7.27e-04, 95% CI [-<br>2.62e-03, 1.17e-03], t(5498) = -0.75, p = 0.452;<br>Std. beta = -0.07, 95% CI [-0.26, 0.11]<br><br>Interaction (statin): beta = -4.89e-04, 95% CI [-<br>2.99e-03, 2.01e-03], t(5498) = -0.38, p = 0.701;<br>Std. beta = -0.05, 95% CI [-0.29, 0.20] | Interaction (gender and group): F(4) = 1.69, p =<br>0.151; Eta2 (partial) = 3.61e-03, 90% CI [0.00,<br>7.52e-03]                      | Interaction effect (male, both medications): beta<br>= 0.03, 95% CI [-0.02, 0.07], t(5497) = 1.06, p =<br>0.287; Std. beta = 0.18, 95% CI [-0.15, 0.51]<br><br>Interaction (male, bp med): beta = 2.31e-03, 95%<br>CI [-0.04, 0.05], t(5497) = 0.10, p = 0.921; Std.<br>beta = 0.02, 95% CI [-0.30, 0.33]<br><br>Interaction (male, statin): beta = -0.07, 95% CI [-<br>0.12, -9.91e-03], t(5497) = -2.30, p < .05; Std.<br>beta = -0.46, 95% CI [-0.86, -0.07] |
| Happiness - UBHR    | Interaction (age and group): F(3) = 3.88, p =<br>0.009; Eta2 (partial) = 6.32e-03, 90% CI [9.12e-04,<br>0.01]                      | Interaction effect (both medications): beta = -<br>8.39e-04, 95% CI [-3.03e-03, 1.35e-03], t(5502) =<br>-0.75, p = 0.453; Std. beta = -0.11, 95% CI [-0.39,<br>0.17]                                                                                                                                                                                                                                                                                                                 | Interaction (gender and group): F(4) = 0.45, p =<br>0.773; Eta2 (partial) = 9.81e-04, 90% CI [0.00,<br>2.23e-03]                      | Interaction effect (male, both medications): beta<br>= -7.47e-03, 95% CI [-0.04, 0.02], t(5501) = -0.46,<br>p = 0.649; Std. beta = -0.07, 95% CI [-0.36, 0.23]                                                                                                                                                                                                                                                                                                  |

| Outcome           | Interaction with Age                                                                                                         |                                                                                                                                                                                                                                                                                                                                                                                                                                                                  | Interaction with Gender                                                                                                         |                                                                                                                                                                                                                                                                                                                                                                                                                                                         |
|-------------------|------------------------------------------------------------------------------------------------------------------------------|------------------------------------------------------------------------------------------------------------------------------------------------------------------------------------------------------------------------------------------------------------------------------------------------------------------------------------------------------------------------------------------------------------------------------------------------------------------|---------------------------------------------------------------------------------------------------------------------------------|---------------------------------------------------------------------------------------------------------------------------------------------------------------------------------------------------------------------------------------------------------------------------------------------------------------------------------------------------------------------------------------------------------------------------------------------------------|
|                   | ANCOVA                                                                                                                       | Linear regression                                                                                                                                                                                                                                                                                                                                                                                                                                                | ANCOVA                                                                                                                          | Linear regression                                                                                                                                                                                                                                                                                                                                                                                                                                       |
|                   |                                                                                                                              | <p>Interaction (bp med): beta = -8.57e-05, 95% CI [-1.36e-03, 1.19e-03], t(5502) = -0.13, p = 0.895; Std. beta = -0.01, 95% CI [-0.18, 0.15]</p> <p>Interaction (statin): beta = -2.87e-03, 95% CI [-4.55e-03, -1.19e-03], t(5502) = -3.34, p &lt; .001; Std. beta = -0.37, 95% CI [-0.59, -0.15]</p>                                                                                                                                                            |                                                                                                                                 | <p>Interaction (male, bp med): beta = -9.09e-03, 95% CI [-0.04, 0.02], t(5501) = -0.58, p = 0.562; Std. beta = -0.08, 95% CI [-0.36, 0.20]</p> <p>Interaction (male, statin): beta = -0.02, 95% CI [-0.06, 0.02], t(5501) = -1.18, p = 0.237; Std. beta = -0.21, 95% CI [-0.56, 0.14]</p>                                                                                                                                                               |
| Sadness - UBHR    | Interaction (age and group): F(3) = 1.54, p = 0.202; Eta2 (partial) = 2.49e-03, 90% CI [0.00, 6.28e-03]                      | <p>Interaction effect (both medications): beta = 1.47e-03, 95% CI [-1.34e-03, 4.28e-03], t(5502) = 1.02, p = 0.306; Std. beta = 0.14, 95% CI [-0.13, 0.41]</p> <p>Interaction (bp med): beta = -4.81e-04, 95% CI [-2.11e-03, 1.15e-03], t(5502) = -0.58, p = 0.564; Std. beta = -0.05, 95% CI [-0.20, 0.11]</p> <p>Interaction (statin): beta = -1.96e-03, 95% CI [-4.12e-03, 1.92e-04], t(5502) = -1.79, p = 0.074; Std. beta = -0.19, 95% CI [-0.40, 0.02]</p> | Interaction (gender and group): F(4) = 1.85, p = 0.116; Eta2 (partial) = 3.99e-03, 90% CI [0.00, 8.18e-03]                      | <p>Interaction effect (male, both medications): beta = 0.02, 95% CI [-0.02, 0.06], t(5501) = 0.94, p = 0.350; Std. beta = 0.13, 95% CI [-0.15, 0.42]</p> <p>Interaction (male, bp med): beta = 4.12e-03, 95% CI [-0.04, 0.04], t(5501) = 0.21, p = 0.837; Std. beta = 0.03, 95% CI [-0.24, 0.30]</p> <p>Interaction (male, statin): beta = -0.05, 95% CI [-0.10, -1.69e-03], t(5501) = -2.03, p &lt; .05; Std. beta = -0.35, 95% CI [-0.68, -0.01]</p>  |
| Surprise - UBHR   | Interaction (age and group): F(3) = 0.33, p = 0.803; Eta2 (partial) = 5.40e-04, 90% CI [0.00, 1.82e-03]                      | <p>Interaction effect (both medications): beta = 5.03e-04, 95% CI [-1.84e-03, 2.85e-03], t(5502) = 0.42, p = 0.674; Std. beta = 0.06, 95% CI [-0.22, 0.34]</p> <p>Interaction (bp med): beta = 6.25e-04, 95% CI [-7.37e-04, 1.99e-03], t(5502) = 0.90, p = 0.369; Std. beta = 0.07, 95% CI [-0.09, 0.24]</p> <p>Interaction (statin): beta = -1.32e-04, 95% CI [-1.93e-03, 1.67e-03], t(5502) = -0.14, p = 0.886; Std. beta = -0.02, 95% CI [-0.23, 0.20]</p>    | Interaction (gender and group): F(4) = 0.15, p = 0.962; Eta2 (partial) = 3.34e-04, 90% CI [0.00, 0.00]                          | <p>Interaction effect (male, both medications): beta = 6.97e-03, 95% CI [-0.03, 0.04], t(5501) = 0.40, p = 0.690; Std. beta = 0.06, 95% CI [-0.23, 0.35]</p> <p>Interaction (male, bp med): beta = -7.08e-03, 95% CI [-0.04, 0.03], t(5501) = -0.42, p = 0.672; Std. beta = -0.06, 95% CI [-0.34, 0.22]</p> <p>Interaction (male, statin): beta = 8.95e-03, 95% CI [-0.03, 0.05], t(5501) = 0.43, p = 0.668; Std. beta = 0.08, 95% CI [-0.27, 0.42]</p> |
| All emotions - RT | Three way interaction (emotion, group, age): F(18) = 1.90, p = 0.012; Eta2 (partial) = 9.29e-04, 90% CI [9.25e-05, 9.97e-04] | N/A                                                                                                                                                                                                                                                                                                                                                                                                                                                              | Three way interaction (emotion, group, gender): F(24) = 1.63, p = 0.027; Eta2 (partial) = 1.06e-03, 90% CI [4.89e-05, 9.88e-04] | N/A                                                                                                                                                                                                                                                                                                                                                                                                                                                     |
| Anger - RT        | Interaction (age and group): F(1) = 1.58e-03, p = 0.968; Eta2 (partial) = 9.61e-07, 90% CI [0.00, 0.00]                      | Interaction (statin): beta = 0.15, 95% CI [-7.48, 7.79], t(4848) = 0.04, p = 0.968; Std. beta = 4.95e-03, 95% CI [-0.24, 0.25]                                                                                                                                                                                                                                                                                                                                   | Interaction (gender and group): F(1) = 0.36, p = 0.549; Eta2 (partial) = 2.17e-04, 90% CI [0.00, 2.97e-03]                      | Interaction (male, statin): beta = 53.00, 95% CI [-120.29, 226.29], t(4848) = 0.60, p = 0.549; Std. beta = 0.12, 95% CI [-0.28, 0.52]                                                                                                                                                                                                                                                                                                                   |
| Disgust - RT      | Interaction (age and group): F(1) = 0.12, p = 0.734; Eta2 (partial) = 7.04e-05, 90% CI [0.00, 2.11e-03]                      | Interaction (statin): beta = -1.27, 95% CI [-8.59, 6.05], t(4848) = -0.34, p = 0.734; Std. beta = -0.04, 95% CI [-0.29, 0.20]                                                                                                                                                                                                                                                                                                                                    | Interaction (gender and group): F(1) = 0.05, p = 0.824; Eta2 (partial) = 2.98e-05, 90% CI [0.00, 1.54e-03]                      | Interaction (male, statin): beta = -18.85, 95% CI [-184.94, 147.24], t(4848) = -0.22, p = 0.824; Std. beta = -0.05, 95% CI [-0.44, 0.35]                                                                                                                                                                                                                                                                                                                |
| Fear - RT         | Interaction (age and group): F(1) = 0.31, p = 0.576; Eta2 (partial) = 1.90e-04, 90% CI [0.00, 2.87e-03]                      | Interaction (statin): beta = -2.48, 95% CI [-11.16, 6.21], t(4812) = -0.56, p = 0.576; Std. beta = -0.07, 95% CI [-0.30, 0.17]                                                                                                                                                                                                                                                                                                                                   | Interaction (gender and group): F(1) = 0.44, p = 0.507; Eta2 (partial) = 2.64e-04, 90% CI [0.00, 3.14e-03]                      | Interaction (male, statin): beta = 67.05, 95% CI [-130.77, 264.87], t(4812) = 0.66, p = 0.506; Std. beta = 0.13, 95% CI [-0.25, 0.51]                                                                                                                                                                                                                                                                                                                   |
| Happiness - RT    | Interaction (age and group): F(1) = 0.35, p = 0.552; Eta2 (partial) = 2.16e-04, 90% CI [0.00, 2.98e-03]                      | Interaction (statin): beta = -1.66, 95% CI [-7.11, 3.80], t(4850) = -0.60, p = 0.552; Std. beta = -0.08, 95% CI [-0.33, 0.18]                                                                                                                                                                                                                                                                                                                                    | Interaction (gender and group): F(1) = 2.21, p = 0.137; Eta2 (partial) = 1.34e-03, 90% CI [0.00, 5.90e-03]                      | Interaction (male, statin): beta = 93.96, 95% CI [-29.79, 217.71], t(4850) = 1.49, p = 0.137; Std. beta = 0.31, 95% CI [-0.10, 0.73]                                                                                                                                                                                                                                                                                                                    |
| Sadness - RT      | Interaction (age and group): F(1) = 0.94, p = 0.331; Eta2 (partial) = 5.75e-04, 90% CI [0.00, 4.15e-03]                      | Interaction (statin): beta = 3.21, 95% CI [-3.26, 9.68], t(4849) = 0.97, p = 0.331; Std. beta = 0.12, 95% CI [-0.12, 0.36]                                                                                                                                                                                                                                                                                                                                       | Interaction (gender and group): F(1) = 1.49, p = 0.223; Eta2 (partial) = 8.95e-04, 90% CI [0.00, 4.92e-03]                      | Interaction (male, statin): beta = 91.36, 95% CI [-55.56, 238.28], t(4849) = 1.22, p = 0.223; Std. beta = 0.24, 95% CI [-0.15, 0.63]                                                                                                                                                                                                                                                                                                                    |

| Outcome       | Interaction with Age                                                                                        |                                                                                                                                   | Interaction with Gender                                                                                    |                                                                                                                                       |
|---------------|-------------------------------------------------------------------------------------------------------------|-----------------------------------------------------------------------------------------------------------------------------------|------------------------------------------------------------------------------------------------------------|---------------------------------------------------------------------------------------------------------------------------------------|
|               | ANCOVA                                                                                                      | Linear regression                                                                                                                 | ANCOVA                                                                                                     | Linear regression                                                                                                                     |
| Surprise - RT | Interaction (age and group): F(1) = 1.34e-03, p = 0.971; Eta2 (partial) = 8.15e-07, 90% CI [0.00, 0.00]     | Interaction (statin): beta = 0.13, 95% CI [-6.63, 6.89], t(4850) = 0.04, p = 0.971; Std. beta = 4.65e-03, 95% CI [-0.24, 0.25]    | Interaction (gender and group): F(1) = 1.69, p = 0.193; Eta2 (partial) = 1.02e-03, 90% CI [0.00, 5.20e-03] | Interaction (male, statin): beta = 101.79, 95% CI [-51.50, 255.08], t(4850) = 1.30, p = 0.193; Std. beta = 0.27, 95% CI [-0.14, 0.68] |
| Neutral - RT  | Interaction (age and group): F(1) = 5.12e-03, p = 0.943; Eta2 (partial) = 3.15e-06, 90% CI [0.00, 1.62e-04] | Interaction (statin): beta = -0.22, 95% CI [-6.37, 5.92], t(4847) = -0.07, p = 0.943; Std. beta = -8.68e-03, 95% CI [-0.25, 0.23] | Interaction (gender and group): F(1) = 0.14, p = 0.709; Eta2 (partial) = 8.45e-05, 90% CI [0.00, 2.24e-03] | Interaction (male, statin): beta = 26.53, 95% CI [-112.97, 166.04], t(4847) = 0.37, p = 0.709; Std. beta = 0.07, 95% CI [-0.32, 0.46] |

PILT

| Outcome                                       | Interaction with Age                                                                                          |                                                                                                                                                                                                                                                                                                                                                                                                                               | Interaction with Gender                                                                                          |                                                                                                                                                                                                                                                                                                                                                                                                                           |
|-----------------------------------------------|---------------------------------------------------------------------------------------------------------------|-------------------------------------------------------------------------------------------------------------------------------------------------------------------------------------------------------------------------------------------------------------------------------------------------------------------------------------------------------------------------------------------------------------------------------|------------------------------------------------------------------------------------------------------------------|---------------------------------------------------------------------------------------------------------------------------------------------------------------------------------------------------------------------------------------------------------------------------------------------------------------------------------------------------------------------------------------------------------------------------|
|                                               | ANCOVA                                                                                                        | Linear regression                                                                                                                                                                                                                                                                                                                                                                                                             | ANCOVA                                                                                                           | Linear regression                                                                                                                                                                                                                                                                                                                                                                                                         |
| Gain trials - choice of advantageous stimulus | Interaction (age and group): F(3, 1607) = 1.96, p = 0.118; Eta2 (partial) = 3.65e-03, 90% CI [0.00, 8.61e-03] | Interaction effect (both medications): beta = -0.34, 95% CI [-0.89, 0.21], t(1607) = -1.20, p = 0.230; Std. beta = -0.25, 95% CI [-0.67, 0.16]<br><br>Interaction (bp med): beta = -0.33, 95% CI [-0.65, -5.00e-03], t(1607) = -1.99, p < .05; Std. beta = -0.24, 95% CI [-0.49, -3.75e-03]<br><br>Interaction (statin): beta = 0.17, 95% CI [-0.29, 0.62], t(1607) = 0.72, p = 0.474; Std. beta = 0.12, 95% CI [-0.22, 0.46] | Interaction (gender and group): F(3, 1607) = 0.36, p = 0.785; Eta2 (partial) = 6.63e-04, 90% CI [0.00, 2.24e-03] | Interaction (male, both): beta = -3.49, 95% CI [-11.67, 4.68], t(1607) = -0.84, p = 0.402; Std. beta = -0.19, 95% CI [-0.62, 0.25]<br><br>Interaction (male, BP med): beta = -1.47, 95% CI [-9.08, 6.13], t(1607) = -0.38, p = 0.704; Std. beta = -0.08, 95% CI [-0.48, 0.33]<br><br>Interaction (male, statin): beta = -2.76, 95% CI [-12.22, 6.71], t(1607) = -0.57, p = 0.568; Std. beta = -0.15, 95% CI [-0.65, 0.36] |
| Loss trials - choice of advantageous stimulus | Interaction (age and group): F(3, 1607) = 0.45, p = 0.714; Eta2 (partial) = 8.48e-04, 90% CI [0.00, 2.83e-03] | Interaction effect (both medications): beta = -0.15, 95% CI [-0.57, 0.27], t(1607) = -0.70, p = 0.483; Std. beta = -0.15, 95% CI [-0.55, 0.26]<br><br>Interaction (bp med): beta = 0.08, 95% CI [-0.16, 0.32], t(1607) = 0.64, p = 0.521; Std. beta = 0.08, 95% CI [-0.16, 0.32]<br><br>Interaction (statin): beta = 0.11, 95% CI [-0.23, 0.46], t(1607) = 0.65, p = 0.514; Std. beta = 0.11, 95% CI [-0.22, 0.45]            | Interaction (gender and group): F(3, 1607) = 1.24, p = 0.294; Eta2 (partial) = 2.31e-03, 90% CI [0.00, 6.18e-03] | Interaction (male, both): beta = -4.20, 95% CI [-10.39, 2.00], t(1607) = -1.33, p = 0.184; Std. beta = -0.29, 95% CI [-0.72, 0.14]<br><br>Interaction (male, BP med): beta = -4.32, 95% CI [-10.09, 1.44], t(1607) = -1.47, p = 0.142; Std. beta = -0.30, 95% CI [-0.70, 0.10]<br><br>Interaction (male, statin): beta = 0.25, 95% CI [-6.93, 7.42], t(1607) = 0.07, p = 0.946; Std. beta = 0.02, 95% CI [-0.48, 0.51]    |

N-back

| Outcome                                         | Interaction with Age                                                                                             |                                                                                                                                                                                                                                                                                                                                                                                                                          | Interaction with Gender                                                                                          |                                                                                                                                                                                                                                                                                                                                                                                                                        |
|-------------------------------------------------|------------------------------------------------------------------------------------------------------------------|--------------------------------------------------------------------------------------------------------------------------------------------------------------------------------------------------------------------------------------------------------------------------------------------------------------------------------------------------------------------------------------------------------------------------|------------------------------------------------------------------------------------------------------------------|------------------------------------------------------------------------------------------------------------------------------------------------------------------------------------------------------------------------------------------------------------------------------------------------------------------------------------------------------------------------------------------------------------------------|
|                                                 | ANCOVA                                                                                                           | Linear regression                                                                                                                                                                                                                                                                                                                                                                                                        | ANCOVA                                                                                                           | Linear regression                                                                                                                                                                                                                                                                                                                                                                                                      |
| <b>Hits– All test conditions</b>                | Interaction (age and group):<br>F(6) = 1.66, p = 0.126; Eta2 (partial) = 2.88e-03, 90% CI [0.00, 6.45e-03]       | N/A                                                                                                                                                                                                                                                                                                                                                                                                                      | Interaction (gender and group): F(8) = 0.35, p = 0.945; Eta2 (partial) = 8.20e-04, 90% CI [0.00, 8.57e-05]       | N/A                                                                                                                                                                                                                                                                                                                                                                                                                    |
| <b>Hits – One back</b>                          | Interaction (age and group):<br>F(3, 1706) = 0.97, p = 0.408; Eta2 (partial) = 1.70e-03, 90% CI [0.00, 4.85e-03] | Interaction effect (both medications): beta = -0.46, 95% CI [-1.20, 0.28], t(1706) = -1.23, p = 0.220; Std. beta = -0.24, 95% CI [-0.63, 0.14]<br><br>Interaction (bp med): beta = -0.21, 95% CI [-0.65, 0.22], t(1706) = -0.96, p = 0.336; Std. beta = -0.11, 95% CI [-0.34, 0.12]<br><br>Interaction (statin): beta = -0.24, 95% CI [-0.80, 0.33], t(1706) = -0.82, p = 0.412; Std. beta = -0.12, 95% CI [-0.42, 0.17] | Interaction (gender and group): F(4, 1705) = 0.05, p = 0.995; Eta2 (partial) = 1.26e-04, 90% CI [0.00, 0.00]     | Interaction (male, both): beta = 0.49, 95% CI [-10.46, 11.45], t(1705) = 0.09, p = 0.930; Std. beta = 0.02, 95% CI [-0.39, 0.43]<br><br>Interaction (male, BP med): beta = 0.65, 95% CI [-9.63, 10.92], t(1705) = 0.12, p = 0.902; Std. beta = 0.02, 95% CI [-0.36, 0.41]<br><br>Interaction (male, statin): beta = -2.65, 95% CI [-15.57, 10.27], t(1705) = -0.40, p = 0.688; Std. beta = -0.10, 95% CI [-0.58, 0.39] |
| <b>Hits – Two back</b>                          | Interaction (age and group):<br>F(3, 1706) = 1.83, p = 0.140; Eta2 (partial) = 3.20e-03, 90% CI [0.00, 7.71e-03] | Interaction effect (both medications): beta = -0.09, 95% CI [-0.67, 0.50], t(1706) = -0.30, p = 0.767; Std. beta = -0.06, 95% CI [-0.45, 0.33]<br><br>Interaction (bp med): beta = -0.05, 95% CI [-0.39, 0.30], t(1706) = -0.27, p = 0.789; Std. beta = -0.03, 95% CI [-0.26, 0.20]<br><br>Interaction (statin): beta = -0.53, 95% CI [-0.98, -0.08], t(1706) = -2.32, p < .05; Std. beta = -0.35, 95% CI [-0.65, -0.05] | Interaction (gender and group): F(4, 1705) = 0.20, p = 0.940; Eta2 (partial) = 4.62e-04, 90% CI [0.00, 2.47e-04] | Interaction (male, both): beta = 0.54, 95% CI [-8.16, 9.24], t(1705) = 0.12, p = 0.903; Std. beta = 0.03, 95% CI [-0.39, 0.44]<br><br>Interaction (male, BP med): beta = 3.64, 95% CI [-4.53, 11.80], t(1705) = 0.87, p = 0.383; Std. beta = 0.17, 95% CI [-0.21, 0.56]<br><br>Interaction (male, statin): beta = -0.30, 95% CI [-10.57, 9.97], t(1705) = -0.06, p = 0.954; Std. beta = -0.01, 95% CI [-0.50, 0.47]    |
| <b>Hits – Three back</b>                        | Interaction (age and group):<br>F(3, 1706) = 0.58, p = 0.629; Eta2 (partial) = 1.02e-03, 90% CI [0.00, 2.28e-03] | Interaction effect (both medications): beta = -0.30, 95% CI [-0.85, 0.25], t(1706) = -1.08, p = 0.282; Std. beta = -0.21, 95% CI [-0.60, 0.17]<br><br>Interaction (bp med): beta = 0.10, 95% CI [-0.22, 0.43], t(1706) = 0.64, p = 0.525; Std. beta = 0.07, 95% CI [-0.15, 0.30]<br><br>Interaction (statin): beta = 0.07, 95% CI [-0.35, 0.49], t(1706) = 0.33, p = 0.741; Std. beta = 0.05, 95% CI [-0.25, 0.35]       | Interaction (gender and group): F(4, 1705) = 0.86, p = 0.488; Eta2 (partial) = 2.01e-03, 90% CI [0.00, 4.66e-03] | Interaction (male, both): beta = -2.03, 95% CI [-10.15, 6.10], t(1705) = -0.49, p = 0.625; Std. beta = -0.10, 95% CI [-0.51, 0.31]<br><br>Interaction (male, BP med): beta = 1.64, 95% CI [-5.98, 9.27], t(1705) = 0.42, p = 0.673; Std. beta = 0.08, 95% CI [-0.30, 0.47]<br><br>Interaction (male, statin): beta = -7.86, 95% CI [-17.45, 1.73], t(1705) = -1.61, p = 0.108; Std. beta = -0.40, 95% CI [-0.88, 0.09] |
| <b>False alarms – All test conditions</b>       | Interaction (age and group): F(6) = 0.56, p = 0.766; Eta2 (partial) = 9.64e-04, 90% CI [0.00, 2.16e-03]          | N/A                                                                                                                                                                                                                                                                                                                                                                                                                      | Interaction (gender and group): F(8) = 0.38, p = 0.934; Eta2 (partial) = 8.71e-04, 90% CI [0.00, 2.24e-04]       | N/A                                                                                                                                                                                                                                                                                                                                                                                                                    |
| <b>Correct rejections – All test conditions</b> | Interaction (age and group):<br>F(6) = 1.74, p = 0.108; Eta2 (partial) = 3.01e-03, 90% CI [0.00, 5.06e-03]       | N/A                                                                                                                                                                                                                                                                                                                                                                                                                      | Interaction (gender and group): F(8) = 0.44, p = 0.899; Eta2 (partial) = 1.02e-03, 90% CI [0.00, 6.03e-04]       | N/A                                                                                                                                                                                                                                                                                                                                                                                                                    |
| <b>Misses – All test conditions</b>             | Interaction (age and group):<br>F(6) = 0.68, p = 0.670; Eta2 (partial) = 1.17e-03, 90% CI [0.00, 1.85e-03]       | N/A                                                                                                                                                                                                                                                                                                                                                                                                                      | Interaction (gender and group): F(8) = 0.81, p = 0.591; Eta2 (partial) = 1.88e-03, 90% CI [0.00, 2.41e-03]       | N/A                                                                                                                                                                                                                                                                                                                                                                                                                    |
| <b>Misses – One back</b>                        | Interaction (age and group):<br>F(3, 1706) = 1.94, p = 0.122;                                                    | Interaction effect (both medications): beta = 0.14, 95% CI [-0.47, 0.75], t(1706) = 0.46, p = 0.644; Std. beta = 0.09, 95% CI [-0.30, 0.48]                                                                                                                                                                                                                                                                              | Interaction (gender and group): F(4, 1705) = 0.22, p =                                                           | Interaction (male, both): beta = 0.51, 95% CI [-8.57, 9.59], t(1705) = 0.11, p = 0.912; Std. beta = 0.02, 95% CI [-0.39, 0.44]                                                                                                                                                                                                                                                                                         |

| Outcome             | Interaction with Age                                                                                          |                                                                                                                                                                                                                                                                                                                                                                                                                                          | Interaction with Gender                                                                                          |                                                                                                                                                                                                                                                                                                                                                                                                                      |
|---------------------|---------------------------------------------------------------------------------------------------------------|------------------------------------------------------------------------------------------------------------------------------------------------------------------------------------------------------------------------------------------------------------------------------------------------------------------------------------------------------------------------------------------------------------------------------------------|------------------------------------------------------------------------------------------------------------------|----------------------------------------------------------------------------------------------------------------------------------------------------------------------------------------------------------------------------------------------------------------------------------------------------------------------------------------------------------------------------------------------------------------------|
|                     | ANCOVA                                                                                                        | Linear regression                                                                                                                                                                                                                                                                                                                                                                                                                        | ANCOVA                                                                                                           | Linear regression                                                                                                                                                                                                                                                                                                                                                                                                    |
|                     | Eta2 (partial) = 3.40e-03, 90% CI [0.00, 8.04e-03]                                                            | Interaction (bp med): beta = 0.44, 95% CI [0.08, 0.80], t(1706) = 2.38, p < .05; Std. beta = 0.28, 95% CI [0.05, 0.51]<br><br>Interaction (statin): beta = -9.09e-03, 95% CI [-0.48, 0.46], t(1706) = -0.04, p = 0.970; Std. beta = -5.78e-03, 95% CI [-0.30, 0.29]                                                                                                                                                                      | 0.930; Eta2 (partial) = 5.06e-04, 90% CI [0.00, 4.64e-04]                                                        | Interaction (male, BP med): beta = -2.05, 95% CI [-10.57, 6.47], t(1705) = -0.47, p = 0.637; Std. beta = -0.09, 95% CI [-0.48, 0.29]<br><br>Interaction (male, statin): beta = 3.85, 95% CI [-6.87, 14.56], t(1705) = 0.70, p = 0.481; Std. beta = 0.17, 95% CI [-0.31, 0.66]                                                                                                                                        |
| Misses – Two back   | Interaction (age and group): F(3, 1706) = 0.80, p = 0.496; Eta2 (partial) = 1.40e-03, 90% CI [0.00, 4.20e-03] | Interaction effect (both medications): beta = -0.05, 95% CI [-0.76, 0.65], t(1706) = -0.15, p = 0.879; Std. beta = -0.03, 95% CI [-0.42, 0.36]<br><br>Interaction (bp med): beta = 0.32, 95% CI [-0.10, 0.73], t(1706) = 1.51, p = 0.132; Std. beta = 0.18, 95% CI [-0.05, 0.40]<br><br>Interaction (statin): beta = 0.09, 95% CI [-0.45, 0.63], t(1706) = 0.32, p = 0.751; Std. beta = 0.05, 95% CI [-0.25, 0.35]                       | Interaction (gender and group): F(4, 1705) = 0.81, p = 0.517; Eta2 (partial) = 1.90e-03, 90% CI [0.00, 4.43e-03] | Interaction (male, both): beta = 3.42, 95% CI [-7.04, 13.89], t(1705) = 0.64, p = 0.521; Std. beta = 0.13, 95% CI [-0.28, 0.55]<br><br>Interaction (male, BP med): beta = -4.97, 95% CI [-14.79, 4.85], t(1705) = -0.99, p = 0.321; Std. beta = -0.20, 95% CI [-0.58, 0.19]<br><br>Interaction (male, statin): beta = 8.04, 95% CI [-4.30, 20.39], t(1705) = 1.28, p = 0.202; Std. beta = 0.32, 95% CI [-0.17, 0.80] |
| Misses – Three back | Interaction (age and group): F(3, 1706) = 1.08, p = 0.356; Eta2 (partial) = 1.90e-03, 90% CI [0.00, 5.26e-03] | Interaction effect (both medications): beta = 0.03, 95% CI [-0.70, 0.75], t(1706) = 0.07, p = 0.945; Std. beta = 0.01, 95% CI [-0.38, 0.40]<br><br>Interaction (bp med): beta = 0.29, 95% CI [-0.14, 0.71], t(1706) = 1.33, p = 0.184; Std. beta = 0.16, 95% CI [-0.07, 0.38]<br><br>Interaction (statin): beta = -0.33, 95% CI [-0.88, 0.23], t(1706) = -1.16, p = 0.248; Std. beta = -0.18, 95% CI [-0.47, 0.12]                       | Interaction (gender and group): F(4, 1705) = 2.14, p = 0.073; Eta2 (partial) = 5.00e-03, 90% CI [0.00, 9.95e-03] | Interaction (male, both): beta = 7.70, 95% CI [-3.01, 18.41], t(1705) = 1.41, p = 0.159; Std. beta = 0.30, 95% CI [-0.12, 0.71]<br><br>Interaction (male, BP med): beta = -3.99, 95% CI [-14.04, 6.05], t(1705) = -0.78, p = 0.436; Std. beta = -0.15, 95% CI [-0.54, 0.23]<br><br>Interaction (male, statin): beta = 15.63, 95% CI [3.00, 28.27], t(1705) = 2.43, p < .05; Std. beta = 0.60, 95% CI [0.12, 1.09]    |
| D-prime             | Interaction (age and group): F(3, 1706) = 1.22, p = 0.301; Eta2 (partial) = 2.14e-03, 90% CI [0.00, 5.76e-03] | Interaction effect (both medications): beta = -5.05e-03, 95% CI [-0.03, 0.02], t(1706) = -0.45, p = 0.653; Std. beta = -0.09, 95% CI [-0.48, 0.30]<br><br>Interaction (bp med): beta = -0.01, 95% CI [-0.03, 5.50e-04], t(1706) = -1.88, p = 0.061; Std. beta = -0.22, 95% CI [-0.45, 9.73e-03]<br><br>Interaction (statin): beta = -1.24e-03, 95% CI [-0.02, 0.02], t(1706) = -0.14, p = 0.885; Std. beta = -0.02, 95% CI [-0.32, 0.28] | Interaction (gender and group): F(4, 1705) = 1.05, p = 0.382; Eta2 (partial) = 2.45e-03, 90% CI [0.00, 5.53e-03] | Interaction (male, both): beta = -0.06, 95% CI [-0.39, 0.26], t(1705) = -0.38, p = 0.701; Std. beta = -0.08, 95% CI [-0.49, 0.33]<br><br>Interaction (male, BP med): beta = 0.15, 95% CI [-0.16, 0.45], t(1705) = 0.93, p = 0.353; Std. beta = 0.18, 95% CI [-0.20, 0.57]<br><br>Interaction (male, statin): beta = -0.32, 95% CI [-0.70, 0.07], t(1705) = -1.62, p = 0.106; Std. beta = -0.40, 95% CI [-0.89, 0.09] |
| Beta                | Interaction (age and group): F(3, 1706) = 0.10, p = 0.959; Eta2 (partial) = 1.78e-04, 90% CI [0.00, 0.00]     | Interaction effect (both medications): beta = 5.42e-03, 95% CI [-0.03, 0.04], t(1706) = 0.32, p = 0.749; Std. beta = 0.06, 95% CI [-0.33, 0.45]<br><br>Interaction (bp med): beta = 1.26e-03, 95% CI [-0.02, 0.02], t(1706) = 0.13, p = 0.900; Std. beta = 0.01, 95% CI [-0.21, 0.24]<br><br>Interaction (statin): beta = 5.78e-03, 95% CI [-0.02, 0.03], t(1706) = 0.45, p = 0.656; Std. beta = 0.07, 95% CI [-0.23, 0.37]              | Interaction (gender and group): F(4, 1705) = 0.07, p = 0.992; Eta2 (partial) = 1.59e-04, 90% CI [0.00, 0.00]     | Interaction (male, both): beta = 0.02, 95% CI [-0.47, 0.51], t(1705) = 0.08, p = 0.939; Std. beta = 0.02, 95% CI [-0.40, 0.43]<br><br>Interaction (male, BP med): beta = 0.12, 95% CI [-0.35, 0.58], t(1705) = 0.49, p = 0.624; Std. beta = 0.10, 95% CI [-0.29, 0.48]<br>Interaction (male, statin): beta = 0.03, 95% CI [-0.55, 0.61], t(1705) = 0.09, p = 0.927; Std. beta = 0.02, 95% CI [-0.46, 0.51]           |

# Analysis of anti-hypertensive medication types

## FERT

| Outcome                    | Controlling for anti-hypertensive subtype                                                                                                                                                                                                                                                                                                                            |                                                                                                                                                                                                                                                                                                                                                                | Controlling for calcium channel blocker                                                                                                                                                                                                                              |                                                                                                                                                                                                                                                                                                                                                                | Antihypertensive subtype as predictor                                                                                                                                                |                                                                                                                                                                                                                                                                                                                                                                                                                                                                                                | Calcium channel blocker as predictor                                                                                                                                             |                   |
|----------------------------|----------------------------------------------------------------------------------------------------------------------------------------------------------------------------------------------------------------------------------------------------------------------------------------------------------------------------------------------------------------------|----------------------------------------------------------------------------------------------------------------------------------------------------------------------------------------------------------------------------------------------------------------------------------------------------------------------------------------------------------------|----------------------------------------------------------------------------------------------------------------------------------------------------------------------------------------------------------------------------------------------------------------------|----------------------------------------------------------------------------------------------------------------------------------------------------------------------------------------------------------------------------------------------------------------------------------------------------------------------------------------------------------------|--------------------------------------------------------------------------------------------------------------------------------------------------------------------------------------|------------------------------------------------------------------------------------------------------------------------------------------------------------------------------------------------------------------------------------------------------------------------------------------------------------------------------------------------------------------------------------------------------------------------------------------------------------------------------------------------|----------------------------------------------------------------------------------------------------------------------------------------------------------------------------------|-------------------|
|                            | ANCOVA                                                                                                                                                                                                                                                                                                                                                               | Linear regression                                                                                                                                                                                                                                                                                                                                              | ANCOVA                                                                                                                                                                                                                                                               | Linear regression                                                                                                                                                                                                                                                                                                                                              | ANCOVA                                                                                                                                                                               | Linear regression                                                                                                                                                                                                                                                                                                                                                                                                                                                                              | ANCOVA                                                                                                                                                                           | Linear regression |
| <b>All emotions - UBHR</b> | Group: F(3) = 2.37, p = 0.068; Eta2 (partial) = 3.84e-03, 90% CI [0.00, 8.62e-03]<br><br>Interaction: F(18) = 5.41, p < .001; Eta2 (partial) = 2.64e-03, 90% CI [1.41e-03, 3.09e-03]                                                                                                                                                                                 | N/A                                                                                                                                                                                                                                                                                                                                                            | Group: F(3) = 3.29, p = 0.020; Eta2 (partial) = 5.32e-03, 90% CI [4.54e-04, 0.01]<br><br>Interaction: F(18) = 5.41, p < .001; Eta2 (partial) = 2.64e-03, 90% CI [1.41e-03, 3.09e-03]                                                                                 | N/A                                                                                                                                                                                                                                                                                                                                                            | Group: F(6) = 0.79, p = 0.581; Eta2 (partial) = 3.72e-03, 90% CI [0.00, 6.07e-03]<br><br>Interaction: F(36) = 2.46, p < .001; Eta2 (partial) = 3.46e-03, 90% CI [1.12e-03, 3.28e-03] | N/A                                                                                                                                                                                                                                                                                                                                                                                                                                                                                            | Group: F(1) = 0.26, p = 0.610; Eta2 (partial) = 2.06e-04, 90% CI [0.00, 3.53e-03]<br><br>Interaction: F(6) = 1.75, p = 0.106; Eta2 (partial) = 4.10e-04, 90% CI [0.00, 6.89e-04] | N/A               |
| <b>Angry - UBHR</b>        | Overall - F(3) = 3.26, p = 0.021; Eta2 (partial) = 5.21e-03, 90% CI [4.29e-04, 0.01]<br><br>Statins - F(1) = 9.00, p = 0.003; Eta2 (partial) = 5.45e-03, 90% CI [1.11e-03, 0.01]<br><br>BP med - F(1) = 0.68, p = 0.411; Eta2 (partial) = 3.93e-04, 90% CI [0.00, 3.51e-03]<br><br>Both - F(1) = 0.01, p = 0.919; Eta2 (partial) = 6.33e-06, 90% CI [0.00, 5.92e-04] | Statin - beta = -0.05, 95% CI [-0.08, -0.02], t(5499) = -3.00, p < .01; Std. beta = -0.29, 95% CI [-0.48, -0.10]<br><br>BP - beta = -1.90e-03, 95% CI [-0.07, 0.07], t(5499) = -0.05, p = 0.957; Std. beta = -0.01, 95% CI [-0.45, 0.42]<br><br>Both - beta = -0.02, 95% CI [-0.09, 0.05], t(5499) = -0.52, p = 0.604; Std. beta = -0.12, 95% CI [-0.58, 0.34] | Overall - F(3) = 4.21, p = 0.006; Eta2 (partial) = 6.73e-03, 90% CI [1.16e-03, 0.01]<br><br>BP - F(1) = 0.38, p = 0.537; Eta2 (partial) = 2.26e-04, 90% CI [0.00, 2.97e-03]<br><br>Both - F(1) = 6.42, p = 0.011; Eta2 (partial) = 3.83e-03, 90% CI [4.67e-04, 0.01] | Statin - beta = -0.05, 95% CI [-0.08, -0.02], t(5504) = -3.00, p < .01; Std. beta = -0.29, 95% CI [-0.48, -0.10]<br><br>BP - beta = -0.01, 95% CI [-0.04, 0.01], t(5504) = -1.05, p = 0.292; Std. beta = -0.09, 95% CI [-0.26, 0.08]<br><br>Both - beta = -0.03, 95% CI [-0.06, -0.38e-03], t(5504) = -2.21, p < .05; Std. beta = -0.21, 95% CI [-0.40, -0.02] | F(6) = 1.04, p = 0.400; Eta2 (partial) = 4.85e-03, 90% CI [0.00, 8.19e-03]                                                                                                           | Ace inhibitor: beta = -0.04, 95% CI [-0.08, -5.09e-03], t(3813) = -2.24, p < .05; Std. beta = -0.25, 95% CI [-0.47, -0.03]<br><br>Angiotensin: beta = -7.68e-03, 95% CI [-0.07, 0.05], t(3813) = -0.24, p = 0.809; Std. beta = -0.05, 95% CI [-0.44, 0.35]<br><br>Beta blocker: beta = 0.01, 95% CI [-0.04, 0.06], t(3813) = 0.41, p = 0.685; Std. beta = 0.06, 95% CI [-0.25, 0.37]<br><br>Calcium channel blocker: beta = -0.02, 95% CI [-0.07, 0.03], t(3813) = -0.78, p = 0.437; Std. beta | N/A                                                                                                                                                                              | N/A               |

| Outcome               | Controlling for anti-hypertensive subtype                                  |                   | Controlling for calcium channel blocker                                    |                   | Antihypertensive subtype as predictor                                      |                                                                                                                                                                                                                                                                                                                                                                                                                                                       | Calcium channel blocker as predictor |                   |
|-----------------------|----------------------------------------------------------------------------|-------------------|----------------------------------------------------------------------------|-------------------|----------------------------------------------------------------------------|-------------------------------------------------------------------------------------------------------------------------------------------------------------------------------------------------------------------------------------------------------------------------------------------------------------------------------------------------------------------------------------------------------------------------------------------------------|--------------------------------------|-------------------|
|                       | ANCOVA                                                                     | Linear regression | ANCOVA                                                                     | Linear regression | ANCOVA                                                                     | Linear regression                                                                                                                                                                                                                                                                                                                                                                                                                                     | ANCOVA                               | Linear regression |
|                       |                                                                            |                   |                                                                            |                   |                                                                            | = -0.12, 95% CI [-0.42, 0.18]<br><br>Combination: beta = -7.39e-03, 95% CI [-0.04, 0.02], t(3813) = -0.47, p = 0.640; Std. beta = -0.05, 95% CI [-0.24, 0.15]<br><br>Diuretic: beta = 0.03, 95% CI [-0.07, 0.13], t(3813) = 0.58, p = 0.564; Std. beta = 0.19, 95% CI [-0.46, 0.85]                                                                                                                                                                   |                                      |                   |
| <b>Disgust - UBHR</b> | F(3) = 0.37, p = 0.773; Eta2 (partial) = 6.03e-04, 90% CI [0.00, 1.35e-03] | N/A               | F(3) = 0.27, p = 0.850; Eta2 (partial) = 4.33e-04, 90% CI [0.00, 1.40e-03] | N/A               | F(6) = 0.62, p = 0.712; Eta2 (partial) = 2.95e-03, 90% CI [0.00, 6.60e-03] | Ace inhibitor: beta = 7.08e-03, 95% CI [-0.02, 0.03], t(3813) = 0.51, p = 0.610; Std. beta = 0.05, 95% CI [-0.15, 0.25]<br>Angiotensin: beta = 0.02, 95% CI [-0.02, 0.07], t(3813) = 0.97, p = 0.333; Std. beta = 0.18, 95% CI [-0.18, 0.54]<br>Beta blocker: beta = 0.02, 95% CI [-0.02, 0.06], t(3813) = 0.90, p = 0.371; Std. beta = 0.13, 95% CI [-0.15, 0.41]<br>Calcium channel blocker: beta = 0.02, 95% CI [-0.02, 0.06], t(3813) = 1.13, p = | N/A                                  | N/A               |

| Outcome     | Controlling for anti-hypertensive subtype                                                                                                                                                                                                                                                                                                                      |                                                                                                                                                                                                                                                                                                                                                      | Controlling for calcium channel blocker                                                                                                                                                                                                                            |                                                                                                                                                                                                                                                                                                                                                                      | Antihypertensive subtype as predictor                                  |                                                                                                                                                                                                                                                                                                                                                                                                                                                                                   | Calcium channel blocker as predictor |                   |
|-------------|----------------------------------------------------------------------------------------------------------------------------------------------------------------------------------------------------------------------------------------------------------------------------------------------------------------------------------------------------------------|------------------------------------------------------------------------------------------------------------------------------------------------------------------------------------------------------------------------------------------------------------------------------------------------------------------------------------------------------|--------------------------------------------------------------------------------------------------------------------------------------------------------------------------------------------------------------------------------------------------------------------|----------------------------------------------------------------------------------------------------------------------------------------------------------------------------------------------------------------------------------------------------------------------------------------------------------------------------------------------------------------------|------------------------------------------------------------------------|-----------------------------------------------------------------------------------------------------------------------------------------------------------------------------------------------------------------------------------------------------------------------------------------------------------------------------------------------------------------------------------------------------------------------------------------------------------------------------------|--------------------------------------|-------------------|
|             | ANCOVA                                                                                                                                                                                                                                                                                                                                                         | Linear regression                                                                                                                                                                                                                                                                                                                                    | ANCOVA                                                                                                                                                                                                                                                             | Linear regression                                                                                                                                                                                                                                                                                                                                                    | ANCOVA                                                                 | Linear regression                                                                                                                                                                                                                                                                                                                                                                                                                                                                 | ANCOVA                               | Linear regression |
|             |                                                                                                                                                                                                                                                                                                                                                                |                                                                                                                                                                                                                                                                                                                                                      |                                                                                                                                                                                                                                                                    |                                                                                                                                                                                                                                                                                                                                                                      |                                                                        | 0.258; Std. beta = 0.16, 95% CI [-0.11, 0.43]<br>Combination: beta = -4.57e-03, 95% CI [-0.03, 0.02], t(3813) = -0.37, p = 0.710; Std. beta = -0.03, 95% CI [-0.21, 0.14]<br>Diuretic: beta = 0.03, 95% CI [-0.05, 0.11], t(3813) = 0.70, p = 0.483; Std. beta = 0.21, 95% CI [-0.38, 0.81]                                                                                                                                                                                       |                                      |                   |
| Fear - UBHR | Overall: F(3) = 2.57, p = 0.053; Eta2 (partial) = 4.10e-03, 90% CI [0.00, 9.00e-03]<br><br>Statin - F(1) = 6.80, p = 0.009; Eta2 (partial) = 4.11e-03, 90% CI [5.58e-04, 0.01]<br><br>BP - F(1) = 0.75, p = 0.388; Eta2 (partial) = 4.34e-04, 90% CI [0.00, 3.64e-03]<br><br>Both - F(1) = 0.10, p = 0.757; Eta2 (partial) = 5.80e-05, 90% CI [0.00, 1.97e-03] | Statin - beta = -0.05, 95% CI [-0.08, -0.02], t(5499) = -3.00, p < .01; Std. beta = -0.29, 95% CI [-0.48, -0.10]<br><br>BP - beta = 0.03, 95% CI [-0.04, 0.09], t(5495) = 0.79, p = 0.432; Std. beta = 0.18, 95% CI [-0.27, 0.63]<br><br>Both - beta = 0.01, 95% CI [-0.06, 0.08], t(5495) = 0.31, p = 0.754; Std. beta = 0.08, 95% CI [-0.40, 0.55] | Overall: F(3) = 3.93, p = 0.008; Eta2 (partial) = 6.27e-03, 90% CI [9.32e-04, 0.01]<br><br>BP: F(1) = 0.55, p = 0.459; Eta2 (partial) = 3.23e-04, 90% CI [0.00, 3.32e-03]<br><br>Both - F(1) = 8.84, p = 0.003; Eta2 (partial) = 5.24e-03, 90% CI [1.05e-03, 0.01] | Statin - beta = -0.04, 95% CI [-0.07, -9.57e-03], t(5500) = -2.62, p < .01; Std. beta = -0.26, 95% CI [-0.46, -0.07]<br><br>BP: beta = -0.02, 95% CI [-0.04, 6.60e-03], t(5500) = -1.45, p = 0.147; Std. beta = -0.13, 95% CI [-0.31, 0.05]<br><br>Both: beta = -0.03, 95% CI [-0.06, -6.33e-03], t(5500) = -2.40, p < .05; Std. beta = -0.24, 95% CI [-0.43, -0.04] | F(6) = 1.24, p = 0.284; Eta2 (partial) = 5.76e-03, 90% CI [0.00, 0.01] | Ace inhibitor: beta = -0.02, 95% CI [-0.05, 0.01], t(3813) = -1.34, p = 0.180; Std. beta = -0.15, 95% CI [-0.38, 0.07]<br>Angiotensin: beta = -0.02, 95% CI [-0.07, 0.04], t(3813) = -0.52, p = 0.600; Std. beta = -0.11, 95% CI [-0.51, 0.29]<br>Beta blocker: beta = -0.04, 95% CI [-0.09, 3.66e-03], t(3813) = -1.80, p = 0.072; Std. beta = -0.29, 95% CI [-0.61, 0.03]<br>Calcium channel blocker: beta = -0.02, 95% CI [-0.06, 0.03], t(3813) = -0.68, p = 0.494; Std. beta | N/A                                  | N/A               |



| Outcome                 | Controlling for anti-hypertensive subtype                                  |                   | Controlling for calcium channel blocker                                    |                   | Antihypertensive subtype as predictor                                  |                                                                                                                                                                                                                                                                                                                                                                                                                                                                         | Calcium channel blocker as predictor |                   |
|-------------------------|----------------------------------------------------------------------------|-------------------|----------------------------------------------------------------------------|-------------------|------------------------------------------------------------------------|-------------------------------------------------------------------------------------------------------------------------------------------------------------------------------------------------------------------------------------------------------------------------------------------------------------------------------------------------------------------------------------------------------------------------------------------------------------------------|--------------------------------------|-------------------|
|                         | ANCOVA                                                                     | Linear regression | ANCOVA                                                                     | Linear regression | ANCOVA                                                                 | Linear regression                                                                                                                                                                                                                                                                                                                                                                                                                                                       | ANCOVA                               | Linear regression |
|                         |                                                                            |                   |                                                                            |                   |                                                                        | = -0.11, 95% CI [-0.41, 0.20]<br>Combination: beta = -9.93e-03, 95% CI [-0.04, 0.02], t(3813) = -0.68, p = 0.497; Std. beta = -0.07, 95% CI [-0.27, 0.13]<br><br>Diuretic: beta = -0.08, 95% CI [-0.17, 0.02], t(3813) = -1.58, p = 0.115; Std. beta = -0.54, 95% CI [-1.20, 0.13]                                                                                                                                                                                      |                                      |                   |
| <b>Happiness - UBHR</b> | F(3) = 1.28, p = 0.279; Eta2 (partial) = 2.08e-03, 90% CI [0.00, 5.52e-03] | N/A               | F(3) = 1.26, p = 0.285; Eta2 (partial) = 2.06e-03, 90% CI [0.00, 5.48e-03] | N/A               | F(6) = 1.38, p = 0.221; Eta2 (partial) = 6.49e-03, 90% CI [0.00, 0.01] | Ace inhibitor: beta = -7.78e-03, 95% CI [-0.03, 0.01], t(3813) = -0.69, p = 0.487; Std. beta = -0.07, 95% CI [-0.27, 0.13]<br><br>Angiotensin: beta = -0.02, 95% CI [-0.06, 0.02], t(3813) = -1.11, p = 0.267; Std. beta = -0.20, 95% CI [-0.56, 0.15]<br>Beta blocker: beta = 4.75e-03, 95% CI [-0.03, 0.04], t(3813) = 0.30, p = 0.762; Std. beta = 0.04, 95% CI [-0.24, 0.32]<br>Calcium channel blocker: beta = -3.83e-03, 95% CI [-0.03, 0.03], t(3813) = -0.25, p | N/A                                  | N/A               |

| Outcome               | Controlling for anti-hypertensive subtype                                  |                   | Controlling for calcium channel blocker                                    |                   | Antihypertensive subtype as predictor                                  |                                                                                                                                                                                                                                                                                                                                                                                                                                                                                           | Calcium channel blocker as predictor |                   |
|-----------------------|----------------------------------------------------------------------------|-------------------|----------------------------------------------------------------------------|-------------------|------------------------------------------------------------------------|-------------------------------------------------------------------------------------------------------------------------------------------------------------------------------------------------------------------------------------------------------------------------------------------------------------------------------------------------------------------------------------------------------------------------------------------------------------------------------------------|--------------------------------------|-------------------|
|                       | ANCOVA                                                                     | Linear regression | ANCOVA                                                                     | Linear regression | ANCOVA                                                                 | Linear regression                                                                                                                                                                                                                                                                                                                                                                                                                                                                         | ANCOVA                               | Linear regression |
|                       |                                                                            |                   |                                                                            |                   |                                                                        | = 0.799; Std. beta = -0.03, 95% CI [-0.30, 0.23]<br>Combination: beta = -0.02, 95% CI [-0.04, -5.51e-03], t(3813) = -2.52, p < .05; Std. beta = -0.23, 95% CI [-0.40, -0.05]<br>Diuretic: beta = 0.02, 95% CI [-0.04, 0.09], t(3813) = 0.64, p = 0.521; Std. beta = 0.19, 95% CI [-0.40, 0.79]                                                                                                                                                                                            |                                      |                   |
| <b>Sadness - UBHR</b> | F(3) = 1.72, p = 0.160; Eta2 (partial) = 2.77e-03, 90% CI [0.00, 6.76e-03] | N/A               | F(3) = 1.71, p = 0.164; Eta2 (partial) = 2.75e-03, 90% CI [0.00, 6.74e-03] | N/A               | F(6) = 1.50, p = 0.175; Eta2 (partial) = 7.06e-03, 90% CI [0.00, 0.01] | Ace inhibitor: beta = -0.03, 95% CI [-0.05, 2.26e-04], t(3813) = -1.94, p = 0.052; Std. beta = -0.19, 95% CI [-0.38, 1.55e-03]<br>Angiotensin: beta = -0.01, 95% CI [-0.06, 0.04], t(3813) = -0.50, p = 0.620; Std. beta = -0.09, 95% CI [-0.42, 0.25]<br>Beta blocker: beta = -4.28e-03, 95% CI [-0.04, 0.03], t(3813) = -0.22, p = 0.828; Std. beta = -0.03, 95% CI [-0.30, 0.24]<br>Calcium channel blocker: beta = -0.02, 95% CI [-0.05, 0.02], t(3813) = -0.89, p = 0.372; Std. beta | N/A                                  | N/A               |

| Outcome                | Controlling for anti-hypertensive subtype                                  |                   | Controlling for calcium channel blocker                                    |                   | Antihypertensive subtype as predictor                                      |                                                                                                                                                                                                                                                                                                                                                                                                                                                                                                         | Calcium channel blocker as predictor |                   |
|------------------------|----------------------------------------------------------------------------|-------------------|----------------------------------------------------------------------------|-------------------|----------------------------------------------------------------------------|---------------------------------------------------------------------------------------------------------------------------------------------------------------------------------------------------------------------------------------------------------------------------------------------------------------------------------------------------------------------------------------------------------------------------------------------------------------------------------------------------------|--------------------------------------|-------------------|
|                        | ANCOVA                                                                     | Linear regression | ANCOVA                                                                     | Linear regression | ANCOVA                                                                     | Linear regression                                                                                                                                                                                                                                                                                                                                                                                                                                                                                       | ANCOVA                               | Linear regression |
|                        |                                                                            |                   |                                                                            |                   |                                                                            | = -0.12, 95% CI [-0.37, 0.14]<br>Combination: beta = 6.44e-03, 95% CI [-0.02, 0.03],<br>t(3813) = 0.52, p = 0.605; Std. beta = 0.04, 95% CI [-0.12, 0.21]<br>Diuretic: beta = 0.08, 95% CI [-3.81e-03, 0.16],<br>t(3813) = 1.87, p = 0.062; Std. beta = 0.53, 95% CI [-0.03, 1.09]                                                                                                                                                                                                                      |                                      |                   |
| <b>Surprise - UBHR</b> | F(3) = 0.95, p = 0.414; Eta2 (partial) = 1.55e-03, 90% CI [0.00, 4.44e-03] | N/A               | F(3) = 0.65, p = 0.583; Eta2 (partial) = 1.06e-03, 90% CI [0.00, 3.33e-03] | N/A               | F(6) = 0.32, p = 0.928; Eta2 (partial) = 1.51e-03, 90% CI [0.00, 7.42e-04] | Ace inhibitor: beta = 1.13e-03, 95% CI [-0.02, 0.02],<br>t(3813) = 0.09, p = 0.925; Std. beta = 9.54e-03, 95% CI [-0.19, 0.21]<br>Angiotensin: beta = 0.02, 95% CI [-0.02, 0.06],<br>t(3813) = 0.91, p = 0.364; Std. beta = 0.16, 95% CI [-0.19, 0.52]<br>Beta blocker: beta = 1.84e-05, 95% CI [-0.03, 0.03],<br>t(3813) = 1.10e-03, p > .999; Std. beta = 1.56e-04, 95% CI [-0.28, 0.28]<br>Calcium channel blocker: beta = -6.44e-03, 95% CI [-0.04, 0.02],<br>t(3813) = -0.40, p = 0.687; Std. beta | N/A                                  | N/A               |

| Outcome | Controlling for anti-hypertensive subtype |                   | Controlling for calcium channel blocker |                   | Antihypertensive subtype as predictor |                                                                                                                                                                                                                                                                                 | Calcium channel blocker as predictor |                   |
|---------|-------------------------------------------|-------------------|-----------------------------------------|-------------------|---------------------------------------|---------------------------------------------------------------------------------------------------------------------------------------------------------------------------------------------------------------------------------------------------------------------------------|--------------------------------------|-------------------|
|         | ANCOVA                                    | Linear regression | ANCOVA                                  | Linear regression | ANCOVA                                | Linear regression                                                                                                                                                                                                                                                               | ANCOVA                               | Linear regression |
|         |                                           |                   |                                         |                   |                                       | = -0.05, 95% CI [-0.32, 0.21]<br>Combination: beta = 9.68e-03, 95% CI [-0.01, 0.03], t(3813) = 0.92, p = 0.358; Std. beta = 0.08, 95% CI [-0.09, 0.26]<br>Diuretic: beta = -6.77e-03, 95% CI [-0.08, 0.06], t(3813) = -0.19, p = 0.847; Std. beta = -0.06, 95% CI [-0.64, 0.53] |                                      |                   |

## PILT

| Outcome                                              | Controlling for anti-hypertensive subtype                                        |                                                                                                                                                                                                                                                                                                                                                  | Controlling for calcium channel blocker                                          |                                                                                                                                                                                                                                                                                                                                                | Antihypertensive subtype as predictor                                        |                                                                                                                                                                                                                                                                                                                                                                                                                                                                                                                                                                                                                            | Calcium channel blocker as predictor                                             |                                                                                                         |
|------------------------------------------------------|----------------------------------------------------------------------------------|--------------------------------------------------------------------------------------------------------------------------------------------------------------------------------------------------------------------------------------------------------------------------------------------------------------------------------------------------|----------------------------------------------------------------------------------|------------------------------------------------------------------------------------------------------------------------------------------------------------------------------------------------------------------------------------------------------------------------------------------------------------------------------------------------|------------------------------------------------------------------------------|----------------------------------------------------------------------------------------------------------------------------------------------------------------------------------------------------------------------------------------------------------------------------------------------------------------------------------------------------------------------------------------------------------------------------------------------------------------------------------------------------------------------------------------------------------------------------------------------------------------------------|----------------------------------------------------------------------------------|---------------------------------------------------------------------------------------------------------|
|                                                      | ANCOVA                                                                           | Linear regression                                                                                                                                                                                                                                                                                                                                | ANCOVA                                                                           | Linear regression                                                                                                                                                                                                                                                                                                                              | ANCOVA                                                                       | Linear regression                                                                                                                                                                                                                                                                                                                                                                                                                                                                                                                                                                                                          | ANCOVA                                                                           | Linear regression                                                                                       |
| <b>Gain trials - choice of advantageous stimulus</b> | F(3, 1100) = 0.25, p = 0.861; Eta2 (partial) = 6.81e-04, 90% CI [0.00, 1.53e-03] | Both: beta = 3.52, 95% CI [-7.68, 14.73], t(1100) = 0.62, p = 0.537; Std. beta = 0.19, 95% CI [-0.41, 0.79]<br><br>BP: beta = 1.72, 95% CI [-8.74, 12.18], t(1100) = 0.32, p = 0.747; Std. beta = 0.09, 95% CI [-0.47, 0.66]<br><br>Statin: beta = 0.59, 95% CI [-5.49, 6.66], t(1100) = 0.19, p = 0.850; Std. beta = 0.03, 95% CI [-0.30, 0.36] | F(3, 1105) = 0.25, p = 0.861; Eta2 (partial) = 6.79e-04, 90% CI [0.00, 1.52e-03] | Both: beta = 4.18, 95% CI [-0.78, 9.14], t(1105) = 1.66, p = 0.098; Std. beta = 0.23, 95% CI [-0.04, 0.49]<br><br>BP: beta = 2.56, 95% CI [-1.79, 6.90], t(1105) = 1.15, p = 0.249; Std. beta = 0.14, 95% CI [-0.10, 0.37]<br><br>Statin: beta = 0.41, 95% CI [-5.64, 6.47], t(1105) = 0.13, p = 0.894; Std. beta = 0.02, 95% CI [-0.30, 0.35] | F(6, 1103) = 1.16, p = 0.326; Eta2 (partial) = 6.26e-03, 90% CI [0.00, 0.01] | Ace inhibitor: beta = 1.92, 95% CI [-3.54, 7.37], t(1103) = 0.69, p = 0.491; Std. beta = 0.10, 95% CI [-0.19, 0.40]<br>Angiotensin: beta = 8.53, 95% CI [-2.10, 19.17], t(1103) = 1.57, p = 0.116; Std. beta = 0.46, 95% CI [-0.11, 1.03]<br>Beta blocker: beta = 5.25, 95% CI [-2.22, 12.73], t(1103) = 1.38, p = 0.168; Std. beta = 0.28, 95% CI [-0.12, 0.69]<br>Calcium channel blocker: beta = -4.22, 95% CI [-11.26, 2.81], t(1103) = -1.18, p = 0.239; Std. beta = -0.23, 95% CI [-0.61, 0.15]<br>Combination: beta = 0.74, 95% CI [-4.04, 5.52], t(1103) = 0.30, p = 0.762; Std. beta = 0.04, 95% CI [-0.22, 0.30] | F(1, 1108) = 1.84, p = 0.175; Eta2 (partial) = 1.66e-03, 90% CI [0.00, 8.08e-03] | beta = -2.40, 95% CI [-7.00, 2.20], t(1108) = -1.02, p = 0.307; Std. beta = -0.13, 95% CI [-0.38, 0.12] |

| Outcome                                              | Controlling for anti-hypertensive subtype                                    |                                                                                                                                                                                                                                                                                                                                                    | Controlling for calcium channel blocker                                      |                                                                                                                                                                                                                                                                                                                                                         | Antihypertensive subtype as predictor                                        |                                                                                                                                                                                                                                                                                                                                                                                                                                                                                                                                                                                                                                                                                                                                                   | Calcium channel blocker as predictor                                             |                                                                                                      |
|------------------------------------------------------|------------------------------------------------------------------------------|----------------------------------------------------------------------------------------------------------------------------------------------------------------------------------------------------------------------------------------------------------------------------------------------------------------------------------------------------|------------------------------------------------------------------------------|---------------------------------------------------------------------------------------------------------------------------------------------------------------------------------------------------------------------------------------------------------------------------------------------------------------------------------------------------------|------------------------------------------------------------------------------|---------------------------------------------------------------------------------------------------------------------------------------------------------------------------------------------------------------------------------------------------------------------------------------------------------------------------------------------------------------------------------------------------------------------------------------------------------------------------------------------------------------------------------------------------------------------------------------------------------------------------------------------------------------------------------------------------------------------------------------------------|----------------------------------------------------------------------------------|------------------------------------------------------------------------------------------------------|
|                                                      | ANCOVA                                                                       | Linear regression                                                                                                                                                                                                                                                                                                                                  | ANCOVA                                                                       | Linear regression                                                                                                                                                                                                                                                                                                                                       | ANCOVA                                                                       | Linear regression                                                                                                                                                                                                                                                                                                                                                                                                                                                                                                                                                                                                                                                                                                                                 | ANCOVA                                                                           | Linear regression                                                                                    |
|                                                      |                                                                              |                                                                                                                                                                                                                                                                                                                                                    |                                                                              |                                                                                                                                                                                                                                                                                                                                                         |                                                                              | Diuretic: beta = -5.89, 95% CI [-20.85, 9.07], t(1103) = -0.77, p = 0.440; Std. beta = -0.32, 95% CI [-1.12, 0.49]                                                                                                                                                                                                                                                                                                                                                                                                                                                                                                                                                                                                                                |                                                                                  |                                                                                                      |
| <b>Loss trials - choice of advantageous stimulus</b> | F(3, 1100) = 2.38, p = 0.068; Eta2 (partial) = 6.45e-03, 90% CI [0.00, 0.01] | Both: beta = 2.36, 95% CI [-6.30, 11.03], t(1100) = 0.54, p = 0.592; Std. beta = 0.16, 95% CI [-0.43, 0.76]<br><br>BP: beta = 0.40, 95% CI [-7.69, 8.49], t(1100) = 0.10, p = 0.923; Std. beta = 0.03, 95% CI [-0.53, 0.59]<br><br>Statin: beta = -1.80, 95% CI [-6.50, 2.90], t(1100) = -0.75, p = 0.452; Std. beta = -0.12, 95% CI [-0.45, 0.20] | F(3, 1105) = 2.39, p = 0.068; Eta2 (partial) = 6.44e-03, 90% CI [0.00, 0.01] | Both: beta = -0.67, 95% CI [-4.51, 3.16], t(1105) = -0.35, p = 0.730; Std. beta = -0.05, 95% CI [-0.31, 0.22]<br><br>BP: beta = -2.40, 95% CI [-5.76, 0.96], t(1105) = -1.40, p = 0.161; Std. beta = -0.17, 95% CI [-0.40, 0.07]<br><br>Statin: beta = -2.04, 95% CI [-6.72, 2.64], t(1105) = -0.85, p = 0.393; Std. beta = -0.14, 95% CI [-0.46, 0.18] | F(6, 1103) = 1.17, p = 0.319; Eta2 (partial) = 6.34e-03, 90% CI [0.00, 0.01] | Ace inhibitor: beta = 0.37, 95% CI [-3.85, 4.60], t(1103) = 0.17, p = 0.862; Std. beta = 0.03, 95% CI [-0.27, 0.32]<br>Angiotensin: beta = 1.25, 95% CI [-6.97, 9.48], t(1103) = 0.30, p = 0.765; Std. beta = 0.09, 95% CI [-0.48, 0.65]<br>Beta blocker: beta = -4.48, 95% CI [-10.26, 1.30], t(1103) = -1.52, p = 0.129; Std. beta = -0.31, 95% CI [-0.71, 0.09]<br>Calcium channel blocker: beta = -0.37, 95% CI [-5.82, 5.07], t(1103) = -0.13, p = 0.893; Std. beta = -0.03, 95% CI [-0.40, 0.35]<br>Combination: beta = 0.47, 95% CI [-3.23, 4.16], t(1103) = 0.25, p = 0.804; Std. beta = 0.03, 95% CI [-0.22, 0.29]<br>Diuretic: beta = -7.05, 95% CI [-18.62, 4.52], t(1103) = -1.19, p = 0.232; Std. beta = -0.49, 95% CI [-1.29, 0.31] | F(1, 1108) = 0.03, p = 0.853; Eta2 (partial) = 3.10e-05, 90% CI [0.00, 1.97e-03] | beta = 2.07, 95% CI [-1.48, 5.62], t(1108) = 1.14, p = 0.253; Std. beta = 0.14, 95% CI [-0.10, 0.39] |

## N-back

| Outcome                                         | Controlling for anti-hypertensive subtype                                  |                   | Controlling for calcium channel blocker                                    |                   | Antihypertensive subtype as predictor                                       | Calcium channel blocker as predictor |                                                                                |                   |
|-------------------------------------------------|----------------------------------------------------------------------------|-------------------|----------------------------------------------------------------------------|-------------------|-----------------------------------------------------------------------------|--------------------------------------|--------------------------------------------------------------------------------|-------------------|
|                                                 | ANCOVA                                                                     | Linear regression | ANCOVA                                                                     | Linear regression | ANCOVA                                                                      | Linear regression                    | ANCOVA                                                                         | Linear regression |
| <b>Hits– All test conditions</b>                | F(6) = 4.22, p < .001; Eta2 (partial) = 0.01, 90% CI [3.04e-03, 0.02]      | N/A               | F(6) = 4.22, p < .001; Eta2 (partial) = 0.01, 90% CI [3.04e-03, 0.02]      | N/A               | F(12) = 0.74, p = 0.714; Eta2 (partial) = 3.67e-03, 90% CI [0.00, 2.99e-03] | N/A                                  | F(2) = 0.47, p = 0.623; Eta2 (partial) = 3.92e-04, 90% CI [0.00, 2.10e-03]     | N/A               |
| <b>False alarms – All test conditions</b>       | F(6) = 1.75, p = 0.106; Eta2 (partial) = 4.33e-03, 90% CI [0.00, 7.26e-03] | N/A               | F(6) = 1.75, p = 0.106; Eta2 (partial) = 4.33e-03, 90% CI [0.00, 7.26e-03] | N/A               | F(12) = 1.49, p = 0.121; Eta2 (partial) = 7.37e-03, 90% CI [0.00, 8.80e-03] | N/A                                  | F(2) = 3.02, p = 0.049; Eta2 (partial) = 2.50e-03, 90% CI [6.18e-06, 6.40e-03] | N/A               |
| <b>Correct rejections – All test conditions</b> | F(6) = 0.74, p = 0.620; Eta2 (partial) = 1.83e-03, 90% CI [0.00, 2.94e-03] | N/A               | F(6) = 0.74, p = 0.620; Eta2 (partial) = 1.83e-03, 90% CI [0.00, 2.94e-03] | N/A               | F(12) = 0.60, p = 0.843; Eta2 (partial) = 2.99e-03, 90% CI [0.00, 1.73e-03] | N/A                                  | F(2) = 0.54, p = 0.581; Eta2 (partial) = 4.49e-04, 90% CI [0.00, 2.27e-03]     | N/A               |

| Outcome                             | Controlling for anti-hypertensive subtype                             |                   | Controlling for calcium channel blocker                               |                   | Antihypertensive subtype as predictor                                       |                   | Calcium channel blocker as predictor                                       |                   |
|-------------------------------------|-----------------------------------------------------------------------|-------------------|-----------------------------------------------------------------------|-------------------|-----------------------------------------------------------------------------|-------------------|----------------------------------------------------------------------------|-------------------|
|                                     | ANCOVA                                                                | Linear regression | ANCOVA                                                                | Linear regression | ANCOVA                                                                      | Linear regression | ANCOVA                                                                     | Linear regression |
| <b>Misses – All test conditions</b> | F(6) = 4.81, p < .001; Eta2 (partial) = 0.01, 90% CI [4.01e-03, 0.02] | N/A               | F(6) = 4.81, p < .001; Eta2 (partial) = 0.01, 90% CI [4.01e-03, 0.02] | N/A               | F(12) = 0.98, p = 0.462; Eta2 (partial) = 4.88e-03, 90% CI [0.00, 5.03e-03] | N/A               | F(2) = 0.92, p = 0.398; Eta2 (partial) = 7.63e-04, 90% CI [0.00, 3.09e-03] | N/A               |
